# Supplementary material
Source: publisher figshare collection journal article supplement (https://rs.figshare.com/ndownloader/files/17458424)
Supplement: Supplementary file 1 [file 17458424]

## Sheet: Raw_data
id	nest	locs.in	pts off nest ( in %)	prop.obs (in 50%UD)	area50 new	nest.area new	UD50byarea	test.ratio	Significance	FG	SG	DB	Sub	FL	MA	Q status	PQ status	ed_centre	avg_ed	wasps_tot
_B	v57	74	0	0.675676	4.16	21.52	19.33	3.49497	1	0.78	0.21	0.16	0.24	0.32	0	0	0	0.177435	1.99	21
_D	v57	74	47.14	0.648649	6.11	21.52	28.4	2.28381	1	0.56	0.32	0.24	1.83	1.27	0.4	0	0	1.20063	2.6	21
_G	v57	182	7.61	0.571429	6.36	21.52	29.57	1.93223	1	0.35	0.48	3.34	2.7	2.38	0.16	0	0	0.684421	2.68	21
_O	v57	40	6.98	0.7	8.11	21.52	37.68	1.85794	0	0.87	0.11	0.08	0.08	0.08	0.32	0	0	0.544998	2.63	21
_W	v57	39	33.9	0.641026	5.41	21.52	25.12	2.55149	1	0.8	0.14	0.32	0.48	1.19	0	0	0	1.15427	2.89	21
_X	v57	228	1.72	0.526316	5.97	21.52	27.75	1.89689	1	0.22	0.57	2.62	1.11	1.51	0.16	0	0	0.30052	2.38	21
_Y	v57	114	39.04	0.596491	8.34	21.52	38.76	1.53878	0	0.35	0.51	0.32	2.54	2.07	0.24	0	0	0.862662	2.55	21
BB	v57	290	0.34	0.589655	8.17	21.52	37.98	1.55251	0	0.12	0.77	0.16	0.32	0.95	0	0	0	0.387773	2.47	21
G-	v57	69	56.33	0.565217	6.89	21.52	32	1.76624	0	0.49	0.39	0.48	1.03	1.83	0.16	0	0	0.667504	2.66	21
GG	v57	51	44.57	0.705882	11.32	21.52	52.59	1.34234	0	0.71	0.23	0.32	0.4	0.72	0	0	0	0.69756	2.83	21
L-	v57	76	40.16	0.671053	7.75	21.52	36	1.86422	1	0.44	0.5	0.24	0.59	0.36	0.12	0	0	0.712726	1.61	21
O-	v57	176	24.14	0.636364	8.24	21.52	38.28	1.66229	0	0.31	0.59	0.64	1.59	1.27	0	0	0	0.557084	2.65	21
OO	v57	93	44.64	0.537634	5.43	21.52	25.25	2.12929	1	0.51	0.43	0.08	0.4	0.32	0.16	0	0	0.857064	2.62	21
PQ	v57	152	33.33	0.572368	7.24	21.52	33.64	1.70164	0	0.31	0.53	5.33	0.56	2.23	0.32	2	1	1.28386	2.67	21
Q	v57	315	0.94	0.565079	5.92	21.52	27.5	2.0549	1	0.03	0.66	1.51	2.86	0	0.64	1	0	0.915666	0	21
R-	v57	66	19.51	0.636364	11.05	21.52	51.34	1.2396	0	0.5	0.38	0.71	0.94	3.06	0	0	0	0.483163	2.51	21
W-	v57	118	53.36	0.677966	8.59	21.52	39.93	1.69808	0	0.19	0.63	4.69	0.87	1.27	0.32	0	0	0.912816	2.56	21
WW	v57	219	5.19	0.60274	8.6	21.52	39.97	1.50791	0	0.26	0.51	1.99	2.86	2.78	0.64	0	0	0.953911	2.65	21
X-	v57	62	18.42	0.580645	6.75	21.52	31.35	1.85214	0	0.79	0.17	0.24	0.24	0.64	0	0	0	0.271865	2.34	21
XX	v57	96	14.29	0.65625	8.28	21.52	38.49	1.70485	0	0.69	0.23	0.08	1.91	1.03	0.16	0	0	0.89162	2.4	21
Y-	v57	93	16.96	0.752688	10.51	21.52	48.83	1.54153	0	0.64	0.31	0.32	0.48	0.48	0.08	0	0	1.04553	2.84	21
_B	v82	171	44.3	0.736842	9.75	25.96	37.54	1.96272	1	0.07	0.86	0.64	0.48	0.08	0.56	0	0	1.16162	3.23	22
_D	v82	176	42.67	0.693182	9.49	25.96	36.55	1.89657	1	0.35	0.43	3.68	2	0.56	0.16	0	0	0.757716	3.39	22
_L	v82	282	8.14	0.567376	5.4	25.96	20.79	2.72887	1	0.37	0.47	0.72	0.24	0.08	0.32	0	0	0.140508	2.63	22
_S	v82	57	72.06	0.614035	3.78	25.96	14.56	4.21863	1	0.52	0.45	0.08	0.16	0.32	0.32	0	0	1.27131	2.77	22
_X	v82	117	61.89	0.709402	11.71	25.96	45.11	1.57252	0	0.61	0.27	1.52	0.72	0.16	0.4	0	0	0.259691	3.01	22
B-	v82	68	77.85	0.617647	7.57	25.96	29.16	2.11793	1	0.79	0.15	0.24	0.64	0.08	0.08	0	0	1.69411	2.71	22
BB	v82	176	42.67	0.727273	11.43	25.96	44.04	1.65135	0	0.41	0.47	0.8	0.32	0.72	0.16	0	0	0.562408	2.98	22
D-	v82	73	76.22	0.753425	13.97	25.96	53.79	1.40056	0	0.61	0.17	0.48	2.08	1.04	0.64	0	0	0.528579	2.86	22
G-	v82	238	22.48	0.571429	2.35	25.96	9.04	6.31958	1	0.27	0.67	0.08	0	0	0	0	0	0.954395	2.26	22
GG	v82	265	13.68	0.539623	2.55	25.96	9.84	5.4856	1	0.17	0.77	0	0.16	0	0	0	0	1.23603	2.45	22
L-	v82	209	31.92	0.574163	4.75	25.96	18.3	3.13776	1	0.35	0.57	0.24	0.16	0.16	1.28	0	0	0.683137	2.49	22
LL	v82	304	0.98	0.628289	3.04	25.96	11.71	5.36685	1	0.02	0.93	0.16	0	0.08	0	0	0	0.518187	2.37	22
OO	v82	157	48.86	0.617834	9.99	25.96	38.49	1.60524	0	0.55	0.3	2.16	0.16	0.64	0.48	0	0	0.535561	2.84	22
PQ	v82	143	53.42	0.734266	12.22	25.96	47.06	1.56025	0	0.4	0.3	10	1.44	0.72	0.32	2	1	0.373535	3.16	22
Q	v82	300	2.28	0.583333	11.25	25.96	43.34	1.34595	0	0.01	0.63	1.92	7.6	0	1.2	1	0	0.211051	0	22
R-	v82	87	71.66	0.597701	3.97	25.96	15.3	3.90552	1	0.74	0.2	0	1.6	0	0.4	0	0	0.792485	2.85	22
RR	v82	147	52.12	0.646259	11.37	25.96	43.8	1.47532	0	0.4	0.44	1.68	0.96	0.56	0	0	0	0.256558	2.95	22
S-	v82	99	51.47	0.616162	5.09	25.96	19.61	3.14183	1	0.49	0.47	0.12	0	0	0.6	0	0	0.534007	2.59	22
SS	v82	42	79.41	0.785714	2.03	25.96	7.83	10.0297	1	0.81	0.16	0	0	0	0	0	0	0.903959	2.35	22
X-	v82	201	1.47	0.597015	2.67	25.96	10.3	5.79867	1	0.35	0.61	0	0.08	0.08	0.56	0	0	0.979514	2.36	22
XX	v82	29	90.55	0.655172	11.59	25.96	44.65	1.46722	0	0.83	0.09	0.08	0.4	0.88	0.08	0	0	1.78431	3.45	22
Y-	v82	88	71.34	0.647727	12.8	25.96	49.31	1.31361	0	0.63	0.15	1.04	2.56	3.52	0.16	0	0	0.338769	3.04	22
_B	v87	101	0	0.683168	12.09	36.06	33.54	2.03718	1	0.15	0.73	0.72	0.72	2.28	0	0	0	0.331227	3.19	26
_D	v87	79	4.82	0.683544	8.95	36.06	24.83	2.75296	1	0.64	0.31	0	0.36	0	0.12	0	0	0.878004	3.24	26
_G	v87	193	0	0.61658	12.06	36.06	33.43	1.84437	1	0.4	0.54	0.4	1.52	0.72	0.16	0	0	0.438374	3.25	26
_L	v87	212	0.47	0.589623	11.82	36.06	32.78	1.79858	1	0.37	0.51	0.08	0.88	3.36	0.4	0	0	0.360622	3.08	26
_O	v87	93	11.43	0.634409	10.74	36.06	29.78	2.13028	1	0.49	0.47	0	0.12	0.24	2.28	0	0	1.43013	3.55	26
_R	v87	395	0	0.56962	4.32	36.06	11.99	4.75168	1	0.09	0.83	0	0.08	0	0.64	0	0	0.242753	2.8	26
_S	v87	160	0.62	0.64375	12.53	36.06	34.75	1.85254	0	0.48	0.37	0.24	0.72	2.24	0.16	0	0	0.264967	3.34	26
_Y	v87	180	5.76	0.622222	13.01	36.06	36.08	1.7247	0	0.36	0.51	0.16	0.4	0.64	1.6	0	0	0.44884	3.31	26
B-	v87	110	8.33	0.627273	14.23	36.06	39.45	1.59015	0	0.59	0.3	0.16	0.88	2.16	0.24	0	0	0.685825	3.49	26
BB	v87	197	1.01	0.583756	9.95	36.06	27.6	2.11542	1	0.05	0.62	6	0.36	0.6	0.72	0	0	0.752607	3.04	26
DD	v87	95	29.63	0.6	4.75	36.06	13.18	4.55087	1	0.57	0.4	0	0	0	0	0	0	2.76406	3.47	26
G-	v87	181	0	0.558011	5.29	36.06	14.67	3.80352	1	0.13	0.74	0.48	0.12	1.44	0.12	0	0	1.23516	2.86	26
GG	v87	29	36.96	0.862069	2.66	36.06	7.39	11.6712	1	0.89	0.09	0	0.32	0	0	0	0	1.98595	3.55	26
L-	v87	121	4.72	0.719008	15.21	36.06	42.18	1.70472	0	0.35	0.42	0.48	2.04	3.48	0.72	0	0	0.236561	3.23	26
O-	v87	247	0	0.550607	5.11	36.06	14.18	3.8828	1	0.19	0.71	0.08	0	1.2	0.72	0	0	0.969436	2.72	26
OO	v87	205	5.96	0.604878	13.17	36.06	36.52	1.65607	0	0.33	0.53	0.48	0.72	1.28	0.88	0	0	0.893949	3.34	26
PQ	v87	143	7.14	0.622378	12.5	36.06	34.66	1.79576	0	0.45	0.39	3.76	0.48	1.92	0.24	2	1	0.116775	3.34	26
Q	v87	276	0.36	0.565217	11.07	36.06	30.71	1.84053	1	0.17	0.66	0.4	0.88	0.16	0.56	1	0	0.723924	0	26
RB	v87	123	0	0.626016	11.38	36.06	31.55	1.98389	1	0.35	0.51	0	0.72	3.96	0.24	0	0	1.02205	2.68	26
RG	v87	169	0.59	0.686391	11.36	36.06	31.49	2.17984	1	0.14	0.74	0.36	0.12	0.6	4.2	0	0	0.653732	2.99	26
RL	v87	17	0	0.705882	4.44	36.06	12.32	5.73169	1	0.74	0.26	0	0	0	0.48	0	0	2.68421	2.44	26
RO	v87	174	1.69	0.666667	16.07	36.06	44.56	1.49617	0	0.47	0.42	0.32	1.12	0.24	0.08	0	0	0.241825	3.17	26
RR	v87	142	0.7	0.626761	6.39	36.06	17.72	3.53784	1	0.34	0.59	0	0.24	1.2	0.32	0	0	1.67285	3.07	26
RY	v87	123	1.6	0.617886	11.09	36.06	30.74	2.01	1	0.61	0.36	0.16	0.16	1.28	0.08	0	0	0.352696	2.87	26
X-	v87	288	1.03	0.559028	5.79	36.06	16.07	3.47942	1	0.08	0.8	0.32	0	0.56	0	0	0	0.804861	2.61	26
Y-	v87	33	17.5	0.666667	5.18	36.06	14.36	4.64402	1	0.81	0.18	0.12	0	0	0	0	0	1.26888	2.92	26
_B	v72	83	15.31	0.650602	14.49	31.75	45.63	1.42572	0	0.59	0.25	0.48	0.64	0.56	0.48	0	0	0.401032	2.88	30
_D	v72	185	5.61	0.578378	13.46	31.75	42.39	1.36435	0	0.35	0.57	0.95	0.24	0	0.08	0	0	0.170646	2.92	30
_G	v72	142	2.07	0.577465	11.02	31.75	34.71	1.66382	1	0.42	0.49	0.08	0.24	0.64	0.16	0	0	0.791678	3.03	30
_L	v72	165	20.29	0.618182	13.58	31.75	42.79	1.44479	0	0.29	0.59	6.91	0.4	0.64	0.64	0	0	0.246946	2.64	30
_O	v72	26	3.7	0.730769	4.93	31.75	15.52	4.70846	1	0.68	0.24	0	0.72	0	1.2	0	0	2.55479	3.71	30
_R	v72	156	6.02	0.596154	11.55	31.75	36.37	1.63918	1	0.4	0.46	1.67	0.64	1.27	0.08	0	0	0.149817	2.75	30
_S	v72	191	9.05	0.591623	12.13	31.75	38.21	1.54843	0	0.3	0.57	0.64	1.59	0.64	0.79	0	0	0.682689	2.92	30
_W	v72	57	36.67	0.701754	8.21	31.75	25.87	2.71265	1	0.71	0.27	0	0.72	0.24	0.24	0	0	0.763235	3.14	30
_X	v72	163	10.93	0.567073	10.01	31.75	31.53	1.7986	1	0.32	0.51	0.95	1.67	1.83	0.79	0	0	0.568335	2.65	30
B-	v72	98	26.87	0.581633	10.73	31.75	33.81	1.72035	1	0.52	0.39	0.48	0.4	0.16	0.32	0	0	1.4893	2.91	30
G-	v72	20	0	0.95	5.42	31.75	17.07	5.56431	1	0.78	0.2	0	0	0	0	0	0	1.90525	3.02	30
GG	v72	56	8.2	0.785714	13.5	31.75	42.54	1.84705	1	0.68	0.26	0	0	0	0	0	0	0.617001	3.07	30
O-	v72	135	3.57	0.607407	11.55	31.75	36.39	1.66924	1	0.39	0.42	1.27	0.95	2.15	0.32	0	0	0.246124	2.85	30
OO	v72	109	9.17	0.697248	11.78	31.75	37.11	1.87885	1	0.48	0.44	0.16	0.95	1.67	0.16	0	0	0.710868	2.86	30
PQ	v72	233	2.51	0.549669	7.87	31.75	24.78	2.21863	1	0.2	0.54	4.21	1.51	0.87	1.59	2	1	1.03341	2.71	30
Q	v72	299	0.33	0.541806	8.97	31.75	28.24	1.91846	1	0.05	0.67	0.4	4.61	0	2.7	1	0	0.792306	0	30
RD	v72	79	1.25	0.632911	12.12	31.75	38.19	1.65735	0	0.69	0.27	0	0	0	0.64	0	0	0.951789	2.73	30
RG	v72	106	0	0.641509	8.08	31.75	25.44	2.52154	1	0.63	0.35	0	0.56	0	0	0	0	1.16873	2.77	30
RL	v72	104	31.58	0.644231	6.96	31.75	21.91	2.93998	1	0.48	0.48	0.16	0	0.16	0.64	0	0	2.10799	2.78	30
RO	v72	104	43.78	0.615385	14.35	31.75	45.22	1.36099	0	0.38	0.5	0.48	0.79	1.51	0.4	0	0	0.235733	2.9	30
RR	v72	185	0.54	0.556757	6.98	31.75	21.98	2.53267	1	0.37	0.52	0.32	0.08	0.08	0.24	0	0	0.783693	2.48	30
RW	v72	98	1.01	0.72449	11.1	31.75	34.97	2.07153	1	0.6	0.33	0.08	0	0	0.08	0	0	1.46495	3.34	30
RX	v72	54	0	0.648148	4.31	31.75	13.58	4.77317	1	0.42	0.56	0	0	0	0	0	0	1.25307	2.8	30
RY	v72	109	29.22	0.706422	13.54	31.75	42.65	1.65637	1	0.52	0.43	0.08	2.31	0.16	0.48	0	0	0.52771	3.01	30
S-	v72	97	28.15	0.56701	12.99	31.75	40.93	1.38535	0	0.55	0.33	0.4	0.95	0.48	0.16	0	0	0.415627	3.08	30
SS	v72	8	20	0.875	0.95	31.75	2.99	29.2668	1	0.84	0.1	0	0	0	0	0	0	2.52256	2.94	30
W-	v72	153	10	0.555556	9.97	31.75	31.4	1.76919	1	0.44	0.49	0.32	0.16	0.16	0.32	0	0	0.381554	2.59	30
XX	v72	141	23.37	0.609929	13.8	31.75	43.48	1.40278	0	0.32	0.58	0	0.4	0.32	2.94	0	0	0.9972	3.01	30
Y-	v72	25	0	0.44	5.37	31.75	16.91	2.60265	1	0.74	0.22	0.24	0.24	0	0	0	0	0.900348	1.98	30
YR	v72	37	0	0.783784	10.99	31.75	34.62	2.26408	1	0.77	0.22	0	0	0	0	0	0	1.57913	2.89	30
_D	v99	188	2.08	0.659574	14.41	36.86	39.09	1.68736	1	0.34	0.54	0.32	0.88	0.48	0.56	0	0	0.814858	3.09	36
_G	v99	94	1.05	0.585106	14.53	36.86	39.43	1.48395	0	0.7	0.24	0	0.56	0.16	0	0	0	0.502851	3.3	36
_L	v99	54	1.82	0.611111	9.31	36.86	25.26	2.41943	1	0.84	0.1	0	0.72	0	0	0	0	1.95846	3.17	36
_O	v99	201	11.06	0.41791	14.51	36.86	39.36	1.06188	0	0.33	0.57	0.16	1.84	0.48	0	0	0	1.04204	3.15	36
_R	v99	28	6.67	0.678571	8.92	36.86	24.19	2.80461	1	0.8	0.2	0	0	0	0	0	0	1.24733	3.18	36
_S	v99	104	1.89	0.663462	16.93	36.86	45.92	1.44475	0	0.55	0.31	0.16	1.44	0.32	0.08	0	0	0.497975	3.45	36
_W	v99	120	0	0.658333	12.54	36.86	34.01	1.93574	1	0.54	0.34	0.24	1.04	0.24	0.08	0	0	0.992082	3.48	36
_X	v99	110	2.65	0.654545	13.34	36.86	36.2	1.80832	1	0.61	0.28	0.32	0.8	0	0.4	0	0	0.353811	3.07	36
B-	v99	148	3.9	0.635135	12.01	36.86	32.59	1.94914	1	0.47	0.41	0.08	0.72	0	0.24	0	0	0.974055	3.26	36
BR	v99	31	3.13	0.741935	11.07	36.86	30.04	2.47012	1	0.66	0.3	0	0.24	0	0	0	0	0.994899	2.77	36
D-	v99	70	1.41	0.642857	7.57	36.86	20.54	3.12938	1	0.26	0.64	0.24	1.2	0	0.24	0	0	0.868917	2.56	36
DD	v99	32	11.11	0.4375	13.04	36.86	35.37	1.23699	0	0.88	0.09	0	0.24	0	0	0	0	1.62209	3.33	36
L-	v99	223	1.33	0.61435	10.72	36.86	29.09	2.11166	1	0.25	0.69	0.08	0.24	0	0	0	0	0.215709	3.06	36
LL	v99	84	5.62	0.642857	14.43	36.86	39.14	1.64256	0	0.58	0.36	0	1.56	0	0.24	0	0	1.04432	3.39	36
O-	v99	15	6.25	0.666667	4.04	36.86	10.95	6.08901	1	0	0	0	0	0	0	0	0	1.60903	3.86	36
PQ	v99	191	15.11	0.557292	8.13	36.86	22.05	2.52716	1	0.28	0.47	5.6	0.48	0.16	0.64	2	1	3.21896	3.25	36
Q	v99	285	6.86	0.564912	10.13	36.86	27.47	2.0563	1	0.06	0.58	3.44	0.8	0	0.72	1	0	1.25479	0	36
R-	v99	132	1.49	0.606061	9.74	36.86	26.42	2.29355	1	0.55	0.35	0.08	0.32	0.32	0	0	0	1.56958	3.45	36
RL	v99	156	5.45	0.762821	6.71	36.86	18.19	4.19264	1	0.23	0.71	0	0.36	0	0	0	0	1.02664	2.82	36
RO	v99	88	9.28	0.75	15.81	36.86	42.88	1.74905	1	0.62	0.31	0	0.16	0.08	0.08	0	0	0.186421	3.51	36
RR	v99	20	4.76	0.75	12.23	36.86	33.17	2.26135	0	0.66	0.24	0.24	0	0	0.24	0	0	0.848887	3.29	36
RS	v99	176	6.38	0.636364	14.09	36.86	38.23	1.66451	1	0.33	0.57	0.08	0.8	0	0	0	0	0.43488	3.49	36
RW	v99	144	1.37	0.710345	14.35	36.86	38.92	1.82524	1	0.28	0.6	0	0.36	0	1.08	0	0	1.05252	3.43	36
RX	v99	94	18.26	0.757895	15.79	36.86	42.85	1.76878	1	0.63	0.31	0.08	0.4	0	0.16	0	0	0.299857	3.34	36
RY	v99	219	2.67	0.56621	8.46	36.86	22.96	2.46633	1	0.22	0.71	0	0.08	0	0	0	0	0.902819	2.83	36
S-	v99	42	14.29	0.738095	14.11	36.86	38.27	1.92887	1	0.77	0.16	0	0.24	0	0	0	0	0.690997	3.91	36
SS	v99	193	2.03	0.580311	14.22	36.86	38.57	1.50456	1	0.4	0.39	5.76	2.08	0.16	0.32	0	0	1.18967	3.09	36
W-	v99	103	2.83	0.563107	12.6	36.86	34.19	1.64721	1	0.64	0.28	0.16	0.8	0.16	0	0	0	1.15474	3.11	36
X-	v99	101	3.81	0.55	13.94	36.86	37.81	1.4548	0	0.42	0.52	0.84	1.32	0	0.12	0	0	0.728609	3.04	36
XX	v99	6	25	1	4.86	36.86	13.18	7.58716	1	0.86	0.1	0	0	0	0	0	0	3.19202	3.42	36
Y-	v99	273	2.15	0.531136	11.38	36.86	30.86	1.72114	1	0.13	0.81	0.08	0	0.08	0	0	0	0.636936	2.9	36
YB	v99	204	0	0.534314	8.4	36.86	22.78	2.34549	1	0.09	0.89	0	0.12	0	0	0	0	0.127396	2.73	36
YD	v99	83	0	0.686747	6.38	36.86	17.31	3.96647	1	0.12	0.86	0.24	0	0	0	0	0	1.12612	2.76	36
YR	v99	289	2.36	0.506944	3.82	36.86	10.38	4.88538	1	0.13	0.75	0.16	0.4	0	0	0	0	0.253193	2.71	36
YS	v99	85	1.16	0.647059	7.15	36.86	19.41	3.3338	1	0.14	0.84	0	0.72	0	0.96	0	0	0.584363	3.05	36
YW	v99	42	0	0.642857	1.75	36.86	4.74	13.5643	1	0.6	0.38	0.24	0	0	0.24	0	0	1.19854	3.08	36
_B	v14	189	1	0.634921	6.24	23	27.12	2.34132	1	0.25	0.6	0.79	1.75	2.54	0.64	0	0	0.450562	2.82	20
_D	v14	59	3	0.559322	7.43	23	32.3	1.73154	0	0.71	0.23	0.79	0.95	0.16	0.32	0	0	0.473302	2.8	20
_O	v14	169	1	0.615385	6.84	23	29.72	2.07	1	0.39	0.46	0.32	1.11	0	0.32	0	0	0.671201	2.74	20
PQ	v14	7	0	0.571429	14.32	23	62.24	0.92	0	0.97	0.02	0	0.08	0	0.24	2	1	0.300514	2.47	20
_W	v14	239	5	0.615063	8.68	23	37.72	1.6306	0	0.15	0.74	1.59	0.87	0.64	0.72	0	0	0.827717	2.84	20
_X	v14	98	16	0.561224	6.61	23	28.72	1.9541	0	0.49	0.32	2.31	3.58	0.48	0.4	0	0	0.900323	2.82	20
DD	v14	99	22	0.747475	8.91	23	38.72	1.93	0	0.55	0.38	0.08	2.07	0.4	0.4	0	0	1.21835	2.75	20
G-	v14	93	0	0.634409	7.04	23	30.62	2.07	1	0.52	0.43	0	1.43	0	0	0	0	0.175853	2.6	20
GG	v14	174	0	0.689655	3.92	23	17.02	4.05104	1	0.41	0.55	0	0.08	0	0	0	0	0.321021	2.8	20
L-	v14	145	5	0.662069	8.05	23	35	1.89	0	0.43	0.47	0.56	1.27	1.75	0.08	0	0	0.311768	2.57	20
LL	v14	154	5	0.512987	6.76	23	29.4	1.75	0	0.45	0.42	0.24	0.87	0.56	0.4	0	0	0.227695	2.89	20
O-	v14	81	8	0.617284	8.28	23	35.99	1.71518	0	0.61	0.23	0.56	3.74	3.66	0.08	0	0	0.312361	2.62	20
OO	v14	245	11	0.644898	7.9	23	34.35	1.87762	1	0.15	0.67	4.21	0.32	2.23	0.48	0	0	1.18754	2.06	20
Q	v14	301	1	0.591362	10	23	43.47	1.36	0	0.01	0.77	1.75	0.87	0	2.31	1	0	0.870258	0	20
RY	v14	71	0	0.690141	3.25	23	14.12	4.89	1	0.24	0.74	0	0	0	0	0	0	1.01113	2.73	20
S-	v14	69	13	0.666667	7.2	23	31.29	2.13	1	0.64	0.29	2.07	1.75	0.16	0.24	0	0	1.10218	2.68	20
SS	v14	218	1	0.568807	5.61	23	24.4	2.33085	1	0.29	0.65	0.08	0.08	0	4.21	0	0	0.972312	2.67	20
X-	v14	193	29	0.673575	7.38	23	32.09	2.09926	1	0.17	0.62	5.72	0.87	5.25	0.24	0	0	0.586643	2.64	20
XX	v14	175	0	0.611429	6.08	23	26.42	2.31	1	0.27	0.68	0.48	0.32	1.19	0.64	0	0	0.423087	2.71	20
YY	v14	50	5	0.64	7.73	23	33.59	1.91	0	0.71	0.24	0.12	0.12	0	0.48	0	0	1.05162	3	20

## Sheet: overlap_allnests
nest	from	to	overlap_Y	DB	SC	ST	overlap_N
v72	_B	_B	1	0	0	0	0
v72	_B	_D	0.576642	0	0	0	0.423358
v72	_B	_G	0.445255	0	0.0795	0.07947	0.554745
v72	_B	_L	0.518248	0.0795	0.159	0.1589	0.481752
v72	_B	_O	0.109489	0	0	0	0.890511
v72	_B	_R	0.510949	0.0795	0	0	0.489051
v72	_B	_S	0.50365	0	0	0.1589	0.49635
v72	_B	_W	0.270073	0	0.0795	0.07947	0.729927
v72	_B	_X	0.452555	0	0.159	0.1589	0.547445
v72	_B	B-	0.343066	0	0	0	0.656934
v72	_B	G-	0.167883	0	0	0	0.832117
v72	_B	GG	0.445255	0	0	0	0.554745
v72	_B	O-	0.518248	0.0795	0.0795	0.07947	0.481752
v72	_B	OO	0.532847	0.0795	0.0795	0.07947	0.467153
v72	_B	PQ	0.277372	0	0.159	0.1589	0.722628
v72	_B	Q	0.226277	0.0795	0	0	0.773723
v72	_B	RD	0.49635	0	0.0795	0.07947	0.50365
v72	_B	RG	0.408759	0	0	0	0.591241
v72	_B	RL	0.160584	0	0	0	0.839416
v72	_B	RO	0.540146	0	0.0795	0.15894	0.459854
v72	_B	RR	0.291971	0	0.159	0.1589	0.708029
v72	_B	RW	0.489051	0	0.0795	0.07947	0.510949
v72	_B	RX	0.270073	0	0	0	0.729927
v72	_B	RY	0.40146	0	0	0	0.59854
v72	_B	S-	0.664234	0	0.159	0.23837	0.335766
v72	_B	SS	0.00729927	0	0	0	0.992701
v72	_B	W-	0.386861	0	0.0795	0.07947	0.613139
v72	_B	XX	0.459854	0	0	0	0.540146
v72	_B	Y-	0.160584	0.24	0	0	0.839416
v72	_B	YR	0.452555	0	0	0	0.547445
v72	_D	_B	0.663866	0	0.0795	0.15894	0.336134
v72	_D	_D	1	0	0	0	0
v72	_D	_G	0.529412	0	0	0	0.470588
v72	_D	_L	0.554622	0	0.0795	0.07947	0.445378
v72	_D	_O	0.176471	0	0	0	0.823529
v72	_D	_R	0.596639	0.159	0.0795	0.15894	0.403361
v72	_D	_S	0.521008	0	0	0	0.478992
v72	_D	_W	0.243697	0	0	0	0.756303
v72	_D	_X	0.462185	0	0.0795	0.07947	0.537815
v72	_D	B-	0.512605	0	0	0	0.487395
v72	_D	G-	0.184874	0	0	0	0.815126
v72	_D	GG	0.546218	0	0	0	0.453782
v72	_D	O-	0.697479	0	0	0.1589	0.302521
v72	_D	OO	0.403361	0	0	0.07947	0.596639
v72	_D	PQ	0.512605	0	0.0795	0.07947	0.487395
v72	_D	Q	0.378151	0.238	0	0	0.621849
v72	_D	RD	0.470588	0	0	0	0.529412
v72	_D	RG	0.176471	0.556	0.0795	0.07947	0.823529
v72	_D	RL	0.226891	0	0	0	0.773109
v72	_D	RO	0.655462	0	0.0795	0.39737	0.344538
v72	_D	RR	0.336134	0	0.0795	0.07947	0.663866
v72	_D	RW	0.470588	0	0.0795	0.07947	0.529412
v72	_D	RX	0.168067	0	0	0	0.831933
v72	_D	RY	0.571429	0	0	0	0.428571
v72	_D	S-	0.705882	0	0	0	0.294118
v72	_D	SS	0.00840336	0	0	0	0.991597
v72	_D	W-	0.512605	0	0	0.15894	0.487395
v72	_D	XX	0.487395	0	0.159	0.1589	0.512605
v72	_D	Y-	0.319328	0	0	0	0.680672
v72	_D	YR	0.327731	0	0	0	0.672269
v72	_G	_B	0.586538	0	0.0795	0.07947	0.413462
v72	_G	_D	0.605769	0	0	0	0.394231
v72	_G	_G	1	0	0	0.07947	0
v72	_G	_L	0.423077	0	0	0.07947	0.576923
v72	_G	_O	0.403846	0	0	0	0.596154
v72	_G	_R	0.413462	0	0	0.07947	0.586538
v72	_G	_S	0.375	0	0	0	0.625
v72	_G	_W	0.240385	0	0	0	0.759615
v72	_G	_X	0.557692	0	0.318	0.3179	0.442308
v72	_G	B-	0.538462	0	0	0	0.461538
v72	_G	G-	0.0384615	0	0	0	0.961538
v72	_G	GG	0.557692	0	0	0	0.442308
v72	_G	O-	0.461538	0	0	0	0.538462
v72	_G	OO	0.221154	0	0	0.1589	0.778846
v72	_G	PQ	0.471154	0	0.0795	0.23837	0.528846
v72	_G	Q	0.211538	0.0795	0	0	0.788462
v72	_G	RD	0.576923	0	0	0	0.423077
v72	_G	RG	0.192308	0	0	0	0.807692
v72	_G	RL	0.326923	0	0	0	0.673077
v72	_G	RO	0.538462	0	0	0	0.461538
v72	_G	RR	0.144231	0	0	0	0.855769
v72	_G	RW	0.480769	0	0	0	0.519231
v72	_G	RX	0.0865385	0	0	0	0.913462
v72	_G	RY	0.596154	0	0	0	0.403846
v72	_G	S-	0.615385	0	0.0795	0.07947	0.384615
v72	_G	SS	0	0	0	0	1
v72	_G	W-	0.528846	0	0	0	0.471154
v72	_G	XX	0.384615	0	0	0	0.615385
v72	_G	Y-	0.269231	0	0	0	0.730769
v72	_G	YR	0.230769	0	0	0	0.769231
v72	_L	_B	0.586777	0.318	0.238	0.9536	0.413223
v72	_L	_D	0.545455	0.0795	0	0.1589	0.454545
v72	_L	_G	0.363636	0	0	0	0.636364
v72	_L	_L	1	0	0	0	0
v72	_L	_O	0.0330579	0.24	0	0.24	0.966942
v72	_L	_R	0.719008	0.238	0.238	0.5563	0.280992
v72	_L	_S	0.487603	0.397	0.159	0.23837	0.512397
v72	_L	_W	0.347107	0.159	0	0.07947	0.652893
v72	_L	_X	0.355372	0.874	0.318	0.5563	0.644628
v72	_L	B-	0.239669	0	0.0795	0.31787	0.760331
v72	_L	G-	0.140496	0	0	0	0.859504
v72	_L	GG	0.404959	0	0.238	0.2384	0.595041
v72	_L	O-	0.586777	0.397	0.0795	0.23837	0.413223
v72	_L	OO	0.603306	0.238	0.318	0.7153	0.396694
v72	_L	PQ	0.264463	0.874	0.477	0.7947	0.735537
v72	_L	Q	0.545455	0.238	0	0	0.454545
v72	_L	RD	0.380165	0	0	0	0.619835
v72	_L	RG	0.38843	0	0	0	0.61157
v72	_L	RL	0.0909091	0	0.0795	0.07947	0.909091
v72	_L	RO	0.727273	0.318	0.238	0.31787	0.272727
v72	_L	RR	0.404959	0	0.238	0.3973	0.595041
v72	_L	RW	0.256198	0	0	0.1589	0.743802
v72	_L	RX	0.280992	0	0	0	0.719008
v72	_L	RY	0.380165	2.07	0.318	0.3179	0.619835
v72	_L	S-	0.446281	0.397	0.0795	0.39737	0.553719
v72	_L	SS	0.0661157	0	0	0	0.933884
v72	_L	W-	0.504132	0.159	0	0	0.495868
v72	_L	XX	0.471074	0	0.159	0.1589	0.528926
v72	_L	Y-	0.272727	0	0	0	0.727273
v72	_L	YR	0.553719	0	0	0	0.446281
v72	_O	_B	0.294118	0	0	0	0.705882
v72	_O	_D	0.411765	0	0	0	0.588235
v72	_O	_G	0.823529	0	0	0	0.176471
v72	_O	_L	0.0784314	0	0	0	0.921569
v72	_O	_O	1	0	0	0	0
v72	_O	_R	0.0980392	0	0	0	0.901961
v72	_O	_S	0.215686	0	0	0	0.784314
v72	_O	_W	0.392157	0	0	0	0.607843
v72	_O	_X	0.392157	0	0	0	0.607843
v72	_O	B-	0.647059	0	0	0	0.352941
v72	_O	G-	0	0	0	0	1
v72	_O	GG	0.901961	0	0	0	0.0980392
v72	_O	O-	0.313725	0	0	0	0.686275
v72	_O	OO	0	0	0	0	1
v72	_O	PQ	0.313725	0	0.24	0.24	0.686275
v72	_O	Q	0	0	0	0	1
v72	_O	RD	0.764706	0	0	0	0.235294
v72	_O	RG	0	0	0	0	1
v72	_O	RL	0.72549	0	0	0	0.27451
v72	_O	RO	0.176471	0	0	0	0.823529
v72	_O	RR	0.0392157	0	0	0	0.960784
v72	_O	RW	0.627451	0	0	0	0.372549
v72	_O	RX	0	0	0	0	1
v72	_O	RY	0.941176	0	0	0	0.0588235
v72	_O	S-	0.666667	0	0	0	0.333333
v72	_O	SS	0	0	0	0	1
v72	_O	W-	0.333333	0	0	0	0.666667
v72	_O	XX	0.45098	0	0	0	0.54902
v72	_O	Y-	0.0588235	0	0	0	0.941176
v72	_O	YR	0	0	0	0	1
v72	_R	_B	0.686275	0	0.556	1.0331	0.313725
v72	_R	_D	0.696078	0	0.159	0.23837	0.303922
v72	_R	_G	0.421569	0.159	0	0	0.578431
v72	_R	_L	0.852941	0.159	0	0.1589	0.147059
v72	_R	_O	0.0490196	0.24	0	0	0.95098
v72	_R	_R	1	0	0	0	0
v72	_R	_S	0.578431	0.238	0.159	0.3973	0.421569
v72	_R	_W	0.27451	0	0	0.07947	0.72549
v72	_R	_X	0.470588	0	0.0795	0.23837	0.529412
v72	_R	B-	0.382353	0.238	0	0	0.617647
v72	_R	G-	0.107843	0	0.0795	0.07947	0.892157
v72	_R	GG	0.45098	0	0.0795	0.07947	0.54902
v72	_R	O-	0.676471	0	0.159	0.23837	0.323529
v72	_R	OO	0.509804	0.159	0.0795	0.15894	0.490196
v72	_R	PQ	0.421569	0.159	0.0795	0.07947	0.578431
v72	_R	Q	0.558824	0.159	0	0	0.441176
v72	_R	RD	0.303922	0	0.159	0.1589	0.696078
v72	_R	RG	0.382353	0	0.238	0.2384	0.617647
v72	_R	RL	0.196078	0	0	0	0.803922
v72	_R	RO	0.803922	0	0.159	0.23837	0.196078
v72	_R	RR	0.460784	0	0.238	0.2384	0.539216
v72	_R	RW	0.313725	0	0.159	0.1589	0.686275
v72	_R	RX	0.215686	0	0	0	0.784314
v72	_R	RY	0.372549	0.0795	0	0	0.627451
v72	_R	S-	0.558824	0.0795	0	0.1589	0.441176
v72	_R	SS	0.0196078	0	0	0	0.980392
v72	_R	W-	0.539216	0	0	0.07947	0.460784
v72	_R	XX	0.539216	0.159	0.318	0.5563	0.460784
v72	_R	Y-	0.333333	0	0	0	0.666667
v72	_R	YR	0.421569	0	0	0	0.578431
v72	_S	_B	0.610619	0	0.0795	0.87417	0.389381
v72	_S	_D	0.548673	0	0.0795	0.07947	0.451327
v72	_S	_G	0.345133	0	0.0795	0.15894	0.654867
v72	_S	_L	0.522124	0	0.0795	0.15894	0.477876
v72	_S	_O	0.0973451	0.24	0	0	0.902655
v72	_S	_R	0.522124	0	0	0	0.477876
v72	_S	_S	1	0	0	0	0
v72	_S	_W	0.212389	0	0	0.07947	0.787611
v72	_S	_X	0.548673	0	0	0.07947	0.451327
v72	_S	B-	0.504425	0	0	0	0.495575
v72	_S	G-	0.362832	0	0	0	0.637168
v72	_S	GG	0.681416	0	0	0.07947	0.318584
v72	_S	O-	0.442478	0	0	0.07947	0.557522
v72	_S	OO	0.575221	0	0	0	0.424779
v72	_S	PQ	0.336283	0	0.0795	0.15894	0.663717
v72	_S	Q	0.380531	0.556	0	0	0.619469
v72	_S	RD	0.19469	0	0	0	0.80531
v72	_S	RG	0.477876	0	0	0	0.522124
v72	_S	RL	0.141593	0	0	0	0.858407
v72	_S	RO	0.787611	0	0	0.1589	0.212389
v72	_S	RR	0.159292	0	0	0	0.840708
v72	_S	RW	0.424779	0	0	0	0.575221
v72	_S	RX	0.0884956	0	0	0	0.911504
v72	_S	RY	0.557522	0	0	0	0.442478
v72	_S	S-	0.60177	0	0	0.07947	0.39823
v72	_S	SS	0.0884956	0	0	0	0.911504
v72	_S	W-	0.318584	0	0.0795	0.07947	0.681416
v72	_S	XX	0.831858	0	0	0	0.168142
v72	_S	Y-	0.300885	0	0	0	0.699115
v72	_S	YR	0.380531	0	0	0	0.619469
v72	_W	_B	0.381443	0	0	0	0.618557
v72	_W	_D	0.298969	0	0	0	0.701031
v72	_W	_G	0.257732	0	0	0	0.742268
v72	_W	_L	0.43299	0	0	0	0.56701
v72	_W	_O	0.206186	0	0	0	0.793814
v72	_W	_R	0.28866	0	0	0	0.71134
v72	_W	_S	0.247423	0	0	0	0.752577
v72	_W	_W	1	0	0	0	0
v72	_W	_X	0.175258	0	0	0	0.824742
v72	_W	B-	0.391753	0	0	0	0.608247
v72	_W	G-	0.0206186	0	0	0	0.979381
v72	_W	GG	0.505155	0	0	0	0.494845
v72	_W	O-	0.257732	0	0	0	0.742268
v72	_W	OO	0.391753	0	0	0.07947	0.608247
v72	_W	PQ	0.103093	0	0	0	0.896907
v72	_W	Q	0.175258	0	0	0	0.824742
v72	_W	RD	0.546392	0	0	0	0.453608
v72	_W	RG	0.0515464	0	0	0	0.948454
v72	_W	RL	0.164948	0	0	0	0.835052
v72	_W	RO	0.226804	0	0	0.07947	0.773196
v72	_W	RR	0.185567	0	0	0	0.814433
v72	_W	RW	0.56701	0	0	0	0.43299
v72	_W	RX	0.329897	0	0	0	0.670103
v72	_W	RY	0.298969	0	0	0	0.701031
v72	_W	S-	0.298969	0	0	0	0.701031
v72	_W	SS	0	0	0	0	1
v72	_W	W-	0.113402	0	0	0	0.886598
v72	_W	XX	0.360825	0	0	0	0.639175
v72	_W	Y-	0.226804	0	0	0	0.773196
v72	_W	YR	0.402062	0	0	0	0.597938
v72	_X	_B	0.681319	0	0	0.1589	0.318681
v72	_X	_D	0.604396	0	0	0.07947	0.395604
v72	_X	_G	0.637363	0	0.0795	0.15894	0.362637
v72	_X	_L	0.472527	0	0	0.2384	0.527473
v72	_X	_O	0.21978	0	0	0	0.78022
v72	_X	_R	0.527473	0	0.0795	0.55627	0.472527
v72	_X	_S	0.681319	0	0.159	0.3178	0.318681
v72	_X	_W	0.186813	0	0.0795	0.07947	0.813187
v72	_X	_X	1	0	0	0	0
v72	_X	B-	0.648352	0	0.0795	0.15894	0.351648
v72	_X	G-	0.153846	0	0	0	0.846154
v72	_X	GG	0.692308	0	0.0795	0.07947	0.307692
v72	_X	O-	0.593407	0	0.0795	0.23837	0.406593
v72	_X	OO	0.362637	0.0795	0.159	0.3178	0.637363
v72	_X	PQ	0.615385	0	0.159	0.23837	0.384615
v72	_X	Q	0.428571	0.238	0	0	0.571429
v72	_X	RD	0.362637	0	0	0	0.637363
v72	_X	RG	0.395604	0	0.0795	0.07947	0.604396
v72	_X	RL	0.241758	0	0.159	0.23837	0.758242
v72	_X	RO	0.802198	0.238	0.238	0.7152	0.197802
v72	_X	RR	0.197802	0	0.556	0.63577	0.802198
v72	_X	RW	0.538462	0	0	0.07947	0.461538
v72	_X	RX	0.021978	0	0	0	0.978022
v72	_X	RY	0.461538	0	0	0	0.538462
v72	_X	S-	0.626374	0.238	0.0795	0.23837	0.373626
v72	_X	SS	0.010989	0	0	0	0.989011
v72	_X	W-	0.571429	0	0	0	0.428571
v72	_X	XX	0.725275	0	0.0795	0.23837	0.274725
v72	_X	Y-	0.461538	0	0	0	0.538462
v72	_X	YR	0.164835	0	0.159	0.1589	0.835165
v72	B-	_B	0.465347	0	0	0.2384	0.534653
v72	B-	_D	0.60396	0.0795	0	0.07947	0.39604
v72	B-	_G	0.554455	0	0.159	0.23837	0.445545
v72	B-	_L	0.287129	0	0	0	0.712871
v72	B-	_O	0.326733	0	0	0	0.673267
v72	B-	_R	0.386139	0	0	0	0.613861
v72	B-	_S	0.564356	0	0	0	0.435644
v72	B-	_W	0.376238	0	0	0.07947	0.623762
v72	B-	_X	0.584158	0	0.0795	0.23837	0.415842
v72	B-	B-	1	0	0	0	0
v72	B-	G-	0.0990099	0	0	0	0.90099
v72	B-	GG	0.70297	0	0	0	0.29703
v72	B-	O-	0.435644	0	0	0	0.564356
v72	B-	OO	0.19802	0	0.0795	0.15894	0.80198
v72	B-	PQ	0.514851	0	0	0	0.485149
v72	B-	Q	0.267327	0.397	0	0	0.732673
v72	B-	RD	0.39604	0	0	0	0.60396
v72	B-	RG	0.118812	0	0	0	0.881188
v72	B-	RL	0.425743	0	0	0	0.574257
v72	B-	RO	0.574257	0	0	0	0.425743
v72	B-	RR	0.0891089	0	0	0	0.910891
v72	B-	RW	0.663366	0	0	0.07947	0.336634
v72	B-	RX	0.00990099	0	0	0	0.990099
v72	B-	RY	0.643564	0	0	0.07947	0.356436
v72	B-	S-	0.574257	0	0	0	0.425743
v72	B-	SS	0	0	0	0	1
v72	B-	W-	0.376238	0	0	0	0.623762
v72	B-	XX	0.643564	0	0	0	0.356436
v72	B-	Y-	0.415842	0	0	0	0.584158
v72	B-	YR	0.0495049	0	0	0	0.950495
v72	G-	_B	0.348485	0	0	0	0.651515
v72	G-	_D	0.333333	0	0	0	0.666667
v72	G-	_G	0.0606061	0	0	0	0.939394
v72	G-	_L	0.257576	0	0	0	0.742424
v72	G-	_O	0	0	0	0	1
v72	G-	_R	0.166667	0	0	0	0.833333
v72	G-	_S	0.621212	0	0	0	0.378788
v72	G-	_W	0.030303	0	0	0	0.969697
v72	G-	_X	0.212121	0	0	0	0.787879
v72	G-	B-	0.151515	0	0	0	0.848485
v72	G-	G-	1	0	0	0	0
v72	G-	GG	0.454545	0	0	0	0.545455
v72	G-	O-	0.227273	0	0	0	0.772727
v72	G-	OO	0.469697	0	0	0	0.530303
v72	G-	PQ	0.0909091	0	0.24	0.24	0.909091
v72	G-	Q	0.181818	0	0	0	0.818182
v72	G-	RD	0.121212	0	0	0	0.878788
v72	G-	RG	0.393939	0	0	0	0.606061
v72	G-	RL	0.030303	0	0	0	0.969697
v72	G-	RO	0.454545	0	0	0	0.545455
v72	G-	RR	0.0606061	0	0	0	0.939394
v72	G-	RW	0.227273	0	0	0	0.772727
v72	G-	RX	0.151515	0	0	0	0.848485
v72	G-	RY	0.5	0	0	0	0.5
v72	G-	S-	0.469697	0	0	0	0.530303
v72	G-	SS	0.151515	0	0	0	0.848485
v72	G-	W-	0.030303	0	0	0	0.969697
v72	G-	XX	0.590909	0	0	0	0.409091
v72	G-	Y-	0.0606061	0	0	0	0.939394
v72	G-	YR	0.348485	0	0	0	0.651515
v72	GG	_B	0.462121	0	0	0.2376	0.537879
v72	GG	_D	0.492424	0	0	0	0.507576
v72	GG	_G	0.439394	0	0	0	0.560606
v72	GG	_L	0.371212	0	0	0.3564	0.628788
v72	GG	_O	0.348485	0	0	0	0.651515
v72	GG	_R	0.348485	0	0.119	0.1188	0.651515
v72	GG	_S	0.583333	0	0	0	0.416667
v72	GG	_W	0.371212	0	0	0	0.628788
v72	GG	_X	0.477273	0	0	0	0.522727
v72	GG	B-	0.537879	0	0	0	0.462121
v72	GG	G-	0.227273	0	0	0	0.772727
v72	GG	GG	1	0	0	0	0
v72	GG	O-	0.409091	0	0	0.1188	0.590909
v72	GG	OO	0.431818	0	0	0	0.568182
v72	GG	PQ	0.318182	0	0	0	0.681818
v72	GG	Q	0.257576	0	0	0	0.742424
v72	GG	RD	0.401515	0	0.119	0.1188	0.598485
v72	GG	RG	0.25	0	0	0	0.75
v72	GG	RL	0.272727	0	0	0	0.727273
v72	GG	RO	0.515152	0	0.119	0.1188	0.484848
v72	GG	RR	0.121212	0	0	0	0.878788
v72	GG	RW	0.575758	0	0	0	0.424242
v72	GG	RX	0.0909091	0	0	0	0.909091
v72	GG	RY	0.606061	0	0	0	0.393939
v72	GG	S-	0.583333	0	0	0	0.416667
v72	GG	SS	0.0378788	0	0	0	0.962121
v72	GG	W-	0.265152	0	0.119	0.1188	0.734848
v72	GG	XX	0.674242	0	0	0	0.325758
v72	GG	Y-	0.242424	0	0	0	0.757576
v72	GG	YR	0.227273	0	0	0	0.772727
v72	O-	_B	0.651376	0	0.238	0.31787	0.348624
v72	O-	_D	0.761468	0	0.159	0.1589	0.238532
v72	O-	_G	0.440367	0	0.159	0.23837	0.559633
v72	O-	_L	0.651376	0	0	0.2384	0.348624
v72	O-	_O	0.146789	0	0	0	0.853211
v72	O-	_R	0.633028	0.0795	0.477	0.55627	0.366972
v72	O-	_S	0.458716	0.0795	0.0795	0.15894	0.541284
v72	O-	_W	0.229358	0.159	0	0	0.770642
v72	O-	_X	0.495413	0.0795	0.0795	0.15894	0.504587
v72	O-	B-	0.40367	0	0	0	0.59633
v72	O-	G-	0.137615	0	0	0	0.862385
v72	O-	GG	0.495413	0	0	0	0.504587
v72	O-	O-	1	0	0	0	0
v72	O-	OO	0.440367	0.238	0.159	0.23837	0.559633
v72	O-	PQ	0.522936	0.0795	0	0.07947	0.477064
v72	O-	Q	0.440367	0.159	0	0	0.559633
v72	O-	RD	0.623853	0	0	0	0.376147
v72	O-	RG	0.293578	0	0	0	0.706422
v72	O-	RL	0.201835	0	0.159	0.1589	0.798165
v72	O-	RO	0.651376	0.159	0.238	0.5563	0.348624
v72	O-	RR	0.40367	0.0795	0.159	0.1589	0.59633
v72	O-	RW	0.376147	0	0	0	0.623853
v72	O-	RX	0.284404	0	0	0	0.715596
v72	O-	RY	0.46789	0	0.0795	0.15894	0.53211
v72	O-	S-	0.651376	0.159	0.159	0.23837	0.348624
v72	O-	SS	0.0642202	0	0	0	0.93578
v72	O-	W-	0.53211	0	0.397	0.47687	0.46789
v72	O-	XX	0.46789	0	0	0.07947	0.53211
v72	O-	Y-	0.311927	0	0	0	0.688073
v72	O-	YR	0.40367	0	0	0	0.59633
v72	OO	_B	0.640351	0	0	0.2384	0.359649
v72	OO	_D	0.421053	0	0.0795	0.07947	0.578947
v72	OO	_G	0.201754	0	0	0	0.798246
v72	OO	_L	0.640351	0	0	0	0.359649
v72	OO	_O	0	0	0	0	1
v72	OO	_R	0.45614	0	0	0.07947	0.54386
v72	OO	_S	0.570175	0	0	0	0.429825
v72	OO	_W	0.333333	0	0	0	0.666667
v72	OO	_X	0.289474	0.0795	0	0	0.710526
v72	OO	B-	0.175439	0	0	0	0.824561
v72	OO	G-	0.27193	0	0	0	0.72807
v72	OO	GG	0.5	0	0	0	0.5
v72	OO	O-	0.421053	0	0	0.07947	0.578947
v72	OO	OO	1	0	0	0	0
v72	OO	PQ	0.0438596	0	0	0	0.95614
v72	OO	Q	0.324561	0.0795	0	0	0.675439
v72	OO	RD	0.333333	0	0	0	0.666667
v72	OO	RG	0.535088	0	0	0	0.464912
v72	OO	RL	0	0	0	0	1
v72	OO	RO	0.570175	0	0.0795	0.23837	0.429825
v72	OO	RR	0.254386	0	0	0	0.745614
v72	OO	RW	0.359649	0	0	0	0.640351
v72	OO	RX	0.307018	0	0	0	0.692982
v72	OO	RY	0.333333	0	0.0795	0.07947	0.666667
v72	OO	S-	0.473684	0	0	0	0.526316
v72	OO	SS	0.0877193	0	0	0	0.912281
v72	OO	W-	0.201754	0	0	0	0.798246
v72	OO	XX	0.605263	0	0	0	0.394737
v72	OO	Y-	0.157895	0	0	0	0.842105
v72	OO	YR	0.675439	0	0	0	0.324561
v72	PQ	_B	0.550725	0.159	0.0795	0.71527	0.449275
v72	PQ	_D	0.884058	0	0.238	0.31787	0.115942
v72	PQ	_G	0.710145	0.0795	0.159	0.1589	0.289855
v72	PQ	_L	0.463768	0	0	0.2384	0.536232
v72	PQ	_O	0.231884	0	0	0	0.768116
v72	PQ	_R	0.623188	0	0.477	0.55627	0.376812
v72	PQ	_S	0.550725	0.238	0.238	0.2384	0.449275
v72	PQ	_W	0.144928	0.238	0	0	0.855072
v72	PQ	_X	0.811594	0.556	0.795	0.9536	0.188406
v72	PQ	B-	0.753623	0	0.318	0.4768	0.246377
v72	PQ	G-	0.0869565	0	0	0	0.913043
v72	PQ	GG	0.608696	0	0.159	0.3178	0.391304
v72	PQ	O-	0.826087	0.477	0.238	0.31787	0.173913
v72	PQ	OO	0.0724638	0.0795	0.0795	0.07947	0.927536
v72	PQ	PQ	1	0	0	0	0
v72	PQ	Q	0.507246	2.07	0.0795	0.07947	0.492754
v72	PQ	RD	0.42029	0	0	0	0.57971
v72	PQ	RG	0.144928	0	0	0	0.855072
v72	PQ	RL	0.304348	0	0	0.07947	0.695652
v72	PQ	RO	0.826087	0	0.397	0.7153	0.173913
v72	PQ	RR	0.289855	0	0.238	0.2384	0.710145
v72	PQ	RW	0.463768	0	0.159	0.1589	0.536232
v72	PQ	RX	0	0	0	0	1
v72	PQ	RY	0.463768	0.0795	0.0795	0.23837	0.536232
v72	PQ	S-	0.594203	0.0795	0.477	0.6357	0.405797
v72	PQ	SS	0	0	0	0	1
v72	PQ	W-	0.710145	0	0	0	0.289855
v72	PQ	XX	0.57971	0.159	0	0.07947	0.42029
v72	PQ	Y-	0.57971	0	0	0	0.42029
v72	PQ	YR	0.0144928	0	0.0795	0.07947	0.985507
v72	Q	_B	0.402597	0	0	0.07947	0.597403
v72	Q	_D	0.584416	0.0795	0	0	0.415584
v72	Q	_G	0.285714	0	0	0	0.714286
v72	Q	_L	0.857143	0	0	0	0.142857
v72	Q	_O	0	0	0	0	1
v72	Q	_R	0.74026	0	0	0	0.25974
v72	Q	_S	0.558442	0.159	0	0.07947	0.441558
v72	Q	_W	0.220779	0	0	0	0.779221
v72	Q	_X	0.506494	0	0	0	0.493506
v72	Q	B-	0.350649	0.0795	0	0	0.649351
v72	Q	G-	0.155844	0	0	0	0.844156
v72	Q	GG	0.441558	0	0	0	0.558442
v72	Q	O-	0.623377	0	0	0	0.376623
v72	Q	OO	0.480519	0	0	0	0.519481
v72	Q	PQ	0.454545	0	0	0.07947	0.545455
v72	Q	Q	1	0	0	0	0
v72	Q	RD	0.272727	0	0	0	0.727273
v72	Q	RG	0.38961	0	0	0	0.61039
v72	Q	RL	0.155844	0	0	0.07947	0.844156
v72	Q	RO	0.896104	0	0	0.07947	0.103896
v72	Q	RR	0.545455	0	0	0	0.454545
v72	Q	RW	0.0649351	0	0	0.07947	0.935065
v72	Q	RX	0.116883	0	0	0	0.883117
v72	Q	RY	0.337662	0	0	0	0.662338
v72	Q	S-	0.337662	0	0	0	0.662338
v72	Q	SS	0.0649351	0	0	0	0.935065
v72	Q	W-	0.701299	0	0	0	0.298701
v72	Q	XX	0.623377	0	0	0	0.376623
v72	Q	Y-	0.467532	0	0	0	0.532468
v72	Q	YR	0.376623	0	0	0	0.623377
v72	RD	_B	0.581197	0	0	0.1589	0.418803
v72	RD	_D	0.478632	0	0	0	0.521368
v72	RD	_G	0.512821	0	0.0795	0.07947	0.487179
v72	RD	_L	0.393162	0	0	0	0.606838
v72	RD	_O	0.333333	0	0	0	0.666667
v72	RD	_R	0.264957	0	0.0795	0.07947	0.735043
v72	RD	_S	0.188034	0	0	0	0.811966
v72	RD	_W	0.452991	0	0	0	0.547009
v72	RD	_X	0.282051	0	0.0795	0.07947	0.717949
v72	RD	B-	0.34188	0	0	0	0.65812
v72	RD	G-	0.0683761	0	0	0	0.931624
v72	RD	GG	0.452991	0	0	0	0.547009
v72	RD	O-	0.581197	0	0	0.07947	0.418803
v72	RD	OO	0.324786	0	0	0	0.675214
v72	RD	PQ	0.247863	0	0	0.07947	0.752137
v72	RD	Q	0.179487	0	0	0	0.820513
v72	RD	RD	1	0	0	0	0
v72	RD	RG	0.162393	0	0	0	0.837607
v72	RD	RL	0.282051	0	0	0	0.717949
v72	RD	RO	0.273504	0	0	0	0.726496
v72	RD	RR	0.25641	0	0	0	0.74359
v72	RD	RW	0.452991	0	0	0	0.547009
v72	RD	RX	0.376068	0	0	0	0.623932
v72	RD	RY	0.504274	0	0	0	0.495726
v72	RD	S-	0.581197	0	0	0	0.418803
v72	RD	SS	0.0512821	0	0	0	0.948718
v72	RD	W-	0.358974	0	0.0795	0.07947	0.641026
v72	RD	XX	0.239316	0	0	0	0.760684
v72	RD	Y-	0.136752	0	0	0	0.863248
v72	RD	YR	0.42735	0	0	0	0.57265
v72	RG	_B	0.691358	0	0.0795	0.07947	0.308642
v72	RG	_D	0.259259	0	0	0	0.740741
v72	RG	_G	0.246914	0	0	0	0.753086
v72	RG	_L	0.580247	0	0	0	0.419753
v72	RG	_O	0	0	0	0	1
v72	RG	_R	0.481481	0	0	0	0.518519
v72	RG	_S	0.666667	0	0	0	0.333333
v72	RG	_W	0.0617284	0	0	0	0.938272
v72	RG	_X	0.444444	0	0	0	0.555556
v72	RG	B-	0.148148	0	0	0	0.851852
v72	RG	G-	0.320988	0	0	0	0.679012
v72	RG	GG	0.407407	0	0	0	0.592593
v72	RG	O-	0.395062	0	0	0	0.604938
v72	RG	OO	0.753086	0	0	0	0.246914
v72	RG	PQ	0.123457	0	0.0795	0.23837	0.876543
v72	RG	Q	0.37037	0	0	0	0.62963
v72	RG	RD	0.234568	0	0	0	0.765432
v72	RG	RG	1	0	0	0	0
v72	RG	RL	0.037037	0	0	0	0.962963
v72	RG	RO	0.691358	0	0.0795	0.07947	0.308642
v72	RG	RR	0.308642	0	0	0	0.691358
v72	RG	RW	0.234568	0	0	0	0.765432
v72	RG	RX	0.209877	0	0	0	0.790123
v72	RG	RY	0.259259	0	0	0	0.740741
v72	RG	S-	0.432099	0	0	0	0.567901
v72	RG	SS	0.123457	0	0	0	0.876543
v72	RG	W-	0.358025	0	0	0	0.641975
v72	RG	XX	0.62963	0	0	0	0.37037
v72	RG	Y-	0.148148	0	0	0	0.851852
v72	RG	YR	0.567901	0	0	0	0.432099
v72	RL	_B	0.314286	0	0	0.1589	0.685714
v72	RL	_D	0.385714	0	0	0	0.614286
v72	RL	_G	0.485714	0	0	0	0.514286
v72	RL	_L	0.157143	0	0	0	0.842857
v72	RL	_O	0.528571	0	0	0	0.471429
v72	RL	_R	0.285714	0	0	0	0.714286
v72	RL	_S	0.228571	0.159	0.0795	0.07947	0.771429
v72	RL	_W	0.228571	0	0	0	0.771429
v72	RL	_X	0.314286	0	0	0.07947	0.685714
v72	RL	B-	0.614286	0	0	0	0.385714
v72	RL	G-	0.0285714	0	0	0	0.971429
v72	RL	GG	0.514286	0	0	0	0.485714
v72	RL	O-	0.314286	0	0	0.07947	0.685714
v72	RL	OO	0	0	0	0	1
v72	RL	PQ	0.3	0	0.0795	0.23837	0.7
v72	RL	Q	0.171429	0	0	0	0.828571
v72	RL	RD	0.471429	0	0	0	0.528571
v72	RL	RG	0.0428571	0	0	0	0.957143
v72	RL	RL	1	0	0	0	0
v72	RL	RO	0.271429	0	0	0	0.728571
v72	RL	RR	0.142857	0	0	0	0.857143
v72	RL	RW	0.542857	0	0	0	0.457143
v72	RL	RX	0	0	0	0	1
v72	RL	RY	0.8	0	0	0	0.2
v72	RL	S-	0.457143	0	0	0	0.542857
v72	RL	SS	0	0	0	0	1
v72	RL	W-	0.3	0	0	0	0.7
v72	RL	XX	0.457143	0	0	0	0.542857
v72	RL	Y-	0.142857	0	0	0	0.857143
v72	RL	YR	0	0	0	0	1
v72	RO	_B	0.582677	0.159	0.318	0.7947	0.417323
v72	RO	_D	0.614173	0	0.0795	0.07947	0.385827
v72	RO	_G	0.440945	0	0.0795	0.15894	0.559055
v72	RO	_L	0.692913	0.0795	0.0795	0.07947	0.307087
v72	RO	_O	0.0708661	0	0	0	0.929134
v72	RO	_R	0.645669	0	0	0	0.354331
v72	RO	_S	0.700787	0	0	0	0.299213
v72	RO	_W	0.173228	0	0.0795	0.07947	0.826772
v72	RO	_X	0.574803	0	0	0.07947	0.425197
v72	RO	B-	0.456693	0	0.0795	0.07947	0.543307
v72	RO	G-	0.23622	0	0	0	0.76378
v72	RO	GG	0.535433	0	0.0795	0.19827	0.464567
v72	RO	O-	0.559055	0	0	0	0.440945
v72	RO	OO	0.511811	0	0	0.07947	0.488189
v72	RO	PQ	0.448819	0	0.0795	0.07947	0.551181
v72	RO	Q	0.543307	0.0795	0	0	0.456693
v72	RO	RD	0.251969	0	0	0	0.748031
v72	RO	RG	0.440945	0	0.0795	0.15894	0.559055
v72	RO	RL	0.149606	0	0	0	0.850394
v72	RO	RO	1	0	0	0	0
v72	RO	RR	0.267717	0	0.0795	0.07947	0.732283
v72	RO	RW	0.299213	0	0.0795	0.07947	0.700787
v72	RO	RX	0.102362	0	0	0	0.897638
v72	RO	RY	0.496063	0	0	0.07947	0.503937
v72	RO	S-	0.511811	0.0795	0.0795	0.15894	0.488189
v72	RO	SS	0.0708661	0	0	0	0.929134
v72	RO	W-	0.503937	0	0	0	0.496063
v72	RO	XX	0.661417	0.0795	0.0795	0.15894	0.338583
v72	RO	Y-	0.354331	0	0	0	0.645669
v72	RO	YR	0.401575	0	0	0	0.598425
v72	RR	_B	0.666667	0	0	0.3179	0.333333
v72	RR	_D	0.666667	0	0	0	0.333333
v72	RR	_G	0.25	0	0	0	0.75
v72	RR	_L	0.816667	0	0.0795	0.23837	0.183333
v72	RR	_O	0.0333333	0	0	0	0.966667
v72	RR	_R	0.783333	0	0.0795	0.23837	0.216667
v72	RR	_S	0.3	0	0.0795	0.07947	0.7
v72	RR	_W	0.3	0.0795	0	0.07947	0.7
v72	RR	_X	0.3	0	0	0.07947	0.7
v72	RR	B-	0.15	0	0	0	0.85
v72	RR	G-	0.0666667	0	0	0	0.933333
v72	RR	GG	0.266667	0	0	0	0.733333
v72	RR	O-	0.733333	0	0	0.1589	0.266667
v72	RR	OO	0.483333	0	0	0	0.516667
v72	RR	PQ	0.333333	0.238	0	0.07947	0.666667
v72	RR	Q	0.7	0	0	0	0.3
v72	RR	RD	0.5	0	0	0	0.5
v72	RR	RG	0.416667	0	0	0	0.583333
v72	RR	RL	0.166667	0	0	0	0.833333
v72	RR	RO	0.566667	0	0	0.1589	0.433333
v72	RR	RR	1	0	0	0	0
v72	RR	RW	0.25	0	0	0	0.75
v72	RR	RX	0.333333	0	0	0	0.666667
v72	RR	RY	0.183333	0	0	0.07947	0.816667
v72	RR	S-	0.416667	0	0.0795	0.15894	0.583333
v72	RR	SS	0	0	0	0	1
v72	RR	W-	0.75	0	0.0795	0.07947	0.25
v72	RR	XX	0.366667	0	0.0795	0.15894	0.633333
v72	RR	Y-	0.266667	0	0	0	0.733333
v72	RR	YR	0.366667	0	0	0	0.633333
v72	RW	_B	0.609091	0	0	0.1589	0.390909
v72	RW	_D	0.509091	0	0	0	0.490909
v72	RW	_G	0.454545	0	0	0	0.545455
v72	RW	_L	0.281818	0	0	0	0.718182
v72	RW	_O	0.290909	0	0	0	0.709091
v72	RW	_R	0.290909	0	0	0	0.709091
v72	RW	_S	0.436364	0	0	0	0.563636
v72	RW	_W	0.5	0	0	0	0.5
v72	RW	_X	0.445455	0	0	0	0.554545
v72	RW	B-	0.609091	0	0	0	0.390909
v72	RW	G-	0.136364	0	0	0	0.863636
v72	RW	GG	0.690909	0	0	0	0.309091
v72	RW	O-	0.372727	0	0	0.07947	0.627273
v72	RW	OO	0.372727	0	0	0	0.627273
v72	RW	PQ	0.290909	0	0.318	0.3179	0.709091
v72	RW	Q	0.0454545	0.0795	0	0	0.954545
v72	RW	RD	0.481818	0	0	0	0.518182
v72	RW	RG	0.172727	0	0	0	0.827273
v72	RW	RL	0.345455	0	0	0	0.654545
v72	RW	RO	0.345455	0	0.0795	0.31787	0.654545
v72	RW	RR	0.136364	0	0	0	0.863636
v72	RW	RW	1	0	0	0	0
v72	RW	RX	0.209091	0	0	0	0.790909
v72	RW	RY	0.509091	0	0	0	0.490909
v72	RW	S-	0.609091	0	0	0	0.390909
v72	RW	SS	0	0	0	0	1
v72	RW	W-	0.236364	0	0	0	0.763636
v72	RW	XX	0.545455	0	0	0	0.454545
v72	RW	Y-	0.209091	0	0	0	0.790909
v72	RW	YR	0.172727	0	0	0	0.827273
v72	RX	_B	0.770833	0	0	0	0.229167
v72	RX	_D	0.416667	0	0	0	0.583333
v72	RX	_G	0.1875	0	0	0	0.8125
v72	RX	_L	0.708333	0	0	0	0.291667
v72	RX	_O	0	0	0	0	1
v72	RX	_R	0.458333	0	0	0	0.541667
v72	RX	_S	0.208333	0	0	0	0.791667
v72	RX	_W	0.666667	0	0	0	0.333333
v72	RX	_X	0.0416667	0	0	0	0.958333
v72	RX	B-	0.0208333	0	0	0	0.979167
v72	RX	G-	0.208333	0	0	0	0.791667
v72	RX	GG	0.25	0	0	0	0.75
v72	RX	O-	0.645833	0	0	0	0.354167
v72	RX	OO	0.729167	0	0	0	0.270833
v72	RX	PQ	0	0	0	0	1
v72	RX	Q	0.1875	0	0	0	0.8125
v72	RX	RD	0.916667	0	0	0	0.0833333
v72	RX	RG	0.354167	0	0	0	0.645833
v72	RX	RL	0	0	0	0	1
v72	RX	RO	0.270833	0	0	0	0.729167
v72	RX	RR	0.416667	0	0	0	0.583333
v72	RX	RW	0.479167	0	0	0	0.520833
v72	RX	RX	1	0	0	0	0
v72	RX	RY	0.208333	0	0	0	0.791667
v72	RX	S-	0.5625	0	0	0	0.4375
v72	RX	SS	0.166667	0	0	0	0.833333
v72	RX	W-	0.145833	0	0	0	0.854167
v72	RX	XX	0.1875	0	0	0	0.8125
v72	RX	Y-	0.0416667	0	0	0	0.958333
v72	RX	YR	0.833333	0	0	0	0.166667
v72	RY	_B	0.416667	0	0	0.1589	0.583333
v72	RY	_D	0.515152	0	0	0	0.484848
v72	RY	_G	0.469697	0	0	0.07947	0.530303
v72	RY	_L	0.348485	0	0	0	0.651515
v72	RY	_O	0.363636	0	0	0.24	0.636364
v72	RY	_R	0.287879	0	0.0795	0.07947	0.712121
v72	RY	_S	0.477273	0	0	0.07947	0.522727
v72	RY	_W	0.219697	0	0	0	0.780303
v72	RY	_X	0.318182	0	0	0	0.681818
v72	RY	B-	0.492424	0	0	0	0.507576
v72	RY	G-	0.25	0	0	0	0.75
v72	RY	GG	0.606061	0	0	0	0.393939
v72	RY	O-	0.386364	0	0	0	0.613636
v72	RY	OO	0.287879	0	0	0	0.712121
v72	RY	PQ	0.242424	0	0.0795	0.07947	0.757576
v72	RY	Q	0.19697	0.0795	0	0	0.80303
v72	RY	RD	0.44697	0	0	0	0.55303
v72	RY	RG	0.159091	0	0	0	0.840909
v72	RY	RL	0.424242	0	0	0	0.575758
v72	RY	RO	0.477273	0	0	0	0.522727
v72	RY	RR	0.0833333	0	0	0	0.916667
v72	RY	RW	0.424242	0	0	0	0.575758
v72	RY	RX	0.0757576	0	0	0	0.924242
v72	RY	RY	1	0	0	0	0
v72	RY	S-	0.659091	0	0	0.07947	0.340909
v72	RY	SS	0.0606061	0	0	0	0.939394
v72	RY	W-	0.272727	0	0	0	0.727273
v72	RY	XX	0.469697	0	0	0	0.530303
v72	RY	Y-	0.0984848	0	0	0	0.901515
v72	RY	YR	0.287879	0	0	0	0.712121
v72	S-	_B	0.728	0	0.318	0.5563	0.272
v72	S-	_D	0.672	0	0	0	0.328
v72	S-	_G	0.512	0	0	0.07947	0.488
v72	S-	_L	0.432	0	0.0795	0.07947	0.568
v72	S-	_O	0.272	0	0	0	0.728
v72	S-	_R	0.456	0.0795	0.0795	0.23837	0.544
v72	S-	_S	0.544	0	0	0.07947	0.456
v72	S-	_W	0.232	0.0795	0	0	0.768
v72	S-	_X	0.456	0.0795	0	0	0.544
v72	S-	B-	0.464	0.0795	0.0795	0.23837	0.536
v72	S-	G-	0.248	0	0	0	0.752
v72	S-	GG	0.616	0	0	0.07947	0.384
v72	S-	O-	0.568	0	0	0.07947	0.432
v72	S-	OO	0.432	0.0795	0.0795	0.23837	0.568
v72	S-	PQ	0.328	0	0	0.07947	0.672
v72	S-	Q	0.208	0	0	0	0.792
v72	S-	RD	0.544	0	0.0795	0.07947	0.456
v72	S-	RG	0.28	0	0	0.07947	0.72
v72	S-	RL	0.256	0	0	0	0.744
v72	S-	RO	0.52	0	0	0.1589	0.48
v72	S-	RR	0.2	0	0.159	0.3178	0.8
v72	S-	RW	0.536	0	0.0795	0.07947	0.464
v72	S-	RX	0.216	0	0	0	0.784
v72	S-	RY	0.696	0	0.159	0.1589	0.304
v72	S-	S-	1	0	0	0	0
v72	S-	SS	0.04	0	0	0	0.96
v72	S-	W-	0.352	0	0.0795	0.07947	0.648
v72	S-	XX	0.512	0	0.0795	0.07947	0.488
v72	S-	Y-	0.176	0	0	0	0.824
v72	S-	YR	0.344	0	0	0	0.656
v72	SS	_B	0.1	0	0	0	0.9
v72	SS	_D	0.1	0	0	0	0.9
v72	SS	_G	0	0	0	0	1
v72	SS	_L	0.8	0	0	0	0.2
v72	SS	_O	0	0	0	0	1
v72	SS	_R	0.2	0	0	0	0.8
v72	SS	_S	1	0	0	0	0
v72	SS	_W	0	0	0	0	1
v72	SS	_X	0.1	0	0	0	0.9
v72	SS	B-	0	0	0	0	1
v72	SS	G-	1	0	0	0	0
v72	SS	GG	0.5	0	0	0	0.5
v72	SS	O-	0.7	0	0	0	0.3
v72	SS	OO	1	0	0	0	0
v72	SS	PQ	0	0	0	0	1
v72	SS	Q	0.5	0	0	0	0.5
v72	SS	RD	0.6	0	0	0	0.4
v72	SS	RG	1	0	0	0	0
v72	SS	RL	0	0	0	0	1
v72	SS	RO	0.9	0	0	0	0.1
v72	SS	RR	0	0	0	0	1
v72	SS	RW	0	0	0	0	1
v72	SS	RX	0.8	0	0	0	0.2
v72	SS	RY	0.8	0	0	0	0.2
v72	SS	S-	0.5	0	0	0	0.5
v72	SS	SS	1	0	0	0	0
v72	SS	W-	0	0	0	0	1
v72	SS	XX	0.9	0	0	0	0.1
v72	SS	Y-	0	0	0	0	1
v72	SS	YR	1	0	0	0	0
v72	W-	_B	0.595506	0	0.159	0.3178	0.404494
v72	W-	_D	0.685393	0	0	0	0.314607
v72	W-	_G	0.617978	0	0	0	0.382022
v72	W-	_L	0.685393	0	0.159	0.23837	0.314607
v72	W-	_O	0.191011	0	0	0	0.808989
v72	W-	_R	0.617978	0	0.0795	0.15894	0.382022
v72	W-	_S	0.404494	0.0795	0.0795	0.07947	0.595506
v72	W-	_W	0.123596	0	0	0	0.876404
v72	W-	_X	0.58427	0	0.0795	0.07947	0.41573
v72	W-	B-	0.426966	0	0	0	0.573034
v72	W-	G-	0.0224719	0	0	0	0.977528
v72	W-	GG	0.393258	0	0	0	0.606742
v72	W-	O-	0.651685	0	0	0	0.348315
v72	W-	OO	0.258427	0	0	0.07947	0.741573
v72	W-	PQ	0.550562	0.159	0.318	0.3179	0.449438
v72	W-	Q	0.606742	0	0	0	0.393258
v72	W-	RD	0.47191	0	0	0	0.52809
v72	W-	RG	0.325843	0	0	0	0.674157
v72	W-	RL	0.235955	0	0.0795	0.07947	0.764045
v72	W-	RO	0.719101	0.0795	0.159	0.23837	0.280899
v72	W-	RR	0.505618	0	0	0	0.494382
v72	W-	RW	0.292135	0	0	0	0.707865
v72	W-	RX	0.0786517	0	0	0	0.921348
v72	W-	RY	0.404494	0	0	0	0.595506
v72	W-	S-	0.494382	0	0.0795	0.07947	0.505618
v72	W-	SS	0	0	0	0	1
v72	W-	W-	1	0	0	0	0
v72	W-	XX	0.404494	0	0.0795	0.07947	0.595506
v72	W-	Y-	0.325843	0	0	0	0.674157
v72	W-	YR	0.213483	0	0	0	0.786517
v72	XX	_B	0.5	0	0.0795	0.15894	0.5
v72	XX	_D	0.460317	0	0	0	0.539683
v72	XX	_G	0.31746	0	0	0	0.68254
v72	XX	_L	0.452381	0	0	0.07947	0.547619
v72	XX	_O	0.18254	0	0	0	0.81746
v72	XX	_R	0.436508	0	0	0	0.563492
v72	XX	_S	0.746032	0	0	0	0.253968
v72	XX	_W	0.277778	0	0	0	0.722222
v72	XX	_X	0.52381	0	0.0795	0.07947	0.47619
v72	XX	B-	0.515873	0	0	0	0.484127
v72	XX	G-	0.309524	0	0	0	0.690476
v72	XX	GG	0.706349	0	0.119	0.1188	0.293651
v72	XX	O-	0.404762	0	0	0.07947	0.595238
v72	XX	OO	0.547619	0	0	0	0.452381
v72	XX	PQ	0.31746	0	0.0795	0.23837	0.68254
v72	XX	Q	0.380952	0	0	0	0.619048
v72	XX	RD	0.222222	0	0.0795	0.07947	0.777778
v72	XX	RG	0.404762	0	0	0	0.595238
v72	XX	RL	0.253968	0	0	0	0.746032
v72	XX	RO	0.666667	0	0	0	0.333333
v72	XX	RR	0.174603	0	0	0	0.825397
v72	XX	RW	0.47619	0	0	0	0.52381
v72	XX	RX	0.0714286	0	0	0	0.928571
v72	XX	RY	0.492063	0	0	0.07947	0.507937
v72	XX	S-	0.507937	0	0.0795	0.07947	0.492063
v72	XX	SS	0.0714286	0	0	0	0.928571
v72	XX	W-	0.285714	0	0	0	0.714286
v72	XX	XX	1	0	0	0	0
v72	XX	Y-	0.293651	0	0	0	0.706349
v72	XX	YR	0.301587	0	0	0	0.698413
v72	Y-	_B	0.392857	0	0	0	0.607143
v72	Y-	_D	0.678571	0	0	0	0.321429
v72	Y-	_G	0.5	0	0	0	0.5
v72	Y-	_L	0.589286	0	0	0	0.410714
v72	Y-	_O	0.0535714	0	0	0	0.946429
v72	Y-	_R	0.607143	0	0	0	0.392857
v72	Y-	_S	0.607143	0	0	0	0.392857
v72	Y-	_W	0.392857	0	0	0	0.607143
v72	Y-	_X	0.75	0	0	0	0.25
v72	Y-	B-	0.75	0	0	0	0.25
v72	Y-	G-	0.0714286	0	0	0	0.928571
v72	Y-	GG	0.571429	0	0	0	0.428571
v72	Y-	O-	0.607143	0	0	0	0.392857
v72	Y-	OO	0.321429	0	0	0	0.678571
v72	Y-	PQ	0.714286	0	0	0	0.285714
v72	Y-	Q	0.642857	0	0	0	0.357143
v72	Y-	RD	0.285714	0	0	0	0.714286
v72	Y-	RG	0.214286	0	0	0	0.785714
v72	Y-	RL	0.178571	0	0	0	0.821429
v72	Y-	RO	0.803571	0	0	0	0.196429
v72	Y-	RR	0.285714	0	0	0	0.714286
v72	Y-	RW	0.410714	0	0	0	0.589286
v72	Y-	RX	0.0357143	0	0	0	0.964286
v72	Y-	RY	0.232143	0	0	0	0.767857
v72	Y-	S-	0.392857	0	0	0	0.607143
v72	Y-	SS	0	0	0	0	1
v72	Y-	W-	0.517857	0	0	0	0.482143
v72	Y-	XX	0.660714	0	0	0	0.339286
v72	Y-	Y-	1	0	0	0	0
v72	Y-	YR	0.107143	0	0	0	0.892857
v72	YR	_B	0.563636	0	0.119	0.1188	0.436364
v72	YR	_D	0.354545	0	0	0	0.645455
v72	YR	_G	0.218182	0	0	0	0.781818
v72	YR	_L	0.609091	0	0	0	0.390909
v72	YR	_O	0	0	0	0	1
v72	YR	_R	0.390909	0	0	0.1188	0.609091
v72	YR	_S	0.390909	0	0	0	0.609091
v72	YR	_W	0.354545	0	0	0	0.645455
v72	YR	_X	0.136364	0	0.119	0.2376	0.863636
v72	YR	B-	0.0454545	0	0	0	0.954545
v72	YR	G-	0.209091	0	0	0	0.790909
v72	YR	GG	0.272727	0	0	0	0.727273
v72	YR	O-	0.4	0	0	0	0.6
v72	YR	OO	0.7	0	0	0	0.3
v72	YR	PQ	0.00909091	0	0	0	0.990909
v72	YR	Q	0.263636	0.24	0	0	0.736364
v72	YR	RD	0.454545	0	0	0	0.545455
v72	YR	RG	0.418182	0	0	0	0.581818
v72	YR	RL	0	0	0	0	1
v72	YR	RO	0.463636	0	0	0	0.536364
v72	YR	RR	0.2	0	0	0	0.8
v72	YR	RW	0.172727	0	0	0	0.827273
v72	YR	RX	0.363636	0	0	0	0.636364
v72	YR	RY	0.345455	0	0	0	0.654545
v72	YR	S-	0.390909	0	0	0	0.609091
v72	YR	SS	0.0909091	0	0	0	0.909091
v72	YR	W-	0.172727	0	0	0	0.827273
v72	YR	XX	0.345455	0	0	0	0.654545
v72	YR	Y-	0.0545455	0	0	0	0.945455
v72	YR	YR	1	0	0	0	0
v14	_B	_B	1	0	0	0	0
v14	_B	_D	0.773196	0.0795	0.159	0	0.226804
v14	_B	_O	0.587629	0	0.0795	0	0.412371
v14	_B	_W	0.773196	0.238	0.159	0	0.226804
v14	_B	_X	0.628866	0.159	0.238	0	0.371134
v14	_B	DD	0.381443	0	0.318	0	0.618557
v14	_B	G-	0.670103	0	0	0	0.329897
v14	_B	GG	0.402062	0	0	0	0.597938
v14	_B	L-	0.85567	0.0795	0.159	0	0.14433
v14	_B	LL	0.43299	0.159	0.159	0	0.56701
v14	_B	O-	0.783505	0	0.477	0	0.216495
v14	_B	OO	0.824742	0	0.159	0	0.175258
v14	_B	PQ	0.463918	0.0795	0.0795	0	0.536082
v14	_B	Q	0.298969	0	0	0	0.701031
v14	_B	RY	0.298969	0	0	0	0.701031
v14	_B	S-	0.659794	0	0.159	0	0.340206
v14	_B	SS	0.329897	0	0	0	0.670103
v14	_B	X-	0.546392	0	0.238	0	0.453608
v14	_B	XX	0.494845	0	0.318	0	0.505155
v14	_B	YY	0.371134	0	0	0	0.628866
v14	_D	_B	0.657895	0	0	0	0.342105
v14	_D	_D	1	0	0	0	0
v14	_D	_O	0.631579	0	0	0	0.368421
v14	_D	_W	0.754386	0	0	0	0.245614
v14	_D	_X	0.605263	0.636	0	0	0.394737
v14	_D	DD	0.298246	0	0	0	0.701754
v14	_D	G-	0.710526	0	0	0	0.289474
v14	_D	GG	0.421053	0	0	0	0.578947
v14	_D	L-	0.719298	0	0	0	0.280702
v14	_D	LL	0.605263	0	0	0	0.394737
v14	_D	O-	0.77193	0.0795	0	0	0.22807
v14	_D	OO	0.815789	0	0	0.0795	0.184211
v14	_D	PQ	0.622807	0	0	0	0.377193
v14	_D	Q	0.289474	0	0	0	0.710526
v14	_D	RY	0.307018	0	0	0	0.692982
v14	_D	S-	0.754386	0	0	0	0.245614
v14	_D	SS	0.368421	0	0	0	0.631579
v14	_D	X-	0.359649	0.0795	0	0	0.640351
v14	_D	XX	0.517544	0	0	0	0.482456
v14	_D	YY	0.368421	0	0	0	0.631579
v14	_O	_B	0.575758	0	0	0	0.424242
v14	_O	_D	0.727273	0	0	0	0.272727
v14	_O	_O	1	0	0	0	0
v14	_O	_W	0.727273	0	0.0795	0	0.272727
v14	_O	_X	0.505051	0	0.159	0	0.494949
v14	_O	DD	0.252525	0	0	0	0.747475
v14	_O	G-	0.414141	0	0	0	0.585859
v14	_O	GG	0.383838	0	0	0	0.616162
v14	_O	L-	0.717172	0	0.0795	0	0.282828
v14	_O	LL	0.535354	0.0795	0	0	0.464646
v14	_O	O-	0.848485	0.0795	0	0	0.151515
v14	_O	OO	0.69697	0	0.0795	0	0.30303
v14	_O	PQ	0.484848	0	0	0	0.515152
v14	_O	Q	0.262626	0	0	0	0.737374
v14	_O	RY	0.454545	0	0.471	0	0.545455
v14	_O	S-	0.585859	0	0.0795	0	0.414141
v14	_O	SS	0.575758	0	0.0795	0	0.424242
v14	_O	X-	0.555556	0.159	0.0795	0	0.444444
v14	_O	XX	0.707071	0	0	0	0.292929
v14	_O	YY	0.555556	0	0	0	0.444444
v14	_W	_B	0.581395	0.477	0	0	0.418605
v14	_W	_D	0.666667	0	0	0.0795	0.333333
v14	_W	_O	0.55814	0.318	0	0	0.44186
v14	_W	_W	1	0	0	0	0
v14	_W	_X	0.410853	0.159	0	0	0.589147
v14	_W	DD	0.496124	0	0	0	0.503876
v14	_W	G-	0.550388	0	0	0	0.449612
v14	_W	GG	0.457364	0	0	0	0.542636
v14	_W	L-	0.589147	0.238	0	0	0.410853
v14	_W	LL	0.44186	0	0	0	0.55814
v14	_W	O-	0.705426	0.0795	0	0	0.294574
v14	_W	OO	0.666667	0.0795	0	0	0.333333
v14	_W	PQ	0.713178	0	0	0	0.286822
v14	_W	Q	0.511628	0.0795	0	0	0.488372
v14	_W	RY	0.348837	0	0	0	0.651163
v14	_W	S-	0.604651	0	0	0	0.395349
v14	_W	SS	0.48062	0	0	0	0.51938
v14	_W	X-	0.511628	0	0	0.0795	0.488372
v14	_W	XX	0.620155	0.159	0	0	0.379845
v14	_W	YY	0.395349	0	0	0	0.604651
v14	_X	_B	0.60396	0.0795	0	0	0.39604
v14	_X	_D	0.683168	0	0	0	0.316832
v14	_X	_O	0.49505	0.238	0	0	0.50495
v14	_X	_W	0.524752	0	0	0	0.475248
v14	_X	_X	1	0	0	0	0
v14	_X	DD	0.0891089	0	0	0	0.910891
v14	_X	G-	0.613861	0.0795	0	0	0.386139
v14	_X	GG	0.178218	0	0	0	0.821782
v14	_X	L-	0.683168	0.0795	0	0	0.316832
v14	_X	LL	0.653465	0.0795	0	0	0.346535
v14	_X	O-	0.623762	1.19	0	0	0.376238
v14	_X	OO	0.742574	0.0795	0	0	0.257426
v14	_X	PQ	0.524752	0	0	0	0.475248
v14	_X	Q	0.19802	0.318	0	0	0.80198
v14	_X	RY	0.168317	0	0	0	0.831683
v14	_X	S-	0.673267	0.0795	0	0	0.326733
v14	_X	SS	0.168317	0	0	0	0.831683
v14	_X	X-	0.376238	0.0795	0	0	0.623762
v14	_X	XX	0.356436	0	0	0	0.643564
v14	_X	YY	0.227723	0	0	0	0.772277
v14	DD	_B	0.255172	0	0	0	0.744828
v14	DD	_D	0.234483	0.0795	0	0	0.765517
v14	DD	_O	0.172414	0	0	0	0.827586
v14	DD	_W	0.441379	0	0	0	0.558621
v14	DD	_X	0.062069	0	0	0	0.937931
v14	DD	DD	1	0	0	0	0
v14	DD	G-	0.289655	0	0	0	0.710345
v14	DD	GG	0.282759	0	0	0	0.717241
v14	DD	L-	0.296552	0	0	0	0.703448
v14	DD	LL	0.117241	0	0	0	0.882759
v14	DD	O-	0.310345	0	0	0	0.689655
v14	DD	OO	0.241379	0	0	0	0.758621
v14	DD	PQ	0.724138	0	0	0	0.275862
v14	DD	Q	0.6	0	0	0	0.4
v14	DD	RY	0.158621	0	0	0	0.841379
v14	DD	S-	0.255172	0	0	0	0.744828
v14	DD	SS	0.324138	0	0	0	0.675862
v14	DD	X-	0.482759	0	0	0	0.517241
v14	DD	XX	0.227586	0	0	0	0.772414
v14	DD	YY	0.524138	0	0	0	0.475862
v14	G-	_B	0.607477	0	0	0	0.392523
v14	G-	_D	0.757009	0	0	0	0.242991
v14	G-	_O	0.383178	0	0	0	0.616822
v14	G-	_W	0.663551	0	0	0	0.336449
v14	G-	_X	0.579439	0	0	0	0.420561
v14	G-	DD	0.392523	0	0	0	0.607477
v14	G-	G-	1	0	0	0	0
v14	G-	GG	0.280374	0	0	0	0.719626
v14	G-	L-	0.607477	0	0	0	0.392523
v14	G-	LL	0.504673	0	0	0	0.495327
v14	G-	O-	0.551402	0	0	0	0.448598
v14	G-	OO	0.738318	0	0	0	0.261682
v14	G-	PQ	0.71028	0	0	0	0.28972
v14	G-	Q	0.364486	0	0	0	0.635514
v14	G-	RY	0.158879	0	0	0	0.841121
v14	G-	S-	0.813084	0	0	0	0.186916
v14	G-	SS	0.158879	0	0	0	0.841121
v14	G-	X-	0.224299	0	0	0	0.775701
v14	G-	XX	0.299065	0	0	0	0.700935
v14	G-	YY	0.205607	0	0	0	0.794393
v14	GG	_B	0.619048	0	0	0	0.380952
v14	GG	_D	0.761905	0	0	0	0.238095
v14	GG	_O	0.603175	0	0	0	0.396825
v14	GG	_W	0.936508	0	0	0	0.0634921
v14	GG	_X	0.285714	0	0	0	0.714286
v14	GG	DD	0.650794	0	0	0	0.349206
v14	GG	G-	0.47619	0	0	0	0.52381
v14	GG	GG	1	0	0	0	0
v14	GG	L-	0.555556	0	0	0	0.444444
v14	GG	LL	0.47619	0	0	0	0.52381
v14	GG	O-	0.825397	0	0	0	0.174603
v14	GG	OO	0.666667	0	0	0	0.333333
v14	GG	PQ	0.84127	0	0	0	0.15873
v14	GG	Q	0.666667	0	0	0	0.333333
v14	GG	RY	0.571429	0	0	0	0.428571
v14	GG	S-	0.555556	0	0	0	0.444444
v14	GG	SS	0.619048	0	0	0.0795	0.380952
v14	GG	X-	0.460317	0	0	0	0.539683
v14	GG	XX	0.634921	0	0	0	0.365079
v14	GG	YY	0.587302	0	0	0	0.412698
v14	L-	_B	0.664	0.318	0.397	0.0795	0.336
v14	L-	_D	0.656	0	0.0795	0	0.344
v14	L-	_O	0.568	0	0.159	0	0.432
v14	L-	_W	0.608	0	0.0795	0	0.392
v14	L-	_X	0.552	0	0.0795	0	0.448
v14	L-	DD	0.344	0.159	0.556	0	0.656
v14	L-	G-	0.52	0	0	0	0.48
v14	L-	GG	0.28	0	0.0795	0	0.72
v14	L-	L-	1	0	0	0	0
v14	L-	LL	0.44	0	0.238	0	0.56
v14	L-	O-	0.768	0.0795	0.318	0	0.232
v14	L-	OO	0.648	0	0.397	0	0.352
v14	L-	PQ	0.488	0	0.0795	0	0.512
v14	L-	Q	0.32	0	0	0	0.68
v14	L-	RY	0.216	0	0.471	0	0.784
v14	L-	S-	0.552	0	0.238	0	0.448
v14	L-	SS	0.32	0	0.0795	0	0.68
v14	L-	X-	0.496	0	0.318	0	0.504
v14	L-	XX	0.464	0	0.0795	0	0.536
v14	L-	YY	0.36	0	0	0	0.64
v14	LL	_B	0.4375	0	0	0	0.5625
v14	LL	_D	0.71875	0	0.0795	0	0.28125
v14	LL	_O	0.552083	0	0	0	0.447917
v14	LL	_W	0.59375	0	0.238	0	0.40625
v14	LL	_X	0.6875	0.238	0.397	0	0.3125
v14	LL	DD	0.177083	0	0	0	0.822917
v14	LL	G-	0.5625	0	0.0795	0	0.4375
v14	LL	GG	0.3125	0	0.0795	0	0.6875
v14	LL	L-	0.572917	0	0.0795	0	0.427083
v14	LL	LL	1	0	0	0	0
v14	LL	O-	0.677083	0	0.0795	0	0.322917
v14	LL	OO	0.729167	0	0.318	0	0.270833
v14	LL	PQ	0.760417	0	0	0	0.239583
v14	LL	Q	0.364583	0	0	0	0.635417
v14	LL	RY	0.291667	0	0	0	0.708333
v14	LL	S-	0.677083	0	0.159	0	0.322917
v14	LL	SS	0.375	0	0	0	0.625
v14	LL	X-	0.229167	0	0.397	0	0.770833
v14	LL	XX	0.4375	0	0.159	0	0.5625
v14	LL	YY	0.3125	0	0	0	0.6875
v14	O-	_B	0.603175	0.159	0.318	0	0.396825
v14	O-	_D	0.698413	0	0.0795	0	0.301587
v14	O-	_O	0.666667	0.0795	0.0795	0	0.333333
v14	O-	_W	0.722222	0.159	0.477	0	0.277778
v14	O-	_X	0.5	0	0.397	0	0.5
v14	O-	DD	0.357143	0	0.318	0	0.642857
v14	O-	G-	0.468254	0	0.238	0	0.531746
v14	O-	GG	0.412698	0	0.238	0	0.587302
v14	O-	L-	0.761905	0.0795	0.715	0	0.238095
v14	O-	LL	0.515873	0	0.238	0	0.484127
v14	O-	O-	1	0	0	0	0
v14	O-	OO	0.68254	0.0795	0.556	0	0.31746
v14	O-	PQ	0.595238	0	0	0	0.404762
v14	O-	Q	0.412698	0	0	0	0.587302
v14	O-	RY	0.373016	0	0	0	0.626984
v14	O-	S-	0.539683	0	0	0	0.460317
v14	O-	SS	0.531746	0	0.238	0	0.468254
v14	O-	X-	0.563492	0	0.159	0.0795	0.436508
v14	O-	XX	0.65873	0	0.477	0	0.34127
v14	O-	YY	0.484127	0	0	0	0.515873
v14	OO	_B	0.672269	0.318	0.318	0	0.327731
v14	OO	_D	0.781513	0.0795	0.397	0	0.218487
v14	OO	_O	0.579832	0.397	0.477	0	0.420168
v14	OO	_W	0.722689	0.318	0.159	0	0.277311
v14	OO	_X	0.630252	0	0.556	0.0795	0.369748
v14	OO	DD	0.294118	1.67	1.11	0	0.705882
v14	OO	G-	0.663866	0.713	0	0	0.336134
v14	OO	GG	0.352941	0.0795	0.0795	0	0.647059
v14	OO	L-	0.680672	0.0795	0.159	0	0.319328
v14	OO	LL	0.588235	0.318	0.238	0	0.411765
v14	OO	O-	0.722689	0	0.318	0	0.277311
v14	OO	OO	1	0	0	0	0
v14	OO	PQ	0.621849	0	0	0	0.378151
v14	OO	Q	0.327731	0.0795	0	0	0.672269
v14	OO	RY	0.294118	0	0.235	0	0.705882
v14	OO	S-	0.739496	0.0795	0.159	0	0.260504
v14	OO	SS	0.344538	0	0.0795	0	0.655462
v14	OO	X-	0.369748	0.159	0.556	0	0.630252
v14	OO	XX	0.487395	0.159	0.238	0	0.512605
v14	OO	YY	0.327731	0	0	0	0.672269
v14	PQ	_B	0.198238	0	0	0	0.801762
v14	PQ	_D	0.312775	0	0	0	0.687225
v14	PQ	_O	0.211454	0	0	0	0.788546
v14	PQ	_W	0.405286	0	0	0	0.594714
v14	PQ	_X	0.23348	0	0	0	0.76652
v14	PQ	DD	0.462555	0	0	0	0.537445
v14	PQ	G-	0.334802	0	0	0	0.665198
v14	PQ	GG	0.23348	0	0	0	0.76652
v14	PQ	L-	0.268722	0	0	0	0.731278
v14	PQ	LL	0.321586	0	0	0	0.678414
v14	PQ	O-	0.330396	0	0	0	0.669604
v14	PQ	OO	0.325991	0	0	0	0.674009
v14	PQ	PQ	1	0	0	0	0
v14	PQ	Q	0.612335	0	0	0	0.387665
v14	PQ	RY	0.132159	0	0	0	0.867841
v14	PQ	S-	0.339207	0	0	0	0.660793
v14	PQ	SS	0.242291	0	0	0	0.757709
v14	PQ	X-	0.264317	0	0	0	0.735683
v14	PQ	XX	0.22467	0	0	0	0.77533
v14	PQ	YY	0.299559	0	0	0	0.700441
v14	Q	_B	0.2	0	0	0	0.8
v14	Q	_D	0.227586	0.0795	0	0	0.772414
v14	Q	_O	0.17931	0	0	0	0.82069
v14	Q	_W	0.455172	0	0	0	0.544828
v14	Q	_X	0.137931	0.397	0	0	0.862069
v14	Q	DD	0.6	0	0	0	0.4
v14	Q	G-	0.268966	0	0	0	0.731034
v14	Q	GG	0.289655	0	0	0	0.710345
v14	Q	L-	0.275862	0	0	0	0.724138
v14	Q	LL	0.241379	0	0	0	0.758621
v14	Q	O-	0.358621	0.318	0	0	0.641379
v14	Q	OO	0.268966	0	0	0	0.731034
v14	Q	PQ	0.958621	0	0	0	0.0413793
v14	Q	Q	1	0	0	0	0
v14	Q	RY	0.158621	0	0	0	0.841379
v14	Q	S-	0.193103	0.477	0	0	0.806897
v14	Q	SS	0.296552	0	0	0	0.703448
v14	Q	X-	0.358621	0.397	0	0	0.641379
v14	Q	XX	0.282759	0	0	0	0.717241
v14	Q	YY	0.324138	0	0	0	0.675862
v14	RY	_B	0.54717	0	0	0	0.45283
v14	RY	_D	0.660377	0	0	0	0.339623
v14	RY	_O	0.849057	0	0	0	0.150943
v14	RY	_W	0.849057	0	0	0	0.150943
v14	RY	_X	0.320755	0	0	0	0.679245
v14	RY	DD	0.433962	0	0	0	0.566038
v14	RY	G-	0.320755	0	0	0	0.679245
v14	RY	GG	0.679245	0	0	0	0.320755
v14	RY	L-	0.509434	0	0	0	0.490566
v14	RY	LL	0.528302	0	0	0	0.471698
v14	RY	O-	0.886792	0	0	0	0.113208
v14	RY	OO	0.660377	0	0	0	0.339623
v14	RY	PQ	0.566038	0	0	0	0.433962
v14	RY	Q	0.433962	0	0	0	0.566038
v14	RY	RY	1	0	0	0	0
v14	RY	S-	0.45283	0	0	0	0.54717
v14	RY	SS	0.90566	0	0	0.0795	0.0943396
v14	RY	X-	0.679245	0	0	0	0.320755
v14	RY	XX	0.886792	0	0	0	0.113208
v14	RY	YY	0.792453	0	0	0	0.207547
v14	S-	_B	0.571429	0.397	0.0795	0.0795	0.428571
v14	S-	_D	0.767857	0	0.0795	0	0.232143
v14	S-	_O	0.517857	0.0795	0.0795	0	0.482143
v14	S-	_W	0.696429	0.0795	0.238	0	0.303571
v14	S-	_X	0.607143	0.0795	0.0795	0	0.392857
v14	S-	DD	0.330357	0.0795	0.238	0	0.669643
v14	S-	G-	0.776786	0.238	0.238	0	0.223214
v14	S-	GG	0.3125	0	0	0	0.6875
v14	S-	L-	0.616071	0.318	0.397	0	0.383929
v14	S-	LL	0.580357	0.0795	0.238	0	0.419643
v14	S-	O-	0.607143	0.715	0.238	0	0.392857
v14	S-	OO	0.785714	0	0.238	0	0.214286
v14	S-	PQ	0.6875	0	0	0	0.3125
v14	S-	Q	0.25	0	0	0	0.75
v14	S-	RY	0.214286	0	0.235	0	0.785714
v14	S-	S-	1	0	0	0	0
v14	S-	SS	0.25	0	0.0795	0	0.75
v14	S-	X-	0.276786	0	0.0795	0	0.723214
v14	S-	XX	0.419643	0	0.159	0	0.580357
v14	S-	YY	0.267857	0.12	0	0	0.732143
v14	SS	_B	0.390244	0	0	0	0.609756
v14	SS	_D	0.512195	0	0	0	0.487805
v14	SS	_O	0.695122	0	0	0	0.304878
v14	SS	_W	0.756098	0	0	0.0795	0.243902
v14	SS	_X	0.207317	0	0	0	0.792683
v14	SS	DD	0.573171	0	0	0	0.426829
v14	SS	G-	0.207317	0	0	0	0.792683
v14	SS	GG	0.47561	0	0	0.0795	0.52439
v14	SS	L-	0.487805	0	0	0	0.512195
v14	SS	LL	0.439024	0	0	0	0.560976
v14	SS	O-	0.817073	0	0	0	0.182927
v14	SS	OO	0.5	0	0	0	0.5
v14	SS	PQ	0.670732	0	0	0	0.329268
v14	SS	Q	0.52439	0.0795	0	0	0.47561
v14	SS	RY	0.585366	0	0	0	0.414634
v14	SS	S-	0.341463	0	0	0	0.658537
v14	SS	SS	1	0	0	0	0
v14	SS	X-	0.695122	0	0	0	0.304878
v14	SS	XX	0.804878	0	0	0	0.195122
v14	SS	YY	0.719512	0	0	0	0.280488
v14	X-	_B	0.46087	0	0	0	0.53913
v14	X-	_D	0.356522	0.636	0	0	0.643478
v14	X-	_O	0.478261	0	0	0	0.521739
v14	X-	_W	0.573913	0	0	0	0.426087
v14	X-	_X	0.330435	1.91	0	0	0.669565
v14	X-	DD	0.608696	0.159	0	0	0.391304
v14	X-	G-	0.208696	0.356	0	0	0.791304
v14	X-	GG	0.252174	0	0	0	0.747826
v14	X-	L-	0.53913	0.238	0	0	0.46087
v14	X-	LL	0.191304	0.159	0	0	0.808696
v14	X-	O-	0.617391	1.11	0	0	0.382609
v14	X-	OO	0.382609	0.0795	0	0	0.617391
v14	X-	PQ	0.521739	0	0	0	0.478261
v14	X-	Q	0.452174	0.0795	0	0	0.547826
v14	X-	RY	0.313043	0	0	0	0.686957
v14	X-	S-	0.269565	1.11	0	0	0.730435
v14	X-	SS	0.495652	0	0	0	0.504348
v14	X-	X-	1	0	0	0	0
v14	X-	XX	0.53913	0	0	0	0.46087
v14	X-	YY	0.713043	0	0	0	0.286957
v14	XX	_B	0.539326	0	0	0	0.460674
v14	XX	_D	0.662921	0	0	0	0.337079
v14	XX	_O	0.786517	0	0	0	0.213483
v14	XX	_W	0.898876	0.0795	0	0	0.101124
v14	XX	_X	0.404494	0	0	0	0.595506
v14	XX	DD	0.370787	0	0	0	0.629213
v14	XX	G-	0.359551	0	0	0	0.640449
v14	XX	GG	0.449438	0	0	0	0.550562
v14	XX	L-	0.651685	0.159	0	0	0.348315
v14	XX	LL	0.47191	0	0	0	0.52809
v14	XX	O-	0.932584	0.0795	0	0	0.0674157
v14	XX	OO	0.651685	0	0	0	0.348315
v14	XX	PQ	0.573034	0	0	0	0.426966
v14	XX	Q	0.460674	0.0795	0	0	0.539326
v14	XX	RY	0.52809	0	0	0	0.47191
v14	XX	S-	0.52809	0	0	0	0.47191
v14	XX	SS	0.741573	0.0795	0	0	0.258427
v14	XX	X-	0.696629	0	0	0.0795	0.303371
v14	XX	XX	1	0	0	0	0
v14	XX	YY	0.573034	0	0	0	0.426966
v14	YY	_B	0.270677	0	0	0	0.729323
v14	YY	_D	0.315789	0	0	0	0.684211
v14	YY	_O	0.413534	0	0	0	0.586466
v14	YY	_W	0.383459	0	0	0	0.616541
v14	YY	_X	0.172932	0	0	0	0.827068
v14	YY	DD	0.571429	0	0	0	0.428571
v14	YY	G-	0.165414	0	0	0	0.834586
v14	YY	GG	0.278195	0	0	0	0.721805
v14	YY	L-	0.338346	0	0	0	0.661654
v14	YY	LL	0.225564	0	0	0	0.774436
v14	YY	O-	0.458647	0	0	0	0.541353
v14	YY	OO	0.293233	0	0	0	0.706767
v14	YY	PQ	0.511278	0	0	0	0.488722
v14	YY	Q	0.353383	0.12	0	0	0.646617
v14	YY	RY	0.315789	0	0	0	0.684211
v14	YY	S-	0.225564	0	0	0	0.774436
v14	YY	SS	0.443609	0	0	0	0.556391
v14	YY	X-	0.616541	0	0.24	0	0.383459
v14	YY	XX	0.383459	0	0	0	0.616541
v14	YY	YY	1	0	0	0	0
v57	_B	_B	1	0	0	0	0
v57	_B	_D	0.422535	0	0	0	0.577465
v57	_B	_G	0.464789	0.119	0	0	0.535211
v57	_B	_O	0.380282	0	0	0	0.619718
v57	_B	_W	0.352113	0	0	0	0.647887
v57	_B	_X	0.760563	0	0	0	0.239437
v57	_B	_Y	0.760563	0.119	0.119	0	0.239437
v57	_B	BB	0.774648	0	0	0	0.225352
v57	_B	G-	0.507042	0	0.119	0	0.492958
v57	_B	GG	0.704225	0	0	0	0.295775
v57	_B	L-	0.619718	0	0.119	0	0.380282
v57	_B	O-	0.577465	0	0	0	0.422535
v57	_B	OO	0.380282	0	0	0	0.619718
v57	_B	PQ	0.338028	0	0	0	0.661972
v57	_B	Q	0.704225	0	0	0	0.295775
v57	_B	R-	0.633803	0	0	0	0.366197
v57	_B	W-	0.323944	0	0	0	0.676056
v57	_B	WW	0.661972	0	0	0	0.338028
v57	_B	X-	0.84507	0	0.119	0	0.15493
v57	_B	XX	0.492958	0	0	0	0.507042
v57	_B	Y-	0.056338	0	0.119	0	0.943662
v57	_D	_B	0.283019	0	0	0	0.716981
v57	_D	_D	1	0	0	0	0
v57	_D	_G	0.613208	0	0	0	0.386792
v57	_D	_O	0.754717	0	0	0	0.245283
v57	_D	_W	0.367925	0	0	0	0.632075
v57	_D	_X	0.330189	0	0	0	0.669811
v57	_D	_Y	0.490566	0.119	0.24	0	0.509434
v57	_D	BB	0.622642	0	0.24	0	0.377358
v57	_D	G-	0.45283	0.119	0.24	0	0.54717
v57	_D	GG	0.471698	0	0.24	0	0.528302
v57	_D	L-	0.867925	0	0	0	0.132075
v57	_D	O-	0.5	0	0.238	0	0.5
v57	_D	OO	0.669811	0.119	0	0	0.330189
v57	_D	PQ	0.669811	0	0	0	0.330189
v57	_D	Q	0.320755	0	0	0	0.679245
v57	_D	R-	0.613208	0	0	0	0.386792
v57	_D	W-	0.839623	0	0.119	0	0.160377
v57	_D	WW	0.481132	0	0	0	0.518868
v57	_D	X-	0.54717	0	0	0	0.45283
v57	_D	XX	0.45283	0	0	0	0.54717
v57	_D	Y-	0.198113	0	0	0	0.801887
v57	_G	_B	0.320388	0	0.119	0	0.679612
v57	_G	_D	0.631068	0.478	0.478	0.119	0.368932
v57	_G	_G	1	0	0	0	0
v57	_G	_O	0.495146	0	0	0	0.504854
v57	_G	_W	0.563107	0.119	0	0	0.436893
v57	_G	_X	0.504854	0.119	0.478	0	0.495146
v57	_G	_Y	0.349515	1.07	0.119	0	0.650485
v57	_G	BB	0.747573	0.119	0.119	0	0.252427
v57	_G	G-	0.669903	0.475	0.48	0	0.330097
v57	_G	GG	0.621359	0	0	0	0.378641
v57	_G	L-	0.825243	0.238	0	0	0.174757
v57	_G	O-	0.359223	0	0.24	0	0.640777
v57	_G	OO	0.533981	0	0	0	0.466019
v57	_G	PQ	0.747573	0.119	0	0	0.252427
v57	_G	Q	0.300971	1.78	0	0.119	0.699029
v57	_G	R-	0.368932	0	0	0	0.631068
v57	_G	W-	0.660194	0	0.119	0	0.339806
v57	_G	WW	0.757282	0.119	0.24	0	0.242718
v57	_G	X-	0.582524	0	0.24	0	0.417476
v57	_G	XX	0.23301	0.594	0.238	0.119	0.76699
v57	_G	Y-	0.330097	0.119	0	0	0.669903
v57	_O	_B	0.177632	0	0	0	0.822368
v57	_O	_D	0.526316	0	0	0	0.473684
v57	_O	_G	0.335526	0	0	0	0.664474
v57	_O	_O	1	0	0	0	0
v57	_O	_W	0.217105	0	0	0	0.782895
v57	_O	_X	0.309211	0	0	0	0.690789
v57	_O	_Y	0.513158	0	0	0	0.486842
v57	_O	BB	0.480263	0	0	0	0.519737
v57	_O	G-	0.256579	0	0	0	0.743421
v57	_O	GG	0.657895	0	0	0	0.342105
v57	_O	L-	0.519737	0	0	0	0.480263
v57	_O	O-	0.5	0	0	0	0.5
v57	_O	OO	0.460526	0	0	0	0.539474
v57	_O	PQ	0.394737	0	0	0	0.605263
v57	_O	Q	0.263158	0.119	0	0	0.736842
v57	_O	R-	0.552632	0	0	0	0.447368
v57	_O	W-	0.526316	0	0	0	0.473684
v57	_O	WW	0.269737	0	0.119	0	0.730263
v57	_O	X-	0.421053	0	0.24	0	0.578947
v57	_O	XX	0.565789	0	0	0	0.434211
v57	_O	Y-	0.296053	0	0	0	0.703947
v57	_W	_B	0.268817	0	0.119	0	0.731183
v57	_W	_D	0.419355	0	0	0	0.580645
v57	_W	_G	0.623656	0	0	0	0.376344
v57	_W	_O	0.354839	0	0	0	0.645161
v57	_W	_W	1	0	0	0	0
v57	_W	_X	0.462366	0	0.24	0	0.537634
v57	_W	_Y	0.11828	0.119	0	0	0.88172
v57	_W	BB	0.688172	0	0	0	0.311828
v57	_W	G-	0.688172	0	0	0	0.311828
v57	_W	GG	0.44086	0	0	0	0.55914
v57	_W	L-	0.591398	0	0	0	0.408602
v57	_W	O-	0.150538	0	0.359	0	0.849462
v57	_W	OO	0.451613	0	0	0	0.548387
v57	_W	PQ	0.623656	0.119	0	0	0.376344
v57	_W	Q	0.172043	0	0	0	0.827957
v57	_W	R-	0.301075	0	0	0	0.698925
v57	_W	W-	0.580645	0.238	0	0	0.419355
v57	_W	WW	0.849462	0	0	0	0.150538
v57	_W	X-	0.408602	0	0	0	0.591398
v57	_W	XX	0	0	0	0	1
v57	_W	Y-	0.344086	0	0	0	0.655914
v57	_X	_B	0.586957	0	0	0	0.413043
v57	_X	_D	0.380435	0	0.119	0.119	0.619565
v57	_X	_G	0.565217	0	0	0	0.434783
v57	_X	_O	0.51087	0.24	0	0	0.48913
v57	_X	_W	0.467391	0.596	1.08	0.24	0.532609
v57	_X	_X	1	0	0	0	0
v57	_X	_Y	0.641304	0.359	0.119	0	0.358696
v57	_X	BB	0.891304	0.24	1.56	0	0.108696
v57	_X	G-	0.554348	0.119	0	0.24	0.445652
v57	_X	GG	0.728261	0	0	0	0.271739
v57	_X	L-	0.586957	0.356	0.238	0	0.413043
v57	_X	O-	0.543478	1.79	1.32	0.119	0.456522
v57	_X	OO	0.423913	0.359	0.836	0.24	0.576087
v57	_X	PQ	0.413043	0.119	0	0.24	0.586957
v57	_X	Q	0.456522	0.836	0	0	0.543478
v57	_X	R-	0.521739	0	0	0	0.478261
v57	_X	W-	0.326087	0.119	0	0	0.673913
v57	_X	WW	0.684783	0.119	0	0	0.315217
v57	_X	X-	0.706522	0	0.119	0	0.293478
v57	_X	XX	0.402174	0	0	0	0.597826
v57	_X	Y-	0.173913	0	0.119	0	0.826087
v57	_Y	_B	0.409091	0	0	0	0.590909
v57	_Y	_D	0.393939	0	0	0	0.606061
v57	_Y	_G	0.272727	0	0	0	0.727273
v57	_Y	_O	0.590909	0	0	0	0.409091
v57	_Y	_W	0.0833333	0	0	0	0.916667
v57	_Y	_X	0.44697	0.119	0	0	0.55303
v57	_Y	_Y	1	0	0	0	0
v57	_Y	BB	0.492424	0	0.119	0	0.507576
v57	_Y	G-	0.265152	0	0	0	0.734848
v57	_Y	GG	0.659091	0	0	0	0.340909
v57	_Y	L-	0.431818	0	0	0	0.568182
v57	_Y	O-	0.765152	0	0.119	0	0.234848
v57	_Y	OO	0.25	0	0	0	0.75
v57	_Y	PQ	0.234848	0	0	0	0.765152
v57	_Y	Q	0.613636	0	0	0	0.386364
v57	_Y	R-	0.689394	0	0	0	0.310606
v57	_Y	W-	0.356061	0	0	0	0.643939
v57	_Y	WW	0.280303	0.119	0	0	0.719697
v57	_Y	X-	0.613636	0	0	0.119	0.386364
v57	_Y	XX	0.787879	0.238	0	0.119	0.212121
v57	_Y	Y-	0.431818	0	0	0	0.568182
v57	BB	_B	0.433071	0	0	0	0.566929
v57	BB	_D	0.519685	0	0	0	0.480315
v57	BB	_G	0.606299	0	0.596	0	0.393701
v57	BB	_O	0.574803	0	0	0	0.425197
v57	BB	_W	0.503937	0	0	0	0.496063
v57	BB	_X	0.645669	0	0	0	0.354331
v57	BB	_Y	0.511811	0	0	0	0.488189
v57	BB	BB	1	0	0	0	0
v57	BB	G-	0.488189	0	0	0	0.511811
v57	BB	GG	0.692913	0	0	0	0.307087
v57	BB	L-	0.685039	0	0	0	0.314961
v57	BB	O-	0.472441	0	0	0	0.527559
v57	BB	OO	0.472441	0	0	0	0.527559
v57	BB	PQ	0.535433	0	0.119	0	0.464567
v57	BB	Q	0.338583	0.359	0.24	0	0.661417
v57	BB	R-	0.566929	0	0	0	0.433071
v57	BB	W-	0.519685	0	0.119	0	0.480315
v57	BB	WW	0.614173	0	0.24	0	0.385827
v57	BB	X-	0.622047	0	0.48	0	0.377953
v57	BB	XX	0.370079	0	0	0	0.629921
v57	BB	Y-	0.244094	0	0.119	0	0.755906
v57	G-	_B	0.321429	0	0	0	0.678571
v57	G-	_D	0.428571	0	0	0	0.571429
v57	G-	_G	0.616071	0.119	0.24	0	0.383929
v57	G-	_O	0.348214	0	0	0	0.651786
v57	G-	_W	0.571429	0	0.24	0	0.428571
v57	G-	_X	0.455357	0.119	0.24	0	0.544643
v57	G-	_Y	0.3125	0.119	0	0	0.6875
v57	G-	BB	0.553571	0	0	0	0.446429
v57	G-	G-	1	0	0	0	0
v57	G-	GG	0.553571	0	0	0	0.446429
v57	G-	L-	0.598214	0	0	0	0.401786
v57	G-	O-	0.294643	0.24	0.24	0	0.705357
v57	G-	OO	0.276786	0	0	0	0.723214
v57	G-	PQ	0.633929	0	0	0	0.366071
v57	G-	Q	0.339286	0	0	0	0.660714
v57	G-	R-	0.321429	0	0.119	0	0.678571
v57	G-	W-	0.607143	0	0	0	0.392857
v57	G-	WW	0.75	0.119	0.24	0	0.25
v57	G-	X-	0.428571	0	0.48	0	0.571429
v57	G-	XX	0.223214	0.24	0.119	0	0.776786
v57	G-	Y-	0.473214	0	0.24	0	0.526786
v57	GG	_B	0.257732	0.119	0	0	0.742268
v57	GG	_D	0.257732	0	0	0.119	0.742268
v57	GG	_G	0.329897	0	0	0	0.670103
v57	GG	_O	0.515464	0	0.119	0	0.484536
v57	GG	_W	0.21134	0	0	0	0.78866
v57	GG	_X	0.345361	0.119	0.356	0	0.654639
v57	GG	_Y	0.448454	0	0	0	0.551546
v57	GG	BB	0.453608	0	0	0	0.546392
v57	GG	G-	0.319588	0	0	0	0.680412
v57	GG	GG	1	0	0	0	0
v57	GG	L-	0.386598	0	0	0	0.613402
v57	GG	O-	0.520619	0.119	0.24	0	0.479381
v57	GG	OO	0.247423	0	0.24	0	0.752577
v57	GG	PQ	0.304124	0	0	0	0.695876
v57	GG	Q	0.309278	0	0	0	0.690722
v57	GG	R-	0.505155	0	0	0	0.494845
v57	GG	W-	0.268041	0	0	0	0.731959
v57	GG	WW	0.35567	0	0	0	0.64433
v57	GG	X-	0.376289	0	0	0	0.623711
v57	GG	XX	0.530928	0.119	0	0	0.469072
v57	GG	Y-	0.474227	0	0.119	0	0.525773
v57	L-	_B	0.349206	0	0	0	0.650794
v57	L-	_D	0.730159	0	0	0	0.269841
v57	L-	_G	0.674603	0	0	0	0.325397
v57	L-	_O	0.626984	0	0	0	0.373016
v57	L-	_W	0.436508	0	0	0	0.563492
v57	L-	_X	0.428571	0	0	0	0.571429
v57	L-	_Y	0.452381	0	0	0	0.547619
v57	L-	BB	0.690476	0.119	0	0	0.309524
v57	L-	G-	0.531746	0	0	0	0.468254
v57	L-	GG	0.595238	0	0	0	0.404762
v57	L-	L-	1	0	0	0	0
v57	L-	O-	0.388889	0.119	0	0	0.611111
v57	L-	OO	0.619048	0	0	0	0.380952
v57	L-	PQ	0.674603	0	0.119	0	0.325397
v57	L-	Q	0.333333	0	0	0.119	0.666667
v57	L-	R-	0.5	0	0.119	0	0.5
v57	L-	W-	0.722222	0	0	0	0.277778
v57	L-	WW	0.626984	0	0	0	0.373016
v57	L-	X-	0.555556	0	0	0	0.444444
v57	L-	XX	0.365079	0	0	0	0.634921
v57	L-	Y-	0.190476	0	0	0	0.809524
v57	O-	_B	0.310606	0	0	0	0.689394
v57	O-	_D	0.401515	0	0	0	0.598485
v57	O-	_G	0.280303	0	0.119	0	0.719697
v57	O-	_O	0.575758	0	0	0	0.424242
v57	O-	_W	0.106061	0	0	0	0.893939
v57	O-	_X	0.378788	0	0.24	0	0.621212
v57	O-	_Y	0.765152	0	0	0	0.234848
v57	O-	BB	0.454545	0	0.24	0	0.545455
v57	O-	G-	0.25	0	0	0	0.75
v57	O-	GG	0.765152	0	0	0	0.234848
v57	O-	L-	0.371212	0	0	0	0.628788
v57	O-	O-	1	0	0	0	0
v57	O-	OO	0.287879	0	0.24	0	0.712121
v57	O-	PQ	0.30303	0.119	0.24	0	0.69697
v57	O-	Q	0.484848	1.08	0	0	0.515152
v57	O-	R-	0.772727	0	0	0	0.227273
v57	O-	W-	0.371212	0	0.72	0	0.628788
v57	O-	WW	0.257576	0.119	0.119	0	0.742424
v57	O-	X-	0.568182	0	0.119	0.119	0.431818
v57	O-	XX	0.772727	0	0.119	0	0.227273
v57	O-	Y-	0.545455	0.119	0	0	0.454545
v57	OO	_B	0.27	0	0	0	0.73
v57	OO	_D	0.71	0.24	0	0	0.29
v57	OO	_G	0.55	0	0	0	0.45
v57	OO	_O	0.7	0	0	0	0.3
v57	OO	_W	0.42	0	0	0	0.58
v57	OO	_X	0.39	0	0	0	0.61
v57	OO	_Y	0.33	0	0.119	0	0.67
v57	OO	BB	0.6	0	0	0	0.4
v57	OO	G-	0.31	0	0.119	0	0.69
v57	OO	GG	0.48	0	0	0	0.52
v57	OO	L-	0.78	0	0.119	0	0.22
v57	OO	O-	0.38	0	0	0	0.62
v57	OO	OO	1	0	0	0	0
v57	OO	PQ	0.58	0	0	0.24	0.42
v57	OO	Q	0.19	0	0	0	0.81
v57	OO	R-	0.52	0	0	0	0.48
v57	OO	W-	0.65	0	0	0	0.35
v57	OO	WW	0.47	0	0	0	0.53
v57	OO	X-	0.49	0	0	0	0.51
v57	OO	XX	0.31	0	0	0	0.69
v57	OO	Y-	0.11	0	0	0	0.89
v57	PQ	_B	0.198347	0.119	0	0	0.801653
v57	PQ	_D	0.586777	1.07	0.359	0	0.413223
v57	PQ	_G	0.636364	0.832	0	0	0.363636
v57	PQ	_O	0.495868	0	0.24	0	0.504132
v57	PQ	_W	0.479339	0.119	0	0	0.520661
v57	PQ	_X	0.31405	0.238	0	0	0.68595
v57	PQ	_Y	0.256198	0.834	0.119	0	0.743802
v57	PQ	BB	0.561983	0	0.119	0	0.438017
v57	PQ	G-	0.586777	0.356	0.238	0	0.413223
v57	PQ	GG	0.487603	0.478	0.359	0	0.512397
v57	PQ	L-	0.702479	0	0	0	0.297521
v57	PQ	O-	0.330579	0.718	0.24	0	0.669421
v57	PQ	OO	0.479339	0.119	0	0	0.520661
v57	PQ	PQ	1	0	0	0	0
v57	PQ	Q	0.173554	0.478	0	0.119	0.826446
v57	PQ	R-	0.421488	0.238	0	0	0.578512
v57	PQ	W-	0.760331	1.2	0.359	0.119	0.239669
v57	PQ	WW	0.553719	1.55	0.119	0.119	0.446281
v57	PQ	X-	0.380165	0.119	0.24	0.359	0.619835
v57	PQ	XX	0.22314	1.68	0.119	0	0.77686
v57	PQ	Y-	0.446281	0.478	0	0	0.553719
v57	Q	_B	0.537634	0	0	0	0.462366
v57	Q	_D	0.365591	0.238	0	0.24	0.634409
v57	Q	_G	0.333333	0.119	0	0	0.666667
v57	Q	_O	0.430108	0	0	0	0.569892
v57	Q	_W	0.172043	0	0	0	0.827957
v57	Q	_X	0.451613	0.359	0	0.24	0.548387
v57	Q	_Y	0.870968	0.356	0	0	0.129032
v57	Q	BB	0.462366	0.119	0	0	0.537634
v57	Q	G-	0.408602	0	0	0	0.591398
v57	Q	GG	0.645161	0.119	0	0	0.354839
v57	Q	L-	0.451613	0.119	0	0	0.548387
v57	Q	O-	0.688172	0.119	0	0.24	0.311828
v57	Q	OO	0.204301	0	0	0.24	0.795699
v57	Q	PQ	0.225806	0.119	0	0	0.774194
v57	Q	Q	1	0	0	0	0
v57	Q	R-	0.537634	0.119	0	0	0.462366
v57	Q	W-	0.290323	0	0	0	0.709677
v57	Q	WW	0.44086	0.119	0	0	0.55914
v57	Q	X-	0.763441	0.119	0	0	0.236559
v57	Q	XX	0.666667	0.48	0	0	0.333333
v57	Q	Y-	0.354839	0.119	0	0	0.645161
v57	R-	_B	0.240642	0.119	0.119	0	0.759358
v57	R-	_D	0.347594	0	0	0	0.652406
v57	R-	_G	0.203209	0	0	0	0.796791
v57	R-	_O	0.449198	0	0	0	0.550802
v57	R-	_W	0.149733	0	0	0	0.850267
v57	R-	_X	0.256684	0	0.119	0	0.743316
v57	R-	_Y	0.486631	0	0	0	0.513369
v57	R-	BB	0.385027	0	0	0	0.614973
v57	R-	G-	0.192513	0	0	0	0.807487
v57	R-	GG	0.524064	0	0	0	0.475936
v57	R-	L-	0.336898	0	0	0	0.663102
v57	R-	O-	0.545455	0	0.119	0	0.454545
v57	R-	OO	0.278075	0	0	0	0.721925
v57	R-	PQ	0.272727	0	0	0	0.727273
v57	R-	Q	0.26738	0	0	0	0.73262
v57	R-	R-	1	0	0	0	0
v57	R-	W-	0.475936	0	0	0	0.524064
v57	R-	WW	0.315508	0.119	0	0	0.684492
v57	R-	X-	0.385027	0	0	0	0.614973
v57	R-	XX	0.561497	0.119	0	0	0.438503
v57	R-	Y-	0.491979	0	0	0	0.508021
v57	W-	_B	0.156463	0	0	0	0.843537
v57	W-	_D	0.605442	0.955	0.478	0	0.394558
v57	W-	_G	0.462585	1.55	0.478	0	0.537415
v57	W-	_O	0.544218	0	0	0	0.455782
v57	W-	_W	0.367347	0	0	0	0.632653
v57	W-	_X	0.204082	0.359	0	0	0.795918
v57	W-	_Y	0.319728	1.43	0.238	0.119	0.680272
v57	W-	BB	0.44898	0	0	0	0.55102
v57	W-	G-	0.462585	0.356	0.359	0.119	0.537415
v57	W-	GG	0.353741	0.119	0	0	0.646259
v57	W-	L-	0.619048	0	0	0	0.380952
v57	W-	O-	0.333333	0.119	0.356	0	0.666667
v57	W-	OO	0.442177	0	0	0	0.557823
v57	W-	PQ	0.62585	0.238	0	0	0.37415
v57	W-	Q	0.183673	0.356	0	0.24	0.816327
v57	W-	R-	0.605442	0	0	0	0.394558
v57	W-	W-	1	0	0	0	0
v57	W-	WW	0.503401	3.59	1.2	0.24	0.496599
v57	W-	X-	0.326531	0	0.119	0.119	0.673469
v57	W-	XX	0.319728	0.359	0	0	0.680272
v57	W-	Y-	0.462585	0	0.119	0	0.537415
v57	WW	_B	0.345588	0	0.119	0	0.654412
v57	WW	_D	0.375	0.596	0.24	0.119	0.625
v57	WW	_G	0.573529	1.79	0.119	0	0.426471
v57	WW	_O	0.301471	0	0	0	0.698529
v57	WW	_W	0.580882	0	0	0	0.419118
v57	WW	_X	0.463235	0.478	0.356	0	0.536765
v57	WW	_Y	0.272059	0.119	0.119	0	0.727941
v57	WW	BB	0.573529	0	0.359	0	0.426471
v57	WW	G-	0.617647	0.119	0.119	0	0.382353
v57	WW	GG	0.507353	0	0	0	0.492647
v57	WW	L-	0.580882	0	0	0	0.419118
v57	WW	O-	0.25	0	0	0	0.75
v57	WW	OO	0.345588	0	0.119	0	0.654412
v57	WW	PQ	0.492647	0	0	0	0.507353
v57	WW	Q	0.301471	0.359	0	0	0.698529
v57	WW	R-	0.433824	0.119	0	0	0.566176
v57	WW	W-	0.544118	0.119	0	0	0.455882
v57	WW	WW	1	0	0	0	0
v57	WW	X-	0.448529	0	0.24	0	0.551471
v57	WW	XX	0.154412	0	0	0	0.845588
v57	WW	Y-	0.397059	0	0.24	0	0.602941
v57	X-	_B	0.545455	0	0	0	0.454545
v57	X-	_D	0.527273	0	0	0	0.472727
v57	X-	_G	0.545455	0.359	0.356	0	0.454545
v57	X-	_O	0.581818	0	0	0	0.418182
v57	X-	_W	0.345455	0	0	0	0.654545
v57	X-	_X	0.590909	0.119	0.24	0	0.409091
v57	X-	_Y	0.736364	0	0	0	0.263636
v57	X-	BB	0.718182	0	0.24	0	0.281818
v57	X-	G-	0.436364	0	0.119	0	0.563636
v57	X-	GG	0.663636	0	0.24	0	0.336364
v57	X-	L-	0.636364	0	0.119	0	0.363636
v57	X-	O-	0.681818	0	0.359	0	0.318182
v57	X-	OO	0.445455	0	0	0	0.554545
v57	X-	PQ	0.418182	0	0	0	0.581818
v57	X-	Q	0.645455	0	0	0	0.354545
v57	X-	R-	0.654545	0	0	0	0.345455
v57	X-	W-	0.436364	0	0.119	0	0.563636
v57	X-	WW	0.554545	0	0	0	0.445455
v57	X-	X-	1	0	0	0	0
v57	X-	XX	0.536364	0	0.24	0	0.463636
v57	X-	Y-	0.209091	0	0	0	0.790909
v57	XX	_B	0.244755	0	0	0	0.755245
v57	XX	_D	0.335664	0	0	0.119	0.664336
v57	XX	_G	0.167832	0	0	0	0.832168
v57	XX	_O	0.601399	0	0	0	0.398601
v57	XX	_W	0	0	0	0	1
v57	XX	_X	0.258741	0	0.359	0	0.741259
v57	XX	_Y	0.727273	0	0	0	0.272727
v57	XX	BB	0.328671	0	0.119	0	0.671329
v57	XX	G-	0.174825	0	0	0	0.825175
v57	XX	GG	0.72028	0	0	0	0.27972
v57	XX	L-	0.321678	0	0	0	0.678322
v57	XX	O-	0.713287	0	0.24	0	0.286713
v57	XX	OO	0.216783	0.119	0	0	0.783217
v57	XX	PQ	0.188811	0	0.24	0	0.811189
v57	XX	Q	0.433566	0	0	0	0.566434
v57	XX	R-	0.734266	0	0.119	0	0.265734
v57	XX	W-	0.328671	0	0	0	0.671329
v57	XX	WW	0.146853	0	0	0	0.853147
v57	XX	X-	0.412587	0	0	0	0.587413
v57	XX	XX	1	0	0	0	0
v57	XX	Y-	0.531469	0	0	0.119	0.468531
v57	Y-	_B	0.0229885	0	0	0	0.977011
v57	Y-	_D	0.12069	0	0	0	0.87931
v57	Y-	_G	0.195402	0	0	0	0.804598
v57	Y-	_O	0.258621	0	0	0	0.741379
v57	Y-	_W	0.183908	0	0	0	0.816092
v57	Y-	_X	0.091954	0	0	0	0.908046
v57	Y-	_Y	0.327586	0	0	0	0.672414
v57	Y-	BB	0.178161	0	0	0	0.821839
v57	Y-	G-	0.304598	0	0.359	0	0.695402
v57	Y-	GG	0.528736	0	0	0	0.471264
v57	Y-	L-	0.137931	0	0	0	0.862069
v57	Y-	O-	0.413793	0	0.119	0	0.586207
v57	Y-	OO	0.0632184	0	0	0	0.936782
v57	Y-	PQ	0.310345	0	0	0	0.689655
v57	Y-	Q	0.189655	0	0	0	0.810345
v57	Y-	R-	0.528736	0	0.119	0	0.471264
v57	Y-	W-	0.390805	0.119	0.24	0	0.609195
v57	Y-	WW	0.310345	0	0.238	0	0.689655
v57	Y-	X-	0.132184	0.119	0.24	0	0.867816
v57	Y-	XX	0.436782	0.238	0.119	0	0.563218
v57	Y-	Y-	1	0	0	0	0
v82	_B	_B	1	0	0	0	0
v82	_B	_D	0.269737	0.08	0	0.08	0.730263
v82	_B	_L	0.0855263	0.08	0	0	0.914474
v82	_B	_S	0.0723684	0	0	0.08	0.927632
v82	_B	_X	0.322368	0	0	0	0.677632
v82	_B	B-	0.243421	0	0	0	0.756579
v82	_B	BB	0.578947	0	0	0	0.421053
v82	_B	D-	0.782895	0.08	0	0	0.217105
v82	_B	G-	0	0	0	0	1
v82	_B	GG	0.0394737	0	0	0	0.960526
v82	_B	L-	0.0460526	0	0	0	0.953947
v82	_B	LL	0	0	0	0	1
v82	_B	OO	0.230263	0	0.08	0	0.769737
v82	_B	PQ	0.651316	0	0	0	0.348684
v82	_B	Q	0.309211	0.16	0	0	0.690789
v82	_B	R-	0.0263158	0	0	0	0.973684
v82	_B	RR	0.486842	0	0	0	0.513158
v82	_B	S-	0.0394737	0	0.08	0	0.960526
v82	_B	SS	0	0	0	0	1
v82	_B	X-	0	0	0	0	1
v82	_B	XX	0.684211	0	0	0.08	0.315789
v82	_B	Y-	0.519737	0	0.08	0	0.480263
v82	_D	_B	0.280822	0.08	0	0	0.719178
v82	_D	_D	1	0	0	0	0
v82	_D	_L	0.136986	0	0.08	0	0.863014
v82	_D	_S	0.00684931	0	0	0	0.993151
v82	_D	_X	0.534247	0.08	0.16	0	0.465753
v82	_D	B-	0.623288	0	0	0	0.376712
v82	_D	BB	0.479452	0.08	0	0	0.520548
v82	_D	D-	0.527397	0.08	0.08	0.08	0.472603
v82	_D	G-	0	0	0	0	1
v82	_D	GG	0	0	0	0	1
v82	_D	L-	0.0136986	0	0	0	0.986301
v82	_D	LL	0.0342466	0	0.08	0	0.965753
v82	_D	OO	0.417808	0	0.08	0.08	0.582192
v82	_D	PQ	0.486301	0.8	0.08	0.08	0.513699
v82	_D	Q	0.383562	0.56	0	0	0.616438
v82	_D	R-	0	0.32	0	0	1
v82	_D	RR	0.582192	0	0	0	0.417808
v82	_D	S-	0	0	0	0	1
v82	_D	SS	0	0	0	0	1
v82	_D	X-	0	0	0	0	1
v82	_D	XX	0.260274	0.08	0	0.08	0.739726
v82	_D	Y-	0.561644	1.28	0.16	0.96	0.438356
v82	_L	_B	0.175676	0	0	0	0.824324
v82	_L	_D	0.27027	0	0	0	0.72973
v82	_L	_L	1	0	0	0	0
v82	_L	_S	0.202703	0	0.08	0	0.797297
v82	_L	_X	0.324324	0	0	0.08	0.675676
v82	_L	B-	0.432432	0.08	0	0	0.567568
v82	_L	BB	0.364865	0	0	0	0.635135
v82	_L	D-	0.0945946	0	0.16	0	0.905405
v82	_L	G-	0.27027	0	0	0	0.72973
v82	_L	GG	0.135135	0	0	0	0.864865
v82	_L	L-	0.391892	0	0	0	0.608108
v82	_L	LL	0.297297	0	0	0	0.702703
v82	_L	OO	0.72973	0	0	0	0.27027
v82	_L	PQ	0.324324	0	0.08	0	0.675676
v82	_L	Q	0.581081	0.16	0	0	0.418919
v82	_L	R-	0.378378	0.32	0	0	0.621622
v82	_L	RR	0.5	0	0	0	0.5
v82	_L	S-	0.554054	0	0	0	0.445946
v82	_L	SS	0.175676	0	0.08	0	0.824324
v82	_L	X-	0.216216	0	0	0	0.783784
v82	_L	XX	0.027027	0	0	0.08	0.972973
v82	_L	Y-	0.5	0.16	0.08	0.08	0.5
v82	_S	_B	0.192982	0	0	0	0.807018
v82	_S	_D	0.0175439	0	0.08	0	0.982456
v82	_S	_L	0.263158	0	0	0	0.736842
v82	_S	_S	1	0	0	0	0
v82	_S	_X	0.45614	0	0	0	0.54386
v82	_S	B-	0	0	0	0	1
v82	_S	BB	0	0	0	0	1
v82	_S	D-	0.315789	0	0	0	0.684211
v82	_S	G-	0.298246	0	0	0	0.701754
v82	_S	GG	0.438596	0	0	0	0.561404
v82	_S	L-	0.684211	0	0	0	0.315789
v82	_S	LL	0.54386	0	0	0	0.45614
v82	_S	OO	0.54386	0	0.08	0	0.45614
v82	_S	PQ	0.122807	0	0	0	0.877193
v82	_S	Q	0.157895	0.08	0	0	0.842105
v82	_S	R-	0.578947	0	0	0	0.421053
v82	_S	RR	0.403509	0	0.08	0	0.596491
v82	_S	S-	0.649123	0	0	0	0.350877
v82	_S	SS	0.315789	0	0.12	0	0.684211
v82	_S	X-	0.438596	0	0	0	0.561404
v82	_S	XX	0.54386	0	0	0	0.45614
v82	_S	Y-	0.491228	0	0.08	0.08	0.508772
v82	_X	_B	0.28655	0	0.08	0	0.71345
v82	_X	_D	0.45614	0.08	0.08	0	0.54386
v82	_X	_L	0.140351	0	0	0	0.859649
v82	_X	_S	0.152047	0	0	0	0.847953
v82	_X	_X	1	0	0	0	0
v82	_X	B-	0.309942	0.08	0	0	0.690058
v82	_X	BB	0.491228	0.08	0	0	0.508772
v82	_X	D-	0.672515	0.32	0	0	0.327485
v82	_X	G-	0	0	0	0	1
v82	_X	GG	0.0175439	0	0	0	0.982456
v82	_X	L-	0.163743	0	0	0	0.836257
v82	_X	LL	0.0877193	0	0	0	0.912281
v82	_X	OO	0.491228	0	0	0	0.508772
v82	_X	PQ	0.584795	0.56	0	0	0.415205
v82	_X	Q	0.508772	0.16	0	0	0.491228
v82	_X	R-	0.0584795	0	0	0	0.94152
v82	_X	RR	0.54386	0.08	0	0	0.45614
v82	_X	S-	0.0935673	0	0	0	0.906433
v82	_X	SS	0.0467836	0	0	0	0.953216
v82	_X	X-	0.0467836	0	0	0	0.953216
v82	_X	XX	0.374269	0	0	0	0.625731
v82	_X	Y-	0.71345	0.08	0.08	0.08	0.28655
v82	B-	_B	0.321739	0	0	0	0.678261
v82	B-	_D	0.791304	0	0	0	0.208696
v82	B-	_L	0.278261	0	0	0	0.721739
v82	B-	_S	0	0	0	0	1
v82	B-	_X	0.46087	0	0	0	0.53913
v82	B-	B-	1	0	0	0	0
v82	B-	BB	0.547826	0	0	0	0.452174
v82	B-	D-	0.417391	0	0	0	0.582609
v82	B-	G-	0	0	0	0	1
v82	B-	GG	0	0	0	0	1
v82	B-	L-	0	0	0	0	1
v82	B-	LL	0.0869565	0	0	0	0.913043
v82	B-	OO	0.582609	0	0	0	0.417391
v82	B-	PQ	0.678261	0	0	0	0.321739
v82	B-	Q	0.4	0.16	0	0	0.6
v82	B-	R-	0	0	0	0	1
v82	B-	RR	0.695652	0	0	0	0.304348
v82	B-	S-	0.0521739	0	0	0	0.947826
v82	B-	SS	0	0	0	0	1
v82	B-	X-	0	0	0	0	1
v82	B-	XX	0	0	0	0	1
v82	B-	Y-	0.643478	0	0	0	0.356522
v82	BB	_B	0.539877	0	0	0	0.460123
v82	BB	_D	0.429448	0	0	0.16	0.570552
v82	BB	_L	0.165644	0	0	0	0.834356
v82	BB	_S	0	0	0	0	1
v82	BB	_X	0.515337	0	0	0	0.484663
v82	BB	B-	0.386503	0	0	0	0.613497
v82	BB	BB	1	0	0	0	0
v82	BB	D-	0.748466	0	0	0.08	0.251534
v82	BB	G-	0.00613497	0	0	0	0.993865
v82	BB	GG	0.0122699	0	0	0	0.98773
v82	BB	L-	0.0613497	0	0	0	0.93865
v82	BB	LL	0.0245399	0	0	0	0.97546
v82	BB	OO	0.386503	0	0	0	0.613497
v82	BB	PQ	0.773006	0	0	0.08	0.226994
v82	BB	Q	0.595092	0.32	0	0	0.404908
v82	BB	R-	0.0245399	0	0	0	0.97546
v82	BB	RR	0.595092	0	0	0	0.404908
v82	BB	S-	0.0368098	0	0	0	0.96319
v82	BB	SS	0.0306748	0	0	0	0.969325
v82	BB	X-	0.0122699	0	0	0	0.98773
v82	BB	XX	0.398773	0.08	0	0	0.601227
v82	BB	Y-	0.570552	0	0.24	0	0.429448
v82	D-	_B	0.574879	0	0	0	0.425121
v82	D-	_D	0.371981	0	0	0	0.628019
v82	D-	_L	0.0338164	0	0	0	0.966184
v82	D-	_S	0.0869565	0	0	0	0.913043
v82	D-	_X	0.555556	0.08	0.16	0	0.444444
v82	D-	B-	0.231884	0	0	0	0.768116
v82	D-	BB	0.589372	0	0	0	0.410628
v82	D-	D-	1	0	0	0	0
v82	D-	G-	0.0144928	0	0	0	0.985507
v82	D-	GG	0.0434783	0	0	0	0.956522
v82	D-	L-	0.0917874	0	0	0	0.908213
v82	D-	LL	0.0241546	0	0	0	0.975845
v82	D-	OO	0.289855	0	0	0	0.710145
v82	D-	PQ	0.603865	0	0.08	0	0.396135
v82	D-	Q	0.439614	0.24	0	0	0.560386
v82	D-	R-	0.0386473	0	0	0	0.961353
v82	D-	RR	0.555556	0	0	0	0.444444
v82	D-	S-	0.0338164	0	0	0	0.966184
v82	D-	SS	0.0386473	0	0.12	0	0.961353
v82	D-	X-	0	0.08	0	0	1
v82	D-	XX	0.671498	0	0	0	0.328502
v82	D-	Y-	0.642512	0.08	0.08	0.32	0.357488
v82	G-	_B	0	0	0	0	1
v82	G-	_D	0	0.08	0	0.08	1
v82	G-	_L	0.588235	0	0	0	0.411765
v82	G-	_S	0.5	0	0	0	0.5
v82	G-	_X	0	0	0	0	1
v82	G-	B-	0	0	0	0	1
v82	G-	BB	0.0294118	0	0	0	0.970588
v82	G-	D-	0.0882353	0	0	0.08	0.911765
v82	G-	G-	1	0	0	0	0
v82	G-	GG	0.647059	0	0	0	0.352941
v82	G-	L-	0.823529	0	0	0	0.176471
v82	G-	LL	0.5	0	0	0	0.5
v82	G-	OO	0.0882353	0	0	0	0.911765
v82	G-	PQ	0	0	0.08	0.08	1
v82	G-	Q	0.323529	0	0	0	0.676471
v82	G-	R-	0.970588	0	0	0	0.0294118
v82	G-	RR	0	0	0	0	1
v82	G-	S-	0.911765	0	0	0	0.0882353
v82	G-	SS	0.617647	0	0	0	0.382353
v82	G-	X-	0.735294	0	0	0	0.264706
v82	G-	XX	0.323529	0	0	0	0.676471
v82	G-	Y-	0	0	0	0	1
v82	GG	_B	0.171429	0	0	0	0.828571
v82	GG	_D	0	0	0	0	1
v82	GG	_L	0.285714	0	0	0	0.714286
v82	GG	_S	0.714286	0	0	0	0.285714
v82	GG	_X	0.0857143	0	0	0	0.914286
v82	GG	B-	0	0	0	0	1
v82	GG	BB	0.0571429	0	0	0	0.942857
v82	GG	D-	0.257143	0	0	0.08	0.742857
v82	GG	G-	0.628571	0	0	0	0.371429
v82	GG	GG	1	0	0	0	0
v82	GG	L-	0.657143	0	0	0	0.342857
v82	GG	LL	0.657143	0	0	0	0.342857
v82	GG	OO	0.0285714	0	0	0	0.971429
v82	GG	PQ	0	0	0.16	0.08	1
v82	GG	Q	0.114286	0	0	0	0.885714
v82	GG	R-	0.942857	0	0	0	0.0571429
v82	GG	RR	0.2	0	0	0.08	0.8
v82	GG	S-	0.942857	0	0	0	0.0571429
v82	GG	SS	0.457143	0	0	0	0.542857
v82	GG	X-	0.742857	0	0	0	0.257143
v82	GG	XX	0.6	0	0	0	0.4
v82	GG	Y-	0.171429	0	0	0.24	0.828571
v82	L-	_B	0.1	0	0	0	0.9
v82	L-	_D	0.0285714	0.08	0	0	0.971429
v82	L-	_L	0.414286	0	0	0	0.585714
v82	L-	_S	0.557143	0	0	0	0.442857
v82	L-	_X	0.4	0	0	0	0.6
v82	L-	B-	0	0	0	0	1
v82	L-	BB	0.142857	0	0	0	0.857143
v82	L-	D-	0.271429	0.08	0	0	0.728571
v82	L-	G-	0.4	0	0	0	0.6
v82	L-	GG	0.328571	0	0	0	0.671429
v82	L-	L-	1	0	0	0	0
v82	L-	LL	0.314286	0	0	0	0.685714
v82	L-	OO	0.471429	0	0	0	0.528571
v82	L-	PQ	0.2	0	0	0.08	0.8
v82	L-	Q	0.414286	0	0	0	0.585714
v82	L-	R-	0.657143	0	0	0	0.342857
v82	L-	RR	0.242857	0	0	0	0.757143
v82	L-	S-	0.642857	0	0	0	0.357143
v82	L-	SS	0.385714	0	0	0	0.614286
v82	L-	X-	0.485714	0	0	0	0.514286
v82	L-	XX	0.457143	0	0.16	0	0.542857
v82	L-	Y-	0.314286	0	0.08	0.08	0.685714
v82	LL	_B	0	0	0	0	1
v82	LL	_D	0.111111	0.08	0.08	0	0.888889
v82	LL	_L	0.488889	0	0	0	0.511111
v82	LL	_S	0.688889	0	0	0	0.311111
v82	LL	_X	0.333333	0	0	0	0.666667
v82	LL	B-	0.222222	0	0	0	0.777778
v82	LL	BB	0.0888889	0	0	0	0.911111
v82	LL	D-	0.111111	0	0.16	0	0.888889
v82	LL	G-	0.377778	0	0	0	0.622222
v82	LL	GG	0.511111	0	0	0	0.488889
v82	LL	L-	0.488889	0	0	0	0.511111
v82	LL	LL	1	0	0	0	0
v82	LL	OO	0.488889	0	0	0.08	0.511111
v82	LL	PQ	0.0222222	0	0	0.08	0.977778
v82	LL	Q	0.155556	0	0	0	0.844444
v82	LL	R-	0.577778	0	0	0	0.422222
[truncated: 2,198 more rows]

## Sheet: brood_all nests
nest	cell no.	X	Y	Slice	contents	contents new	tot_cells
v14	1	4.594	2.835	12	X	X	114
v14	2	5.043	2.629	12	E	E	114
v14	3	5.554	2.45	12	E	E	114
v14	4	5.976	2.405	12	E	E	114
v14	5	6.371	2.297	12	X	X	114
v14	6	4.415	3.131	16	E	E	114
v14	7	4.872	3.042	16	E	E	114
v14	8	5.33	2.925	16	E	E	114
v14	9	5.796	2.826	16	E	E	114
v14	10	6.218	2.728	16	E	E	114
v14	11	6.667	2.638	16	E	E	114
v14	12	4.72	3.472	13	E	E	114
v14	13	5.15	3.41	13	L	L	114
v14	14	5.644	3.293	13	E	L	114
v14	15	6.119	3.203	13	E	E	114
v14	16	6.532	3.122	13	E	E	114
v14	17	6.945	2.988	12	E	E	114
v14	18	7.313	2.808	12	E	E	114
v14	19	4.522	3.912	13	E	E	114
v14	20	4.998	3.849	13	E	E	114
v14	21	5.455	3.786	13	E	E	114
v14	22	5.958	3.769	13	E	E	114
v14	23	6.415	3.598	13	L	L	114
v14	24	6.882	3.454	13	L	L	114
v14	25	7.241	3.32	14	L	L	114
v14	26	7.645	3.167	14	E	E	114
v14	27	7.923	3.033	14	E	E	114
v14	28	4.809	4.361	14	X	X	114
v14	29	5.222	4.325	14	E	E	114
v14	30	5.778	4.415	14	P	P	114
v14	31	6.317	4.325	14	P	P	114
v14	32	6.774	4.029	14	P	P	114
v14	33	7.205	3.912	15	E	E	114
v14	34	7.618	3.733	15	L	L	114
v14	35	8.031	3.553	15	L	L	114
v14	36	8.712	3.463	15	P	P	114
v14	37	4.666	4.711	15	L	L	114
v14	38	5.159	4.738	16	E	E	114
v14	39	5.599	4.72	19	E	E	114
v14	40	6.083	4.738	14	E	E	114
v14	41	6.649	4.549	14	L	L	114
v14	42	7.061	4.397	11	E	E	114
v14	43	7.6	4.415	11	P	P	114
v14	44	7.914	4.029	9	L	L	114
v14	45	8.264	3.903	6	E	E	114
v14	46	8.748	3.831	6	E	E	114
v14	47	4.63	5.034	7	E	E	114
v14	48	4.953	5.07	7	E	E	114
v14	49	5.357	5.15	7	E	E	114
v14	50	5.904	5.141	8	E	E	114
v14	51	6.433	4.998	5	L	L	114
v14	52	6.99	4.917	5	P	P	114
v14	53	7.367	4.756	9	E	E	114
v14	54	7.788	4.576	11	L	L	114
v14	55	8.237	4.441	12	E	E	114
v14	56	8.578	4.19	12	L	L	114
v14	57	8.937	4.056	12	E	E	114
v14	58	4.989	5.402	19	E	E	114
v14	59	5.321	5.572	21	E	E	114
v14	60	5.823	5.563	21	L	L	114
v14	61	6.281	5.473	22	L	L	114
v14	62	6.801	5.339	22	E	L	114
v14	63	7.25	5.213	23	L	L	114
v14	64	7.618	5.007	23	L	L	114
v14	65	8.04	4.8	23	E	E	114
v14	66	8.479	4.711	23	E	E	114
v14	67	8.829	4.486	23	L	L	114
v14	68	9.269	4.432	24	X	X	114
v14	69	5.168	5.734	29	E	L	114
v14	70	5.626	5.976	33	E	E	114
v14	71	6.128	5.994	33	E	E	114
v14	72	6.604	5.868	34	E	L	114
v14	73	7.097	5.689	34	L	L	114
v14	74	7.51	5.446	35	E	E	114
v14	75	7.968	5.249	35	E	E	114
v14	76	8.354	5.132	40	L	L	114
v14	77	8.775	4.953	40	E	E	114
v14	78	9.098	4.863	40	E	E	114
v14	79	9.394	4.738	40	E	E	114
v14	80	5.68	6.371	52	E	E	114
v14	81	5.985	6.38	52	E	E	114
v14	82	6.415	6.424	52	E	E	114
v14	83	6.936	6.182	52	L	L	114
v14	84	7.429	5.967	52	E	L	114
v14	85	7.833	5.698	52	E	E	114
v14	86	8.246	5.572	52	E	E	114
v14	87	8.811	5.509	52	P	P	114
v14	88	9.027	5.258	52	L	L	114
v14	89	9.35	5.141	52	L	L	114
v14	90	5.994	6.721	57	E	E	114
v14	91	6.263	6.73	57	E	E	114
v14	92	6.756	6.703	57	E	E	114
v14	93	7.268	6.541	57	L	L	114
v14	94	7.752	6.227	59	L	L	114
v14	95	8.129	6.003	60	L	L	114
v14	96	8.533	5.886	63	L	L	114
v14	97	9.044	5.859	68	E	E	114
v14	98	9.35	5.671	68	E	E	114
v14	99	6.218	6.927	74	E	E	114
v14	100	6.55	6.963	74	E	E	114
v14	101	7.214	7.026	74	P	P	114
v14	102	7.716	6.783	74	E	E	114
v14	103	8.022	6.559	75	L	L	114
v14	104	8.443	6.38	70	E	E	114
v14	105	8.847	6.218	69	E	E	114
v14	106	9.206	6.128	72	L	L	114
v14	107	7.591	7.088	72	X	X	114
v14	108	7.986	6.963	72	L	L	114
v14	109	8.372	6.81	72	E	E	114
v14	110	8.766	6.721	72	P	P	114
v14	111	7.932	7.205	72	E	E	114
v14	112	8.3	7.124	72	E	E	114
v14	113	4.244	3.598	72	X	X	114
v14	114	4.504	4.37	72	E	E	114
v57	1	6.678	1.119	6	E		122
v57	2	6.983	1.138	6	X		122
v57	3	7.409	1.202	6	L		122
v57	4	7.89	1.304	6	E		122
v57	5	8.204	1.461	6	E		122
v57	6	5.476	1.572	3	X		122
v57	7	5.799	1.517	3	E		122
v57	8	6.197	1.471	3	X		122
v57	9	6.613	1.517	3	E		122
v57	10	7.057	1.517	3	E		122
v57	11	7.501	1.637	4	E		122
v57	12	7.899	1.776	4	E		122
v57	13	8.324	1.868	4	X		122
v57	14	8.759	1.998	4	X		122
v57	15	5.207	1.952	4	X		122
v57	16	5.494	1.878	4	E		122
v57	17	5.873	1.822	4	X		122
v57	18	6.262	1.776	4	P		122
v57	19	6.734	1.896	4	E		122
v57	20	7.15	1.924	4	L		122
v57	21	7.621	1.989	4	X		122
v57	22	8.065	2.072	4	L		122
v57	23	8.5	2.211	4	E		122
v57	24	8.944	2.423	4	E		122
v57	25	4.976	2.285	4	X		122
v57	26	5.244	2.257	4	E		122
v57	27	5.633	2.229	4	L		122
v57	28	5.984	2.192	4	P		122
v57	29	6.419	2.229	4	P		122
v57	30	6.872	2.322	4	L		122
v57	31	7.335	2.312	4	L		122
v57	32	7.769	2.414	4	E		122
v57	33	8.223	2.516	4	L		122
v57	34	8.657	2.618	4	L		122
v57	35	4.81	2.581	4	X		122
v57	36	5.041	2.581	4	X		122
v57	37	5.383	2.59	4	L		122
v57	38	5.79	2.618	4	E	L	122
v57	39	6.206	2.636	4	P		122
v57	40	6.65	2.71	4	L		122
v57	41	7.057	2.719	4	L		122
v57	42	7.464	2.775	4	L		122
v57	43	7.917	2.84	6	X		122
v57	44	8.38	2.969	6	X		122
v57	45	8.824	3.052	6	E		122
v57	46	4.837	2.914	6	E		122
v57	47	5.115	2.951	6	X		122
v57	48	5.559	2.988	6	E		122
v57	49	5.975	3.052	6	L		122
v57	50	6.382	3.08	6	X		122
v57	51	6.808	3.099	6	L		122
v57	52	7.214	3.136	6	E		122
v57	53	7.649	3.2	6	E		122
v57	54	8.121	3.284	6	E		122
v57	55	8.583	3.348	6	E		122
v57	56	8.972	3.478	6	E		122
v57	57	4.699	3.339	6	E		122
v57	58	4.921	3.321	6	X		122
v57	59	5.281	3.339	6	E		122
v57	60	5.679	3.376	6	P		122
v57	61	6.16	3.478	6	E		122
v57	62	6.595	3.515	6	X		122
v57	63	6.983	3.543	6	E		122
v57	64	7.409	3.607	6	X		122
v57	65	7.853	3.616	6	L		122
v57	66	8.306	3.709	6	X		122
v57	67	8.722	3.764	6	E		122
v57	68	4.8	3.737	6	E		122
v57	69	5.087	3.746	6	E	L	122
v57	70	5.466	3.764	6	E		122
v57	71	5.91	3.829	6	L		122
v57	72	6.299	3.912	6	X		122
v57	73	6.678	3.968	6	P		122
v57	74	7.085	4.051	6	X		122
v57	75	7.538	4.051	6	P		122
v57	76	8.047	4.088	6	L		122
v57	77	8.491	4.144	6	E		122
v57	78	4.939	4.116	6	E	L	122
v57	79	5.244	4.134	6	E	L	122
v57	80	5.651	4.171	6	L		122
v57	81	6.058	4.236	6	L		122
v57	82	6.502	4.31	6	L		122
v57	83	6.9	4.356	6	L		122
v57	84	7.325	4.458	7	E	L	122
v57	85	7.742	4.449	7	P		122
v57	86	8.26	4.467	8	E		122
v57	87	8.704	4.495	8	E		122
v57	88	8.944	4.153	8	E		122
v57	89	5.161	4.495	12	E		122
v57	90	5.429	4.523	12	E		122
v57	91	5.781	4.615	14	L		122
v57	92	6.197	4.68	14	L		122
v57	93	6.669	4.726	14	L		122
v57	94	7.057	4.81	14	L		122
v57	95	7.557	4.828	14	E	L	122
v57	96	8.019	4.856	14	E	L	122
v57	97	8.482	4.856	14	L		122
v57	98	8.87	4.874	14	L		122
v57	99	5.402	4.828	14	E	L	122
v57	100	5.67	4.911	14	E	L	122
v57	101	6.003	5.004	14	L		122
v57	102	6.401	5.096	14	X		122
v57	103	6.835	5.18	14	L		122
v57	104	7.298	5.207	14	L		122
v57	105	7.779	5.244	14	P		122
v57	106	8.269	5.254	15	E		122
v57	107	8.676	5.254	15	E	L	122
v57	108	5.855	5.309	15	E		122
v57	109	6.225	5.411	15	E		122
v57	110	6.623	5.476	15	L		122
v57	111	7.085	5.559	15	L		122
v57	112	7.566	5.596	15	L		122
v57	113	8.001	5.624	16	L		122
v57	114	8.463	5.596	16	L		122
v57	115	6.068	5.698	17	L		122
v57	116	6.438	5.753	17	L		122
v57	117	6.808	5.883	17	E	L	122
v57	118	7.298	5.938	17	X		122
v57	119	7.779	5.966	17	X	L	122
v57	120	5.226	1.591	17	X		122
v57	121	7.057	6.16	17	X		122
v57	122	7.529	6.216	17	X	X	122
v72	1	7.666	1.471	3	X	X	144
v72	2	8.049	1.559	3	X	X	144
v72	3	8.902	1.794	1	X	X	144
v72	4	9.362	1.97	3	X	X	144
v72	5	9.784	2.167	12	X	X	144
v72	6	10.284	2.314	12	E	E	144
v72	7	7.696	1.814	12	X	X	144
v72	8	8.166	1.892	12	L	L	144
v72	9	8.588	2.088	12	X	X	144
v72	10	8.98	2.314	7	L	L	144
v72	11	9.441	2.441	7	X	X	144
v72	12	9.901	2.647	14	L	L	144
v72	13	10.333	2.804	14	L	X	144
v72	14	7.411	2.088	17	X	X	144
v72	15	7.853	2.167	18	L	L	144
v72	16	8.245	2.382	18	X	X	144
v72	17	8.656	2.598	19	L	L	144
v72	18	9.068	2.774	19	L	L	144
v72	19	9.529	2.961	21	L	L	144
v72	20	10.039	3.127	21	L	L	144
v72	21	10.48	3.284	20	L	L	144
v72	22	10.892	3.402	20	L	L	144
v72	23	7.49	2.51	20	X	X	144
v72	24	7.911	2.696	20	X	X	144
v72	25	8.323	2.902	20	X	X	144
v72	26	8.735	3.068	22	X	X	144
v72	27	9.215	3.235	24	L	L	144
v72	28	9.696	3.441	24	X	L	144
v72	29	10.156	3.578	24	L	L	144
v72	30	10.686	3.706	24	X	X	144
v72	31	11.019	3.814	24	L	L	144
v72	32	7.137	2.833	24	X	X	144
v72	33	7.539	3	20	X	X	144
v72	34	7.98	3.216	20	L	L	144
v72	35	8.392	3.372	20	L	L	144
v72	36	8.862	3.568	20	E	E	144
v72	37	9.333	3.745	20	E	E	144
v72	38	9.813	3.921	20	X	X	144
v72	39	10.323	4.029	20	E	E	144
v72	40	10.794	4.206	20	E	E	144
v72	41	11.117	4.323	20	P	X	144
v72	42	6.578	2.99	20	P	X	144
v72	43	7.206	3.304	20	X	X	144
v72	44	7.607	3.51	20	L	L	144
v72	45	8.078	3.696	20	L	L	144
v72	46	8.509	3.853	21	L	L	144
v72	47	8.951	4.049	21	L	L	144
v72	48	9.46	4.225	21	L	L	144
v72	49	9.96	4.392	21	E	E	144
v72	50	10.48	4.529	21	E	E	144
v72	51	10.892	4.657	21	E	E	144
v72	52	11.186	4.735	21	X	X	144
v72	53	6.804	3.617	21	X	X	144
v72	54	7.284	3.804	21	L	L	144
v72	55	7.686	4.019	21	L	L	144
v72	56	8.127	4.186	21	L	L	144
v72	57	8.617	4.363	21	X	E	144
v72	58	9.098	4.578	21	L	L	144
v72	59	9.588	4.715	21	E	E	144
v72	60	10.127	4.912	21	E	E	144
v72	61	10.637	5.117	25	P	P	144
v72	62	10.999	5.235	25	L	L	144
v72	63	11.294	5.353	28	X	X	144
v72	64	6.402	3.951	28	X	X	144
v72	65	6.862	4.108	28	L	L	144
v72	66	7.333	4.304	28	E	E	144
v72	67	7.804	4.51	28	L	L	144
v72	68	8.264	4.647	28	X	E	144
v72	69	8.754	4.882	25	E	E	144
v72	70	9.225	5.068	26	E	E	144
v72	71	9.715	5.264	27	E	E	144
v72	72	10.264	5.48	29	P	X	144
v72	73	10.686	5.608	29	L	L	144
v72	74	11.137	5.764	30	L	L	144
v72	75	11.313	5.804	30	X	X	144
v72	76	6.46	4.451	30	E	E	144
v72	77	6.931	4.617	30	E	E	144
v72	78	7.421	4.843	30	L	L	144
v72	79	7.872	5.01	30	E	E	144
v72	80	8.343	5.186	30	X	X	144
v72	81	8.853	5.451	32	P	P	144
v72	82	9.303	5.598	32	L	L	144
v72	83	9.862	5.853	32	L	L	144
v72	84	10.343	6.019	32	L	E	144
v72	85	10.764	6.137	32	L	L	144
v72	86	11.137	6.255	36	X	X	144
v72	87	11.323	6.304	36	X	X	144
v72	88	6.029	4.813	36	X	X	144
v72	89	6.47	4.961	36	E	E	144
v72	90	7	5.166	38	L	L	144
v72	91	7.441	5.343	38	E	E	144
v72	92	7.931	5.539	38	E	E	144
v72	93	8.382	5.764	38	E	E	144
v72	94	8.892	5.96	38	E	E	144
v72	95	9.402	6.186	38	E	E	144
v72	96	9.921	6.421	38	E	E	144
v72	97	10.431	6.568	38	E	E	144
v72	98	10.794	6.657	38	L	L	144
v72	99	11.156	6.764	38	X	X	144
v72	100	6.196	5.353	38	X	X	144
v72	101	6.598	5.421	38	E	E	144
v72	102	7.039	5.627	38	E	E	144
v72	103	7.529	5.853	38	L	L	144
v72	104	7.98	6.049	38	E	E	144
v72	105	8.47	6.284	39	E	E	144
v72	106	8.931	6.509	38	E	E	144
v72	107	9.48	6.774	38	E	E	144
v72	108	10	6.98	38	P	P	144
v72	109	10.45	7.029	38	E	E	144
v72	110	10.774	7.078	38	L	L	144
v72	111	10.999	7.098	38	L	L	144
v72	112	6.245	5.911	38	X	L	144
v72	113	6.666	5.902	38	L	E	144
v72	114	7.108	6.137	38	E	L	144
v72	115	7.549	6.382	38	L	P	144
v72	116	8.029	6.617	40	P	L	144
v72	117	8.5	6.843	40	L	E	144
v72	118	8.97	7.039	40	E	E	144
v72	119	9.519	7.255	41	E	L	144
v72	120	9.97	7.421	41	L	L	144
v72	121	10.313	7.617	41	E	E	144
v72	122	6.647	6.509	41	E	E	144
v72	123	7.108	6.666	41	E	E	144
v72	124	7.598	6.833	41	L	L	144
v72	125	8.068	7.078	41	L	L	144
v72	126	8.539	7.382	41	L	L	144
v72	127	9.058	7.578	41	E	E	144
v72	128	9.529	7.686	41	L	L	144
v72	129	9.921	7.804	41	L	L	144
v72	130	6.353	6.882	41	X	L	144
v72	131	6.735	6.941	41	L	E	144
v72	132	7.206	7.088	41	E	L	144
v72	133	7.647	7.304	41	L	L	144
v72	134	8.098	7.676	41	E	E	144
v72	135	8.627	7.892	41	E	E	144
v72	136	9.088	8.009	41	L	L	144
v72	137	9.402	8.029	41	E	E	144
v72	138	6.902	7.255	41	X	X	144
v72	139	7.264	7.519	41	X	X	144
v72	140	7.666	7.755	41	E	E	144
v72	141	8.215	8.019	41	X	X	144
v72	142	8.882	8.098	41	X	X	144
v72	143	9.451	8.127	41	X	X	144
v72	144	9.549	8.205	41	X	X	144
v82	1	5.106	3.605	11	E	E	139
v82	2	5.438	2.558	11	E	E	139
v82	3	5.325	3.116	11	E	E	139
v82	4	5.281	3.457	11	X	X	139
v82	5	5.246	4.111	11	E	E	139
v82	6	5.482	4.705	11	X	X	139
v82	7	5.691	5.063	11	E	E	139
v82	8	5.822	1.999	11	E	E	139
v82	9	5.717	2.374	11	L	X	139
v82	10	5.665	2.776	11	L	L	139
v82	11	5.578	3.291	11	L	L	139
v82	12	5.525	3.815	11	P	P	139
v82	13	5.674	4.364	11	P	P	139
v82	14	5.831	4.836	11	X	X	139
v82	15	6.171	5.29	11	X	X	139
v82	16	6.215	5.691	11	E	E	139
v82	17	6.075	1.693	12	E	E	139
v82	18	6.128	2.06	12	L	L	139
v82	19	6.023	2.47	12	P	P	139
v82	20	5.953	2.942	12	P	P	139
v82	21	6.023	3.492	12	L	L	139
v82	22	5.971	4.015	12	P	P	139
v82	23	6.049	4.364	12	PAR	PAR
v82	24	6.101	4.757	12	P	P	139
v82	25	6.294	5.115	12	L	L	139
v82	26	6.407	5.752	12	X	X	139
v82	27	6.39	1.484	12	E	E	139
v82	28	6.442	1.763	12	L	L	139
v82	29	6.512	2.243	12	E	E	139
v82	30	6.547	2.793	12	E	E	139
v82	31	6.459	3.238	12	L	L	139
v82	32	6.424	3.692	13	L	L	139
v82	33	6.442	4.26	13	E	E	139
v82	34	6.8	0.978	13	E	E	139
v82	35	6.835	1.379	13	P	P	139
v82	36	6.913	1.999	13	E	E	139
v82	37	6.966	2.496	13	L	L	139
v82	38	6.896	2.968	13	L	L	139
v82	39	6.861	3.448	13	E	E	139
v82	40	6.817	3.954	12	P	P	139
v82	41	6.826	4.434	12	L	L	139
v82	42	6.686	4.984	12	P	P	139
v82	43	6.651	5.482	12	P	P	139
v82	44	6.66	5.883	12	X	X	139
v82	45	7.297	0.742	12	E	E	139
v82	46	7.35	1.17	12	P	P	139
v82	47	7.367	1.711	12	E	E	139
v82	48	7.341	2.243	12	L	L	139
v82	49	7.324	2.662	12	P	P	139
v82	50	7.35	3.16	13	P	P	139
v82	51	7.28	3.692	12	X	X	139
v82	52	7.219	4.199	12	E	E	139
v82	53	7.166	4.644	12	X	X	139
v82	54	7.053	5.22	12	E	E	139
v82	55	7.001	5.787	12	P	P	139
v82	56	7.76	0.637	12	E	E	139
v82	57	7.795	1.056	12	L	L	139
v82	58	7.839	1.449	12	P	L	139
v82	59	7.743	2.016	12	L	L	139
v82	60	7.786	2.47	12	P	P	139
v82	61	7.734	3.038	13	L	L	139
v82	62	7.699	3.526	13	E	E	139
v82	63	7.612	3.963	13	E	E	139
v82	64	7.62	4.591	14	P	P	139
v82	65	7.498	5.028	14	X	E	139
v82	66	7.454	5.578	14	X	X	139
v82	67	8.153	0.646	15	E	E	139
v82	68	8.214	0.917	15	X	X	139
v82	69	8.301	1.248	15	P	P	139
v82	70	8.231	1.781	15	E	L	139
v82	71	8.153	2.322	15	L	L	139
v82	72	8.179	2.785	15	P	P	139
v82	73	8.074	3.291	15	X	X	139
v82	74	8.109	3.797	15	P	P	139
v82	75	8.048	4.347	15	P	P	139
v82	76	7.961	4.792	15	L	L	139
v82	77	7.9	5.342	15	E	E	139
v82	78	7.891	6.032	15	P	P	139
v82	79	8.598	0.672	15	E	E	139
v82	80	8.703	1.056	15	P	P	139
v82	81	8.685	1.536	15	X	X	139
v82	82	8.624	2.069	15	E	E	139
v82	83	8.563	2.592	10	L	L	139
v82	84	8.519	3.055	12	E	E	139
v82	85	8.528	3.588	9	E	E	139
v82	86	8.423	4.103	9	E	E	139
v82	87	8.354	4.53	9	L	L	139
v82	88	8.362	5.133	9	E	E	139
v82	89	8.354	5.901	9	P	P	139
v82	90	8.258	6.259	9	X	X	139
v82	91	9.113	0.899	9	E	L	139
v82	92	9.148	1.309	9	P	P	139
v82	93	9.148	1.798	9	P	P	139
v82	94	9.017	2.374	9	E	E	139
v82	95	8.982	2.881	10	L	L	139
v82	96	8.938	3.413	12	L	L	139
v82	97	8.886	3.893	15	L	L	139
v82	98	8.807	4.408	15	E	E	139
v82	99	8.773	4.975	18	X	E	139
v82	100	8.755	5.517	19	X	X	139
v82	101	8.807	6.136	22	P	P	139
v82	102	9.506	1.283	22	E	E	139
v82	103	9.523	1.536	22	L	L	139
v82	104	9.514	1.746	22	L	L	139
v82	105	9.558	2.139	22	P	P	139
v82	106	9.445	2.671	22	E	E	139
v82	107	9.41	3.238	22	E	E	139
v82	108	9.384	3.727	23	E	E	139
v82	109	9.314	4.242	23	X	E	139
v82	110	9.261	4.749	25	E	E	139
v82	111	9.288	5.342	27	P	P	139
v82	112	9.27	5.848	27	P	P	139
v82	113	9.968	1.475	25	X	X	139
v82	114	9.933	1.667	25	L	L	139
v82	115	9.925	1.99	25	L	L	139
v82	116	10.003	2.47	25	P	P	139
v82	117	9.925	2.985	25	P	P	139
v82	118	9.933	3.535	25	P	P	139
v82	119	9.829	4.05	25	P	P	139
v82	120	9.645	4.478	25	L	L	139
v82	121	9.68	5.071	25	P	P	139
v82	122	9.602	5.49	25	L	L	139
v82	123	10.309	2.121	25	X	X	139
v82	124	10.37	2.374	25	L	L	139
v82	125	10.405	2.785	25	P	P	139
v82	126	10.414	3.326	25	P	P	139
v82	127	10.265	3.884	25	X	X	139
v82	128	10.064	4.277	25	L	L	139
v82	129	9.96	4.749	25	L	L	139
v82	130	9.977	5.098	25	L	L	139
v82	131	9.942	5.316	25	X	X	139
v82	132	10.675	2.558	25	X	X	139
v82	133	10.71	3.029	25	X	L	139
v82	134	10.667	3.657	25	X	X	139
v82	135	10.492	4.199	25	X	X	139
v82	136	10.3	4.661	25	X	X	139
v82	137	10.955	2.837	25	X	X	139
v82	138	10.92	3.439	25	X	X	139
v82	139	10.841	3.98	25	X	X	139
v82	140	7.393	6.032	25	L	L	139
v87	1	7.758	1.533	13	E	E	158
v87	2	8.149	1.533	13	E	E	158
v87	3	8.674	1.595	13	E	E	158
v87	4	9.116	1.739	12	E	E	158
v87	5	9.528	1.873	12	E	E	158
v87	6	9.95	2.089	12	E	E	158
v87	7	7.913	1.842	12	E	E	158
v87	8	8.324	1.945	12	E	E	158
v87	9	8.746	2.068	13	E	E	158
v87	10	9.23	2.161	13	P	P	158
v87	11	9.621	2.367	13	L	p	158
v87	12	10.073	2.531	13	L	p	158
v87	13	10.567	2.727	13	P	P	158
v87	14	7.563	2.161	13	E	E	158
v87	15	7.964	2.223	13	E	E	158
v87	16	8.396	2.336	13	L	L	158
v87	17	8.87	2.428	13	P	P	158
v87	18	9.23	2.686	13	L	L	158
v87	19	9.693	2.819	13	E	E	158
v87	20	10.135	2.974	13	E	E	158
v87	21	10.629	3.097	13	L	L	158
v87	22	10.999	3.2	13	E	L	158
v87	23	7.666	2.593	3	E	L	158
v87	24	8.098	2.686	3	L	L	158
v87	25	8.551	2.778	3	P	P	158
v87	26	8.942	3.025	1	E	E	158
v87	27	9.384	3.2	1	L	L	158
v87	28	9.847	3.375	1	L	L	158
v87	29	10.361	3.478	1	P	P	158
v87	30	10.763	3.581	3	L	L	158
v87	31	11.205	3.663	3	E	L	158
v87	32	7.316	2.871	31	E	E	158
v87	33	7.769	3.005	31	E	E	158
v87	34	8.19	3.159	31	L	L	158
v87	35	8.612	3.344	31	L	L	158
v87	36	9.024	3.498	35	L	L	158
v87	37	9.549	3.632	35	P	P	158
v87	38	9.991	3.817	34	E	E	158
v87	39	10.495	3.91	34	P	P	158
v87	40	10.958	4.023	34	L	L	158
v87	41	11.38	4.126	34	E	L	158
v87	42	7.357	3.334	37	L	L	158
v87	43	7.841	3.478	37	P	P	158
v87	44	8.283	3.642	37	E	E	158
v87	45	8.705	3.787	37	L	L	158
v87	46	9.219	3.992	37	P	P	158
v87	47	9.693	4.116	37	P	P	158
v87	48	10.166	4.301	37	P	P	158
v87	49	10.67	4.373	37	L	L	158
v87	50	11.133	4.517	37	L	L	158
v87	51	11.534	4.61	37	E	E	158
v87	52	6.976	3.632	37	L	L	158
v87	53	7.46	3.807	37	P	P	158
v87	54	7.943	4.003	39	E	E	158
v87	55	8.386	4.147	40	L	L	158
v87	56	8.808	4.291	40	E	E	158
v87	57	9.291	4.445	40	E	E	158
v87	58	9.785	4.589	40	L	E	158
v87	59	10.31	4.723	40	P	P	158
v87	60	10.773	4.867	40	L	P	158
v87	61	11.236	4.99	40	L	L	158
v87	62	11.596	5.073	40	L	L	158
v87	63	11.751	4.754	40	X	X	158
v87	64	11.771	5.134	40	E	E	158
v87	65	6.729	4.105	40	E	E	158
v87	66	7.028	4.105	40	P	P	158
v87	67	7.614	4.28	40	L	L	158
v87	68	8.046	4.476	40	L	L	158
v87	69	8.468	4.62	43	E	E	158
v87	70	8.942	4.764	43	E	E	158
v87	71	9.446	4.918	43	E	E	158
v87	72	9.95	5.083	43	P	P	158
v87	73	10.444	5.237	43	P	P	158
v87	74	10.866	5.371	43	L	L	158
v87	75	11.308	5.525	44	L	L	158
v87	76	11.586	5.587	48	E	E	158
v87	77	6.524	4.352	48	E	E	158
v87	78	6.781	4.445	48	L	L	158
v87	79	7.223	4.62	47	E	E	158
v87	80	7.594	4.815	49	P	P	158
v87	81	8.17	4.939	50	E	E	158
v87	82	8.695	5.124	51	P	P	158
v87	83	9.096	5.258	51	P	P	158
v87	84	9.59	5.464	52	P	P	158
v87	85	10.125	5.618	52	P	P	158
v87	86	10.557	5.762	52	L	L	158
v87	87	10.969	5.906	52	L	L	158
v87	88	11.38	5.947	52	E	E	158
v87	89	11.627	5.937	52	E	E	158
v87	90	6.431	4.949	52	E	E	158
v87	91	6.812	4.97	52	L	L	158
v87	92	7.285	5.114	52	P	P	158
v87	93	7.789	5.278	52	E	L	158
v87	94	8.232	5.464	52	P	P	158
v87	95	8.715	5.577	52	L	L	158
v87	96	9.178	5.752	52	L	L	158
v87	97	9.652	5.916	52	E	E	158
v87	98	10.269	6.184	52	P	E	158
v87	99	10.722	6.338	52	P	P	158
v87	100	11.133	6.421	52	L	L	158
v87	101	11.493	6.441	52	E	E	158
v87	102	6.462	5.392	52	L	L	158
v87	103	6.884	5.474	52	L	L	158
v87	104	7.419	5.608	52	E	E	158
v87	105	7.861	5.855	52	P	P	158
v87	106	8.365	5.937	56	L	L	158
v87	107	8.777	6.102	56	L	L	158
v87	108	9.261	6.318	56	L	L	158
v87	109	9.847	6.565	56	P	P	158
v87	110	10.279	6.688	56	L	L	158
v87	111	10.742	6.832	56	L	L	158
v87	112	11.185	6.894	58	L	L	158
v87	113	11.442	6.966	58	E	E	158
v87	114	6.534	5.814	59	L	X	158
v87	115	6.987	5.947	59	L	L	158
v87	116	7.419	6.194	59	P	P	158
v87	117	7.974	6.235	59	L	L	158
v87	118	8.427	6.472	59	L	L	158
v87	119	8.849	6.729	61	P	P	158
v87	120	9.363	6.853	61	L	L	158
v87	121	9.909	7.1	62	P	P	158
v87	122	10.361	7.233	62	L	L	158
v87	123	10.804	7.326	64	L	L	158
v87	124	11.143	7.419	64	E	E	158
v87	125	6.606	6.338	69	L	L	158
v87	126	7.069	6.482	69	E	E	158
v87	127	7.48	6.709	69	P	P	158
v87	128	8.015	6.801	69	L	L	158
v87	129	8.468	6.987	74	L	L	158
v87	130	8.962	7.182	74	E	L	158
v87	131	9.425	7.398	74	L	L	158
v87	132	9.94	7.532	74	L	P	158
v87	133	10.382	7.686	74	L	L	158
v87	134	10.794	7.727	77	E	E	158
v87	135	6.657	6.832	76	X	L	158
v87	136	7.141	7.007	76	L	P	158
v87	137	7.542	7.233	77	P	P	158
v87	138	8.005	7.316	77	P	P	158
v87	139	8.53	7.501	77	E	L	158
v87	140	9.014	7.666	77	L	L	158
v87	141	9.477	7.861	77	L	L	158
v87	142	9.96	7.954	77	L	L	158
v87	143	10.392	8.036	77	E	E	158
v87	144	10.639	8.077	77	E	E	158
v87	145	7.285	7.46	83	L	L	158
v87	146	7.666	7.624	83	E	E	158
v87	147	8.088	7.83	85	L	X	158
v87	148	8.54	8.057	86	L	L	158
v87	149	9.075	8.211	86	L	L	158
v87	150	9.6	8.273	89	L	L	158
v87	151	9.919	8.283	89	E	E	158
v87	152	7.398	7.985	97	E	E	158
v87	153	7.707	7.995	97	L	L	158
v87	154	8.16	8.211	97	E	E	158
v87	155	8.623	8.479	99	L	L	158
v87	156	9.199	8.499	99	E	E	158
v87	157	7.83	8.345	99	L	L	158
v87	158	8.242	8.551	99	L	X	158
v99	1	6.233	1.076	6	E	E	217
v99	2	6.579	0.922	6	E	E	217
v99	3	6.915	0.864	6	X	X	217
v99	4	7.251	0.749	6	E	E	217
v99	5	7.578	0.653	6	X	X	217
v99	6	5.647	1.565	6	E	E	217
v99	7	5.83	1.489	6	X	X	217
v99	8	6.08	1.316	6	L	L	217
v99	9	6.473	1.143	6	L	L	217
v99	10	6.79	1.114	6	X	X	217
v99	11	7.155	0.922	6	X	X	217
v99	12	7.443	0.816	6	L	L	217
v99	13	7.77	0.72	6	X	X	217
v99	14	8.058	0.605	6	E	E	217
v99	15	5.369	2.046	11	E	E	217
v99	16	5.561	1.873	11	E	E	217
v99	17	5.743	1.758	11	L	L	217
v99	18	6.031	1.758	11	L	L	217
v99	19	6.444	1.546	11	P	P	217
v99	20	6.896	1.45	11	P	P	217
v99	21	7.27	1.22	11	P	P	217
v99	22	7.683	1.085	17	P	P	217
v99	23	8.125	0.951	17	P	P	217
v99	24	8.385	0.826	17	E	E	217
v99	25	5.148	2.43	17	E	E	217
v99	26	5.359	2.353	17	L	L	217
v99	27	5.522	2.286	17	L	L	217
v99	28	5.849	2.18	17	P	P	217
v99	29	6.387	2.007	17	P	P	217
v99	30	6.867	1.988	17	E	E	217
v99	31	7.242	1.7	17	P	P	217
v99	32	7.655	1.604	18	X	X	217
v99	33	8.087	1.421	25	P	P	217
v99	34	8.509	1.22	25	P	P	217
v99	35	8.894	1.172	28	L	L	217
v99	36	4.917	2.872	29	E	E	217
v99	37	5.119	2.766	29	E	E	217
v99	38	5.359	2.67	29	E	E	217
v99	39	5.628	2.641	29	L	L	217
v99	40	5.878	2.66	29	P	P	217
v99	41	6.425	2.612	29	L	L	217
v99	42	6.819	2.42	29	L	L	217
v99	43	7.242	2.286	29	L	L	217
v99	44	7.655	2.161	29	L	L	217
v99	45	8.029	1.94	29	L	L	217
v99	46	8.452	1.777	29	X	X	217
v99	47	8.855	1.527	29	P	P	217
v99	48	9.249	1.373	29	P	P	217
v99	49	4.514	3.602	31	E	E	217
v99	50	4.745	3.573	31	L	L	217
v99	51	5.071	3.573	31	L	L	217
v99	52	5.35	3.275	31	P	P	217
v99	53	5.897	3.179	31	X	X	217
v99	54	6.329	3.016	30	L	L	217
v99	55	6.752	2.785	30	L	L	217
v99	56	7.194	2.708	31	L	L	217
v99	57	7.607	2.507	31	L	L	217
v99	58	8.02	2.334	31	L	L	217
v99	59	8.413	2.199	31	L	L	217
v99	60	8.778	2.027	31	E	E	217
v99	61	9.239	1.748	31	P	P	217
v99	62	9.508	1.614	31	P	P	217
v99	63	4.149	4.197	38	E	E	217
v99	64	4.389	4.13	38	L	L	217
v99	65	4.773	3.976	38	P	P	217
v99	66	5.34	3.765	38	P	P	217
v99	67	5.868	3.659	42	L	L	217
v99	68	6.291	3.515	42	L	L	217
v99	69	6.665	3.189	42	P	P	217
v99	70	7.126	3.112	46	P	P	217
v99	71	7.578	2.92	46	P	P	217
v99	72	7.962	2.785	46	E	E	217
v99	73	8.413	2.593	58	P	P	217
v99	74	8.769	2.478	58	X	X	217
v99	75	9.191	2.286	58	L	L	217
v99	76	9.652	1.988	58	P	P	217
v99	77	4.495	4.725	59	E	E	217
v99	78	4.658	4.629	59	L	L	217
v99	79	4.889	4.552	59	L	L	217
v99	80	5.244	4.264	59	P	P	217
v99	81	5.83	4.13	59	E	E	217
v99	82	6.214	3.957	59	L	L	217
v99	83	6.637	3.64	59	P	P	217
v99	84	7.098	3.506	59	P	P	217
v99	85	7.491	3.371	71	P	P	217
v99	86	7.924	3.227	71	E	E	217
v99	87	8.375	3.006	71	P	P	217
v99	88	8.817	2.843	71	P	P	217
v99	89	9.172	2.651	71	L	L	217
v99	90	9.72	2.43	71	P	P	217
v99	91	4.6	5.436	70	E	E	217
v99	92	4.764	5.321	70	L	L	217
v99	93	5.013	5.129	70	L	L	217
v99	94	5.148	4.716	70	P	P	217
v99	95	5.743	4.591	70	L	L	217
v99	96	6.185	4.418	70	L	L	217
v99	97	6.579	4.101	70	P	P	217
v99	98	7.05	3.957	70	P	P	217
v99	99	7.472	3.871	70	L	L	217
v99	100	7.866	3.621	70	P	P	217
v99	101	8.327	3.429	70	P	P	217
v99	102	8.721	3.323	71	E	E	217
v99	103	9.172	3.121	75	E	E	217
v99	104	9.633	2.891	75	P	P	217
v99	105	4.821	5.763	91	L	L	217
v99	106	5.052	5.474	91	E	E	217
v99	107	5.378	5.311	91	L	L	217
v99	108	5.724	5.1	93	X	X	217
v99	109	6.137	4.85	93	L	L	217
v99	110	6.531	4.581	93	P	P	217
v99	111	7.002	4.456	94	E	E	217
v99	112	7.405	4.274	93	L	L	217
v99	113	7.856	4.082	93	P	P	217
v99	114	8.298	3.928	93	P	P	217
v99	115	8.663	3.794	93	X	X	217
v99	116	9.124	3.496	93	P	P	217
v99	117	9.604	3.323	95	P	P	217
v99	118	4.745	6.272	92	L	L	217
v99	119	4.946	6.07	92	L	L	217
v99	120	5.157	5.753	92	P	P	217
v99	121	5.695	5.522	92	E	E	217
v99	122	6.166	5.35	92	L	L	217
v99	123	6.464	5.052	92	P	P	217
v99	124	6.944	4.831	93	P	P	217
v99	125	7.338	4.706	94	L	L	217
v99	126	7.799	4.552	94	P	P	217
v99	127	8.231	4.389	94	P	P	217
v99	128	8.634	4.245	94	E	E	217
v99	129	9.105	3.947	93	P	P	217
v99	130	9.604	3.726	95	P	P	217
v99	131	9.883	3.659	98	E	E	217
v99	132	4.793	6.742	98	E	E	217
v99	133	5.071	6.502	98	L	L	217
v99	134	5.321	6.243	98	L	L	217
v99	135	5.638	6.022	102	E	E	217
v99	136	6.156	5.82	102	L	L	217
v99	137	6.521	5.58	102	X	X	217
v99	138	6.905	5.311	105	P	P	217
v99	139	7.338	5.157	105	X	X	217
v99	140	7.741	4.975	105	P	P	217
v99	141	8.135	4.889	105	X	X	217
v99	142	8.663	4.639	105	P	P	217
v99	143	8.99	4.466	94	X	X	217
v99	144	9.518	4.168	99	P	P	217
v99	145	9.844	4.178	99	E	E	217
v99	146	5.109	6.915	101	L	L	217
v99	147	5.33	6.771	101	L	L	217
v99	148	5.647	6.512	101	X	X	217
v99	149	6.08	6.272	101	E	E	217
v99	150	6.531	6.089	101	L	L	217
v99	151	6.905	5.878	101	X	X	217
v99	152	7.357	5.657	100	X	X	217
v99	153	7.722	5.465	100	E	E	217
v99	154	8.116	5.311	100	X	X	217
v99	155	8.481	5.138	105	X	X	217
v99	156	8.98	4.908	105	X	X	217
v99	157	9.489	4.6	105	P	P	217
v99	158	9.844	4.495	105	E	E	217
v99	159	5.282	7.309	106	E	E	217
v99	160	5.446	7.174	106	L	L	217
v99	161	5.647	6.982	106	L	L	217
v99	162	5.945	6.781	106	P	P	217
v99	163	6.464	6.569	103	E	E	217
v99	164	6.896	6.339	103	L	L	217
v99	165	7.28	6.108	103	P	P	217
v99	166	7.683	5.887	99	P	P	217
v99	167	8.077	5.705	99	E	E	217
v99	168	8.5	5.484	90	X	X	217
v99	169	8.932	5.311	82	X	X	217
v99	170	9.499	5.071	82	P	P	217
v99	171	9.921	4.86	82	P	P	217
v99	172	5.551	7.587	82	E	E	217
v99	173	5.763	7.434	82	L	L	217
v99	174	6.06	7.251	82	X	X	217
v99	175	6.454	7.078	82	X	X	217
v99	176	6.896	6.829	82	E	E	217
v99	177	7.328	6.598	82	L	L	217
v99	178	7.674	6.454	85	P	P	217
v99	179	8.125	6.137	85	X	X	217
v99	180	8.557	5.983	84	P	P	217
v99	181	8.97	5.772	84	P	P	217
v99	182	9.326	5.551	84	X	X	217
v99	183	9.796	5.33	84	L	L	217
v99	184	6.031	7.741	88	X	X	217
v99	185	6.339	7.607	88	P	P	217
v99	186	6.896	7.299	88	X	X	217
v99	187	7.299	7.088	90	X	X	217
v99	188	7.731	6.838	90	L	L	217
v99	189	8.125	6.637	75	X	X	217
v99	190	8.529	6.387	75	L	L	217
v99	191	8.961	6.214	77	P	P	217
v99	192	9.499	6.003	77	P	P	217
v99	193	9.787	5.753	77	L	L	217
v99	194	10.123	5.599	77	E	E	217
v99	195	6.665	7.943	75	X	X	217
v99	196	6.963	7.722	75	X	X	217
v99	197	7.29	7.559	75	X	X	217
v99	198	7.741	7.376	75	X	X	217
v99	199	8.183	7.194	75	P	P	217
v99	200	8.586	6.905	75	L	L	217
v99	201	8.961	6.665	76	L	L	217
v99	202	9.374	6.454	76	L	L	217
v99	203	9.94	6.252	76	P	P	217
v99	204	10.152	5.926	76	L	L	217
v99	205	7.29	7.981	75	X	X	217
v99	206	7.77	7.856	75	P	P	217
v99	207	8.164	7.559	75	L	L	217
v99	208	8.615	7.415	76	P	P	217
v99	209	8.97	7.126	76	X	X	217
v99	210	9.46	6.953	76	P	P	217
v99	211	9.864	6.723	76	P	P	217
v99	212	10.209	6.598	80	X	X	217
v99	213	8.154	7.914	79	L	L	217
v99	214	8.577	7.722	79	X	X	217
v99	215	8.942	7.511	79	L	L	217
v99	216	9.278	7.28	79	L	L	217
v99	217	9.604	7.155	80	E	E	217

## Sheet: compos_linear regression
id	nest	occupancy	rand.lar.prop	non_lar	rand.lar	Significance	unique_id	dummy
_B	v57	0	0.24	0.76	9	1	1	1
_B	v57	0	0.24	0.76	9	1	1	1
_B	v57	0	0.3	0.7	11	1	1	1
_B	v57	0	0.3	0.7	11	1	1	1
_B	v57	0	0.32	0.68	12	1	1	1
_B	v57	1	0.27	0.73	NA	1	1	1
_D	v57	0	0.38	0.62	14	1	2	1
_D	v57	0	0.41	0.59	15	1	2	1
_D	v57	0	0.3	0.7	11	1	2	1
_D	v57	0	0.38	0.62	14	1	2	1
_D	v57	0	0.41	0.59	15	1	2	1
_D	v57	1	0.22	0.78	NA	1	2	1
_G	v57	0	0.43	0.57	16	1	3	1
_G	v57	0	0.27	0.73	10	1	3	1
_G	v57	0	0.43	0.57	16	1	3	1
_G	v57	0	0.32	0.68	12	1	3	1
_G	v57	0	0.35	0.65	13	1	3	1
_G	v57	1	0.22	0.78	NA	1	3	1
_O	v57	0	0.38	0.62	14	0	4	1
_O	v57	0	0.49	0.51	18	0	4	1
_O	v57	0	0.43	0.57	16	0	4	1
_O	v57	0	0.51	0.49	19	0	4	1
_O	v57	0	0.51	0.49	19	0	4	1
_O	v57	1	0.24	0.76	NA	0	4	1
_W	v57	0	0.27	0.73	10	1	5	1
_W	v57	0	0.41	0.59	15	1	5	1
_W	v57	0	0.38	0.62	14	1	5	1
_W	v57	0	0.16	0.84	6	1	5	1
_W	v57	0	0.35	0.65	13	1	5	1
_W	v57	1	0.24	0.76	NA	1	5	1
_X	v57	0	0.38	0.62	14	1	6	1
_X	v57	0	0.3	0.7	11	1	6	1
_X	v57	0	0.3	0.7	11	1	6	1
_X	v57	0	0.38	0.62	14	1	6	1
_X	v57	0	0.3	0.7	11	1	6	1
_X	v57	1	0.3	0.7	NA	1	6	1
_Y	v57	0	0.57	0.43	21	0	7	1
_Y	v57	0	0.57	0.43	21	0	7	1
_Y	v57	0	0.49	0.51	18	0	7	1
_Y	v57	0	0.51	0.49	19	0	7	1
_Y	v57	0	0.54	0.46	20	0	7	1
_Y	v57	1	0.51	0.49	NA	0	7	1
BB	v57	0	0.51	0.49	19	0	8	1
BB	v57	0	0.49	0.51	18	0	8	1
BB	v57	0	0.59	0.41	22	0	8	1
BB	v57	0	0.41	0.59	15	0	8	1
BB	v57	0	0.57	0.43	21	0	8	1
BB	v57	1	0.35	0.65	NA	0	8	1
G-	v57	0	0.38	0.62	14	0	9	1
G-	v57	0	0.32	0.68	12	0	9	1
G-	v57	0	0.54	0.46	20	0	9	1
G-	v57	0	0.32	0.68	12	0	9	1
G-	v57	0	0.46	0.54	17	0	9	1
G-	v57	1	0.49	0.51	NA	0	9	1
GG	v57	0	0.76	0.24	28	0	10	1
GG	v57	0	0.76	0.24	28	0	10	1
GG	v57	0	0.76	0.24	28	0	10	1
GG	v57	0	0.65	0.35	24	0	10	1
GG	v57	0	0.59	0.41	22	0	10	1
GG	v57	1	0.38	0.62	NA	0	10	1
L-	v57	0	0.57	0.43	21	1	11	1
L-	v57	0	0.57	0.43	21	1	11	1
L-	v57	0	0.38	0.62	14	1	11	1
L-	v57	0	0.38	0.62	14	1	11	1
L-	v57	0	0.51	0.49	19	1	11	1
L-	v57	1	0.27	0.73	NA	1	11	1
O-	v57	0	0.51	0.49	19	0	12	1
O-	v57	0	0.35	0.65	13	0	12	1
O-	v57	0	0.57	0.43	21	0	12	1
O-	v57	0	0.46	0.54	17	0	12	1
O-	v57	0	0.57	0.43	21	0	12	1
O-	v57	1	0.51	0.49	NA	0	12	1
OO	v57	0	0.41	0.59	15	1	13	1
OO	v57	0	0.32	0.68	12	1	13	1
OO	v57	0	0.38	0.62	14	1	13	1
OO	v57	0	0.32	0.68	12	1	13	1
OO	v57	0	0.41	0.59	15	1	13	1
OO	v57	1	0.27	0.73	NA	1	13	1
PQ	v57	0	0.43	0.57	16	0	14	1
PQ	v57	0	0.38	0.62	14	0	14	1
PQ	v57	0	0.43	0.57	16	0	14	1
PQ	v57	0	0.49	0.51	18	0	14	1
PQ	v57	0	0.41	0.59	15	0	14	1
PQ	v57	1	0.35	0.65	NA	0	14	1
Q	v57	0	0.32	0.68	12	1	15	1
Q	v57	0	0.3	0.7	11	1	15	1
Q	v57	0	0.35	0.65	13	1	15	1
Q	v57	0	0.41	0.59	15	1	15	1
Q	v57	0	0.3	0.7	11	1	15	1
Q	v57	1	0.43	0.57	NA	1	15	1
R-	v57	0	0.73	0.27	27	0	16	1
R-	v57	0	0.59	0.41	22	0	16	1
R-	v57	0	0.76	0.24	28	0	16	1
R-	v57	0	0.65	0.35	24	0	16	1
R-	v57	0	0.62	0.38	23	0	16	1
R-	v57	1	0.51	0.49	NA	0	16	1
W-	v57	0	0.51	0.49	19	0	17	1
W-	v57	0	0.43	0.57	16	0	17	1
W-	v57	0	0.54	0.46	20	0	17	1
W-	v57	0	0.57	0.43	21	0	17	1
W-	v57	0	0.51	0.49	19	0	17	1
W-	v57	1	0.27	0.73	NA	0	17	1
WW	v57	0	0.57	0.43	21	0	18	1
WW	v57	0	0.57	0.43	21	0	18	1
WW	v57	0	0.43	0.57	16	0	18	1
WW	v57	0	0.51	0.49	19	0	18	1
WW	v57	0	0.43	0.57	16	0	18	1
WW	v57	1	0.46	0.54	NA	0	18	1
X-	v57	0	0.32	0.68	12	0	19	1
X-	v57	0	0.35	0.65	13	0	19	1
X-	v57	0	0.38	0.62	14	0	19	1
X-	v57	0	0.35	0.65	13	0	19	1
X-	v57	0	0.51	0.49	19	0	19	1
X-	v57	1	0.46	0.54	NA	0	19	1
XX	v57	0	0.49	0.51	18	0	20	1
XX	v57	0	0.51	0.49	19	0	20	1
XX	v57	0	0.38	0.62	14	0	20	1
XX	v57	0	0.41	0.59	15	0	20	1
XX	v57	0	0.51	0.49	19	0	20	1
XX	v57	1	0.38	0.62	NA	0	20	1
Y-	v57	0	0.76	0.24	28	0	21	1
Y-	v57	0	0.68	0.32	25	0	21	1
Y-	v57	0	0.65	0.35	24	0	21	1
Y-	v57	0	0.57	0.43	21	0	21	1
Y-	v57	0	0.62	0.38	23	0	21	1
Y-	v57	1	0.43	0.57	NA	0	21	1
_B	v82	0	0.35	0.65	12	1	22	1
_B	v82	0	0.32	0.68	11	1	22	1
_B	v82	0	0.35	0.65	12	1	22	1
_B	v82	0	0.53	0.47	18	1	22	1
_B	v82	0	0.35	0.65	12	1	22	1
_B	v82	1	0.32	0.68	NA	1	22	1
_D	v82	0	0.44	0.56	15	1	23	1
_D	v82	0	0.35	0.65	12	1	23	1
_D	v82	0	0.47	0.53	16	1	23	1
_D	v82	0	0.38	0.62	13	1	23	1
_D	v82	0	0.44	0.56	15	1	23	1
_D	v82	1	0.21	0.79	NA	1	23	1
_L	v82	0	0.18	0.82	6	1	24	1
_L	v82	0	0.21	0.79	7	1	24	1
_L	v82	0	0.32	0.68	11	1	24	1
_L	v82	0	0.21	0.79	7	1	24	1
_L	v82	0	0.18	0.82	6	1	24	1
_L	v82	1	0.12	0.88	NA	1	24	1
_S	v82	0	0.15	0.85	5	1	25	1
_S	v82	0	0.12	0.88	4	1	25	1
_S	v82	0	0.29	0.71	10	1	25	1
_S	v82	0	0.15	0.85	5	1	25	1
_S	v82	0	0.21	0.79	7	1	25	1
_S	v82	1	0.09	0.91	NA	1	25	1
_X	v82	0	0.47	0.53	16	0	26	1
_X	v82	0	0.47	0.53	16	0	26	1
_X	v82	0	0.44	0.56	15	0	26	1
_X	v82	0	0.44	0.56	15	0	26	1
_X	v82	0	0.47	0.53	16	0	26	1
_X	v82	1	0.47	0.53	NA	0	26	1
B-	v82	0	0.44	0.56	15	1	27	1
B-	v82	0	0.44	0.56	15	1	27	1
B-	v82	0	0.41	0.59	14	1	27	1
B-	v82	0	0.26	0.74	9	1	27	1
B-	v82	0	0.26	0.74	9	1	27	1
B-	v82	1	0.09	0.91	NA	1	27	1
BB	v82	0	0.32	0.68	11	0	28	1
BB	v82	0	0.47	0.53	16	0	28	1
BB	v82	0	0.44	0.56	15	0	28	1
BB	v82	0	0.47	0.53	16	0	28	1
BB	v82	0	0.47	0.53	16	0	28	1
BB	v82	1	0.38	0.62	NA	0	28	1
D-	v82	0	0.65	0.35	22	0	29	1
D-	v82	0	0.56	0.44	19	0	29	1
D-	v82	0	0.5	0.5	17	0	29	1
D-	v82	0	0.59	0.41	20	0	29	1
D-	v82	0	0.62	0.38	21	0	29	1
D-	v82	1	0.59	0.41	NA	0	29	1
G-	v82	0	0.03	0.97	1	1	30	1
G-	v82	0	0.03	0.97	1	1	30	1
G-	v82	0	0.18	0.82	6	1	30	1
G-	v82	0	0.09	0.91	3	1	30	1
G-	v82	0	0.09	0.91	3	1	30	1
G-	v82	1	0.12	0.88	NA	1	30	1
GG	v82	0	0.09	0.91	3	1	31	1
GG	v82	0	0.09	0.91	3	1	31	1
GG	v82	0	0.06	0.94	2	1	31	1
GG	v82	0	0.12	0.88	4	1	31	1
GG	v82	0	0.12	0.88	4	1	31	1
GG	v82	1	0.12	0.88	NA	1	31	1
L-	v82	0	0.21	0.79	7	1	32	1
L-	v82	0	0.18	0.82	6	1	32	1
L-	v82	0	0.24	0.76	8	1	32	1
L-	v82	0	0.18	0.82	6	1	32	1
L-	v82	0	0.24	0.76	8	1	32	1
L-	v82	1	0.15	0.85	NA	1	32	1
LL	v82	0	0.06	0.94	2	1	33	1
LL	v82	0	0.03	0.97	1	1	33	1
LL	v82	0	0.06	0.94	2	1	33	1
LL	v82	0	0.15	0.85	5	1	33	1
LL	v82	0	0.06	0.94	2	1	33	1
LL	v82	1	0.15	0.85	NA	1	33	1
OO	v82	0	0.41	0.59	14	0	34	1
OO	v82	0	0.38	0.62	13	0	34	1
OO	v82	0	0.44	0.56	15	0	34	1
OO	v82	0	0.41	0.59	14	0	34	1
OO	v82	0	0.38	0.62	13	0	34	1
OO	v82	1	0.26	0.74	NA	0	34	1
PQ	v82	0	0.47	0.53	16	0	35	1
PQ	v82	0	0.47	0.53	16	0	35	1
PQ	v82	0	0.44	0.56	15	0	35	1
PQ	v82	0	0.47	0.53	16	0	35	1
PQ	v82	0	0.5	0.5	17	0	35	1
PQ	v82	1	0.5	0.5	NA	0	35	1
Q	v82	0	0.35	0.65	12	0	36	1
Q	v82	0	0.44	0.56	15	0	36	1
Q	v82	0	0.41	0.59	14	0	36	1
Q	v82	0	0.38	0.62	13	0	36	1
Q	v82	0	0.38	0.62	13	0	36	1
Q	v82	1	0.47	0.53	NA	0	36	1
R-	v82	0	0.21	0.79	7	1	37	1
R-	v82	0	0.09	0.91	3	1	37	1
R-	v82	0	0.09	0.91	3	1	37	1
R-	v82	0	0.18	0.82	6	1	37	1
R-	v82	0	0.09	0.91	3	1	37	1
R-	v82	1	0.15	0.85	NA	1	37	1
RR	v82	0	0.41	0.59	14	0	38	1
RR	v82	0	0.62	0.38	21	0	38	1
RR	v82	0	0.41	0.59	14	0	38	1
RR	v82	0	0.47	0.53	16	0	38	1
RR	v82	0	0.44	0.56	15	0	38	1
RR	v82	1	0.29	0.71	NA	0	38	1
S-	v82	0	0.26	0.74	9	1	39	1
S-	v82	0	0.21	0.79	7	1	39	1
S-	v82	0	0.26	0.74	9	1	39	1
S-	v82	0	0.24	0.76	8	1	39	1
S-	v82	0	0.15	0.85	5	1	39	1
S-	v82	1	0.21	0.79	NA	1	39	1
SS	v82	0	0.09	0.91	3	1	40	1
SS	v82	0	0.03	0.97	1	1	40	1
SS	v82	0	0.12	0.88	4	1	40	1
SS	v82	0	0.18	0.82	6	1	40	1
SS	v82	0	0.06	0.94	2	1	40	1
SS	v82	1	0.12	0.88	NA	1	40	1
X-	v82	0	0.12	0.88	4	1	41	1
X-	v82	0	0.12	0.88	4	1	41	1
X-	v82	0	0.06	0.94	2	1	41	1
X-	v82	0	0.15	0.85	5	1	41	1
X-	v82	0	0.09	0.91	3	1	41	1
X-	v82	1	0.15	0.85	NA	1	41	1
XX	v82	0	0.44	0.56	15	0	42	1
XX	v82	0	0.47	0.53	16	0	42	1
XX	v82	0	0.47	0.53	16	0	42	1
XX	v82	0	0.44	0.56	15	0	42	1
XX	v82	0	0.47	0.53	16	0	42	1
XX	v82	1	0.38	0.62	NA	0	42	1
Y-	v82	0	0.5	0.5	17	0	43	1
Y-	v82	0	0.62	0.38	21	0	43	1
Y-	v82	0	0.53	0.47	18	0	43	1
Y-	v82	0	0.5	0.5	17	0	43	1
Y-	v82	0	0.59	0.41	20	0	43	1
Y-	v82	1	0.5	0.5	NA	0	43	1
_B	v87	0	0.323529	0.676471	22	1	44	1
_B	v87	0	0.338235	0.661765	23	1	44	1
_B	v87	0	0.323529	0.676471	22	1	44	1
_B	v87	0	0.338235	0.661765	23	1	44	1
_B	v87	0	0.338235	0.661765	23	1	44	1
_B	v87	1	0.43	0.57	NA	1	44	1
_D	v87	0	0.25	0.75	17	1	45	1
_D	v87	0	0.220588	0.779412	15	1	45	1
_D	v87	0	0.191176	0.808824	13	1	45	1
_D	v87	0	0.205882	0.794118	14	1	45	1
_D	v87	0	0.191176	0.808824	13	1	45	1
_D	v87	1	0.22	0.78	NA	1	45	1
_G	v87	0	0.308824	0.691176	21	1	46	1
_G	v87	0	0.352941	0.647059	24	1	46	1
_G	v87	0	0.352941	0.647059	24	1	46	1
_G	v87	0	0.308824	0.691176	21	1	46	1
_G	v87	0	0.367647	0.632353	25	1	46	1
_G	v87	1	0.38	0.62	NA	1	46	1
_L	v87	0	0.382353	0.617647	26	1	47	1
_L	v87	0	0.352941	0.647059	24	1	47	1
_L	v87	0	0.264706	0.735294	18	1	47	1
_L	v87	0	0.338235	0.661765	23	1	47	1
_L	v87	0	0.279412	0.720588	19	1	47	1
_L	v87	1	0.31	0.69	NA	1	47	1
_O	v87	0	0.220588	0.779412	15	1	48	1
_O	v87	0	0.308824	0.691176	21	1	48	1
_O	v87	0	0.264706	0.735294	18	1	48	1
_O	v87	0	0.264706	0.735294	18	1	48	1
_O	v87	0	0.25	0.75	17	1	48	1
_O	v87	1	0.38	0.62	NA	1	48	1
_R	v87	0	0.132353	0.867647	9	1	49	1
_R	v87	0	0.147059	0.852941	10	1	49	1
_R	v87	0	0.132353	0.867647	9	1	49	1
_R	v87	0	0.0735294	0.926471	5	1	49	1
_R	v87	0	0.117647	0.882353	8	1	49	1
_R	v87	1	0.15	0.85	NA	1	49	1
_S	v87	0	0.323529	0.676471	22	0	50	1
_S	v87	0	0.352941	0.647059	24	0	50	1
_S	v87	0	0.323529	0.676471	22	0	50	1
_S	v87	0	0.426471	0.573529	29	0	50	1
_S	v87	0	0.352941	0.647059	24	0	50	1
_S	v87	1	0.4	0.6	NA	0	50	1
_Y	v87	0	0.352941	0.647059	24	0	51	1
_Y	v87	0	0.382353	0.617647	26	0	51	1
_Y	v87	0	0.367647	0.632353	25	0	51	1
_Y	v87	0	0.367647	0.632353	25	0	51	1
_Y	v87	0	0.367647	0.632353	25	0	51	1
_Y	v87	1	0.4	0.6	NA	0	51	1
B-	v87	0	0.338235	0.661765	23	0	52	1
B-	v87	0	0.382353	0.617647	26	0	52	1
B-	v87	0	0.397059	0.602941	27	0	52	1
B-	v87	0	0.323529	0.676471	22	0	52	1
B-	v87	0	0.382353	0.617647	26	0	52	1
B-	v87	1	0.4	0.6	NA	0	52	1
BB	v87	0	0.220588	0.779412	15	1	53	1
BB	v87	0	0.279412	0.720588	19	1	53	1
BB	v87	0	0.294118	0.705882	20	1	53	1
BB	v87	0	0.235294	0.764706	16	1	53	1
BB	v87	0	0.220588	0.779412	15	1	53	1
BB	v87	1	0.22	0.78	NA	1	53	1
DD	v87	0	0.147059	0.852941	10	1	54	1
DD	v87	0	0.102941	0.897059	7	1	54	1
DD	v87	0	0.132353	0.867647	9	1	54	1
DD	v87	0	0.0588235	0.941176	4	1	54	1
DD	v87	0	0.102941	0.897059	7	1	54	1
DD	v87	1	0.12	0.88	NA	1	54	1
G-	v87	0	0.161765	0.838235	11	1	55	1
G-	v87	0	0.102941	0.897059	7	1	55	1
G-	v87	0	0.132353	0.867647	9	1	55	1
G-	v87	0	0.132353	0.867647	9	1	55	1
G-	v87	0	0.117647	0.882353	8	1	55	1
G-	v87	1	0.15	0.85	NA	1	55	1
GG	v87	0	0.132353	0.867647	9	1	56	1
GG	v87	0	0.0735294	0.926471	5	1	56	1
GG	v87	0	0.0735294	0.926471	5	1	56	1
GG	v87	0	0.0441176	0.955882	3	1	56	1
GG	v87	0	0.0735294	0.926471	5	1	56	1
GG	v87	1	0.1	0.9	NA	1	56	1
L-	v87	0	0.411765	0.588235	28	0	57	1
L-	v87	0	0.5	0.5	34	0	57	1
L-	v87	0	0.470588	0.529412	32	0	57	1
L-	v87	0	0.367647	0.632353	25	0	57	1
L-	v87	0	0.382353	0.617647	26	0	57	1
L-	v87	1	0.59	0.41	NA	0	57	1
O-	v87	0	0.117647	0.882353	8	1	58	1
O-	v87	0	0.0735294	0.926471	5	1	58	1
O-	v87	0	0.147059	0.852941	10	1	58	1
O-	v87	0	0.132353	0.867647	9	1	58	1
O-	v87	0	0.117647	0.882353	8	1	58	1
O-	v87	1	0.13	0.87	NA	1	58	1
OO	v87	0	0.367647	0.632353	25	0	59	1
OO	v87	0	0.352941	0.647059	24	0	59	1
OO	v87	0	0.382353	0.617647	26	0	59	1
OO	v87	0	0.308824	0.691176	21	0	59	1
OO	v87	0	0.352941	0.647059	24	0	59	1
OO	v87	1	0.46	0.54	NA	0	59	1
PQ	v87	0	0.308824	0.691176	21	0	60	1
PQ	v87	0	0.352941	0.647059	24	0	60	1
PQ	v87	0	0.308824	0.691176	21	0	60	1
PQ	v87	0	0.382353	0.617647	26	0	60	1
PQ	v87	0	0.308824	0.691176	21	0	60	1
PQ	v87	1	0.31	0.69	NA	0	60	1
Q	v87	0	0.294118	0.705882	20	1	61	1
Q	v87	0	0.397059	0.602941	27	1	61	1
Q	v87	0	0.308824	0.691176	21	1	61	1
Q	v87	0	0.308824	0.691176	21	1	61	1
Q	v87	0	0.279412	0.720588	19	1	61	1
Q	v87	1	0.32	0.68	NA	1	61	1
RB	v87	0	0.338235	0.661765	23	1	62	1
RB	v87	0	0.323529	0.676471	22	1	62	1
RB	v87	0	0.294118	0.705882	20	1	62	1
RB	v87	0	0.367647	0.632353	25	1	62	1
RB	v87	0	0.264706	0.735294	18	1	62	1
RB	v87	1	0.28	0.72	NA	1	62	1
RG	v87	0	0.294118	0.705882	20	1	63	1
RG	v87	0	0.294118	0.705882	20	1	63	1
RG	v87	0	0.323529	0.676471	22	1	63	1
RG	v87	0	0.235294	0.764706	16	1	63	1
RG	v87	0	0.25	0.75	17	1	63	1
RG	v87	1	0.46	0.54	NA	1	63	1
RL	v87	0	0.0441176	0.955882	3	1	64	1
RL	v87	0	0.147059	0.852941	10	1	64	1
RL	v87	0	0.0882353	0.911765	6	1	64	1
RL	v87	0	0.0882353	0.911765	6	1	64	1
RL	v87	0	0.0735294	0.926471	5	1	64	1
RL	v87	1	0.03	0.97	NA	1	64	1
RO	v87	0	0.426471	0.573529	29	0	65	1
RO	v87	0	0.5	0.5	34	0	65	1
RO	v87	0	0.411765	0.588235	28	0	65	1
RO	v87	0	0.5	0.5	34	0	65	1
RO	v87	0	0.352941	0.647059	24	0	65	1
RO	v87	1	0.59	0.41	NA	0	65	1
RR	v87	0	0.25	0.75	17	1	66	1
RR	v87	0	0.132353	0.867647	9	1	66	1
RR	v87	0	0.279412	0.720588	19	1	66	1
RR	v87	0	0.161765	0.838235	11	1	66	1
RR	v87	0	0.25	0.75	17	1	66	1
RR	v87	1	0.1	0.9	NA	1	66	1
RY	v87	0	0.294118	0.705882	20	1	67	1
RY	v87	0	0.411765	0.588235	28	1	67	1
RY	v87	0	0.338235	0.661765	23	1	67	1
RY	v87	0	0.235294	0.764706	16	1	67	1
RY	v87	0	0.279412	0.720588	19	1	67	1
RY	v87	1	0.28	0.72	NA	1	67	1
X-	v87	0	0.147059	0.852941	10	1	68	1
X-	v87	0	0.117647	0.882353	8	1	68	1
X-	v87	0	0.264706	0.735294	18	1	68	1
X-	v87	0	0.102941	0.897059	7	1	68	1
X-	v87	0	0.117647	0.882353	8	1	68	1
X-	v87	1	0.12	0.88	NA	1	68	1
Y-	v87	0	0.117647	0.882353	8	1	69	1
Y-	v87	0	0.147059	0.852941	10	1	69	1
Y-	v87	0	0.191176	0.808824	13	1	69	1
Y-	v87	0	0.117647	0.882353	8	1	69	1
Y-	v87	0	0.147059	0.852941	10	1	69	1
Y-	v87	1	0.13	0.87	NA	1	69	1
_B	v72	0	0.45	0.55	24	0	70	1
_B	v72	0	0.4	0.6	21	0	70	1
_B	v72	0	0.51	0.49	27	0	70	1
_B	v72	0	0.45	0.55	24	0	70	1
_B	v72	0	0.47	0.53	25	0	70	1
_B	v72	1	0.62	0.38	NA	0	70	1
_D	v72	0	0.36	0.64	19	0	71	1
_D	v72	0	0.47	0.53	25	0	71	1
_D	v72	0	0.43	0.57	23	0	71	1
_D	v72	0	0.38	0.62	20	0	71	1
_D	v72	0	0.45	0.55	24	0	71	1
_D	v72	1	0.57	0.43	NA	0	71	1
_G	v72	0	0.26	0.74	14	1	72	1
_G	v72	0	0.45	0.55	24	1	72	1
_G	v72	0	0.4	0.6	21	1	72	1
_G	v72	0	0.38	0.62	20	1	72	1
_G	v72	0	0.4	0.6	21	1	72	1
_G	v72	1	0.43	0.57	NA	1	72	1
_L	v72	0	0.51	0.49	27	0	73	1
_L	v72	0	0.43	0.57	23	0	73	1
_L	v72	0	0.43	0.57	23	0	73	1
_L	v72	0	0.51	0.49	27	0	73	1
_L	v72	0	0.51	0.49	27	0	73	1
_L	v72	1	0.43	0.57	NA	0	73	1
_O	v72	0	0.17	0.83	9	1	74	1
_O	v72	0	0.11	0.89	6	1	74	1
_O	v72	0	0.23	0.77	12	1	74	1
_O	v72	0	0.21	0.79	11	1	74	1
_O	v72	0	0.23	0.77	12	1	74	1
_O	v72	1	0.25	0.75	NA	1	74	1
_R	v72	0	0.43	0.57	23	1	75	1
_R	v72	0	0.38	0.62	20	1	75	1
_R	v72	0	0.36	0.64	19	1	75	1
_R	v72	0	0.4	0.6	21	1	75	1
_R	v72	0	0.4	0.6	21	1	75	1
_R	v72	1	0.43	0.57	NA	1	75	1
_S	v72	0	0.45	0.55	24	0	76	1
_S	v72	0	0.42	0.58	22	0	76	1
_S	v72	0	0.45	0.55	24	0	76	1
_S	v72	0	0.42	0.58	22	0	76	1
_S	v72	0	0.38	0.62	20	0	76	1
_S	v72	1	0.38	0.62	NA	0	76	1
_W	v72	0	0.4	0.6	21	1	77	1
_W	v72	0	0.25	0.75	13	1	77	1
_W	v72	0	0.36	0.64	19	1	77	1
_W	v72	0	0.17	0.83	9	1	77	1
_W	v72	0	0.23	0.77	12	1	77	1
_W	v72	1	0.43	0.57	NA	1	77	1
_X	v72	0	0.38	0.62	20	1	78	1
_X	v72	0	0.4	0.6	21	1	78	1
_X	v72	0	0.38	0.62	20	1	78	1
_X	v72	0	0.36	0.64	19	1	78	1
_X	v72	0	0.26	0.74	14	1	78	1
_X	v72	1	0.45	0.55	NA	1	78	1
B-	v72	0	0.25	0.75	13	1	79	1
B-	v72	0	0.32	0.68	17	1	79	1
B-	v72	0	0.45	0.55	24	1	79	1
B-	v72	0	0.32	0.68	17	1	79	1
B-	v72	0	0.26	0.74	14	1	79	1
B-	v72	1	0.34	0.66	NA	1	79	1
G-	v72	0	0.13	0.87	7	1	80	1
G-	v72	0	0.09	0.91	5	1	80	1
G-	v72	0	0.06	0.94	3	1	80	1
G-	v72	0	0.11	0.89	6	1	80	1
G-	v72	0	0.15	0.85	8	1	80	1
G-	v72	1	0.04	0.96	NA	1	80	1
GG	v72	0	0.42	0.58	22	1	81	1
GG	v72	0	0.38	0.62	20	1	81	1
GG	v72	0	0.42	0.58	22	1	81	1
GG	v72	0	0.38	0.62	20	1	81	1
GG	v72	0	0.53	0.47	28	1	81	1
GG	v72	1	0.51	0.49	NA	1	81	1
O-	v72	0	0.34	0.66	18	1	82	1
O-	v72	0	0.36	0.64	19	1	82	1
O-	v72	0	0.34	0.66	18	1	82	1
O-	v72	0	0.34	0.66	18	1	82	1
O-	v72	0	0.42	0.58	22	1	82	1
O-	v72	1	0.47	0.53	NA	1	82	1
OO	v72	0	0.3	0.7	16	1	83	1
OO	v72	0	0.38	0.62	20	1	83	1
OO	v72	0	0.36	0.64	19	1	83	1
OO	v72	0	0.4	0.6	21	1	83	1
OO	v72	0	0.38	0.62	20	1	83	1
OO	v72	1	0.38	0.62	NA	1	83	1
PQ	v72	0	0.13	0.87	7	1	84	1
PQ	v72	0	0.15	0.85	8	1	84	1
PQ	v72	0	0.34	0.66	18	1	84	1
PQ	v72	0	0.32	0.68	17	1	84	1
PQ	v72	0	0.23	0.77	12	1	84	1
PQ	v72	1	0.32	0.68	NA	1	84	1
Q	v72	0	0.15	0.85	8	1	85	1
Q	v72	0	0.28	0.72	15	1	85	1
Q	v72	0	0.38	0.62	20	1	85	1
Q	v72	0	0.19	0.81	10	1	85	1
Q	v72	0	0.3	0.7	16	1	85	1
Q	v72	1	0.26	0.74	NA	1	85	1
RD	v72	0	0.38	0.62	20	0	86	1
RD	v72	0	0.32	0.68	17	0	86	1
RD	v72	0	0.34	0.66	18	0	86	1
RD	v72	0	0.36	0.64	19	0	86	1
RD	v72	0	0.4	0.6	21	0	86	1
RD	v72	1	0.4	0.6	NA	0	86	1
RG	v72	0	0.21	0.79	11	1	87	1
RG	v72	0	0.23	0.77	12	1	87	1
RG	v72	0	0.21	0.79	11	1	87	1
RG	v72	0	0.21	0.79	11	1	87	1
RG	v72	0	0.34	0.66	18	1	87	1
RG	v72	1	0.21	0.79	NA	1	87	1
RL	v72	0	0.26	0.74	14	1	88	1
RL	v72	0	0.19	0.81	10	1	88	1
RL	v72	0	0.19	0.81	10	1	88	1
RL	v72	0	0.23	0.77	12	1	88	1
RL	v72	0	0.36	0.64	19	1	88	1
RL	v72	1	0.23	0.77	NA	1	88	1
RO	v72	0	0.47	0.53	25	0	89	1
RO	v72	0	0.43	0.57	23	0	89	1
RO	v72	0	0.47	0.53	25	0	89	1
RO	v72	0	0.55	0.45	29	0	89	1
RO	v72	0	0.47	0.53	25	0	89	1
RO	v72	1	0.49	0.51	NA	0	89	1
RR	v72	0	0.34	0.66	18	1	90	1
RR	v72	0	0.13	0.87	7	1	90	1
RR	v72	0	0.34	0.66	18	1	90	1
RR	v72	0	0.17	0.83	9	1	90	1
RR	v72	0	0.26	0.74	14	1	90	1
RR	v72	1	0.19	0.81	NA	1	90	1
RW	v72	0	0.4	0.6	21	1	91	1
RW	v72	0	0.45	0.55	24	1	91	1
RW	v72	0	0.3	0.7	16	1	91	1
RW	v72	0	0.26	0.74	14	1	91	1
RW	v72	0	0.38	0.62	20	1	91	1
RW	v72	1	0.32	0.68	NA	1	91	1
RX	v72	0	0.11	0.89	6	1	92	1
RX	v72	0	0.23	0.77	12	1	92	1
RX	v72	0	0.23	0.77	12	1	92	1
RX	v72	0	0.11	0.89	6	1	92	1
RX	v72	0	0.09	0.91	5	1	92	1
RX	v72	1	0.13	0.87	NA	1	92	1
RY	v72	0	0.51	0.49	27	1	93	1
RY	v72	0	0.45	0.55	24	1	93	1
RY	v72	0	0.4	0.6	21	1	93	1
RY	v72	0	0.4	0.6	21	1	93	1
RY	v72	0	0.42	0.58	22	1	93	1
RY	v72	1	0.53	0.47	NA	1	93	1
S-	v72	0	0.47	0.53	25	0	94	1
S-	v72	0	0.43	0.57	23	0	94	1
S-	v72	0	0.4	0.6	21	0	94	1
S-	v72	0	0.36	0.64	19	0	94	1
S-	v72	0	0.36	0.64	19	0	94	1
S-	v72	1	0.6	0.4	NA	0	94	1
SS	v72	0	0.02	0.98	1	1	95	1
SS	v72	0	0.06	0.94	3	1	95	1
SS	v72	0	0.04	0.96	2	1	95	1
SS	v72	0	0.04	0.96	2	1	95	1
SS	v72	0	0.06	0.94	3	1	95	1
SS	v72	1	0.04	0.96	NA	1	95	1
W-	v72	0	0.19	0.81	10	1	96	1
W-	v72	0	0.4	0.6	21	1	96	1
W-	v72	0	0.3	0.7	16	1	96	1
W-	v72	0	0.34	0.66	18	1	96	1
W-	v72	0	0.45	0.55	24	1	96	1
W-	v72	1	0.32	0.68	NA	1	96	1
XX	v72	0	0.42	0.58	22	0	97	1
XX	v72	0	0.47	0.53	25	0	97	1
XX	v72	0	0.47	0.53	25	0	97	1
XX	v72	0	0.51	0.49	27	0	97	1
XX	v72	0	0.42	0.58	22	0	97	1
XX	v72	1	0.4	0.6	NA	0	97	1
Y-	v72	0	0.3	0.7	16	1	98	1
Y-	v72	0	0.26	0.74	14	1	98	1
Y-	v72	0	0.19	0.81	10	1	98	1
Y-	v72	0	0.28	0.72	15	1	98	1
Y-	v72	0	0.13	0.87	7	1	98	1
Y-	v72	1	0.26	0.74	NA	1	98	1
YR	v72	0	0.3	0.7	16	1	99	1
YR	v72	0	0.3	0.7	16	1	99	1
YR	v72	0	0.45	0.55	24	1	99	1
YR	v72	0	0.43	0.57	23	1	99	1
YR	v72	0	0.32	0.68	17	1	99	1
YR	v72	1	0.38	0.62	NA	1	99	1
_D	v99	0	0.23	0.77	15	1	100	1
_D	v99	0	0.29	0.71	19	1	100	1
_D	v99	0	0.27	0.73	18	1	100	1
_D	v99	0	0.26	0.74	17	1	100	1
_D	v99	0	0.29	0.71	19	1	100	1
_D	v99	1	0.32	0.68	NA	1	100	1
_G	v99	0	0.24	0.76	16	0	101	1
_G	v99	0	0.24	0.76	16	0	101	1
_G	v99	0	0.27	0.73	18	0	101	1
_G	v99	0	0.29	0.71	19	0	101	1
_G	v99	0	0.24	0.76	16	0	101	1
_G	v99	1	0.32	0.68	NA	0	101	1
_L	v99	0	0.23	0.77	15	1	102	1
_L	v99	0	0.09	0.91	6	1	102	1
_L	v99	0	0.18	0.82	12	1	102	1
_L	v99	0	0.24	0.76	16	1	102	1
_L	v99	0	0.2	0.8	13	1	102	1
_L	v99	1	0.09	0.91	NA	1	102	1
_O	v99	0	0.26	0.74	17	0	103	1
_O	v99	0	0.26	0.74	17	0	103	1
_O	v99	0	0.29	0.71	19	0	103	1
_O	v99	0	0.32	0.68	21	0	103	1
_O	v99	0	0.24	0.76	16	0	103	1
_O	v99	1	0.3	0.7	NA	0	103	1
_R	v99	0	0.14	0.86	9	1	104	1
_R	v99	0	0.21	0.79	14	1	104	1
_R	v99	0	0.17	0.83	11	1	104	1
_R	v99	0	0.15	0.85	10	1	104	1
_R	v99	0	0.09	0.91	6	1	104	1
_R	v99	1	0.15	0.85	NA	1	104	1
_S	v99	0	0.32	0.68	21	0	105	1
_S	v99	0	0.36	0.64	24	0	105	1
_S	v99	0	0.33	0.67	22	0	105	1
_S	v99	0	0.38	0.62	25	0	105	1
_S	v99	0	0.38	0.62	25	0	105	1
_S	v99	1	0.47	0.53	NA	0	105	1
_W	v99	0	0.21	0.79	14	1	106	1
_W	v99	0	0.24	0.76	16	1	106	1
_W	v99	0	0.24	0.76	16	1	106	1
_W	v99	0	0.09	0.91	6	1	106	1
_W	v99	0	0.24	0.76	16	1	106	1
_W	v99	1	0.2	0.8	NA	1	106	1
_X	v99	0	0.3	0.7	20	1	107	1
_X	v99	0	0.3	0.7	20	1	107	1
_X	v99	0	0.26	0.74	17	1	107	1
_X	v99	0	0.27	0.73	18	1	107	1
_X	v99	0	0.24	0.76	16	1	107	1
_X	v99	1	0.23	0.77	NA	1	107	1
B-	v99	0	0.3	0.7	20	1	108	1
B-	v99	0	0.12	0.88	8	1	108	1
B-	v99	0	0.2	0.8	13	1	108	1
B-	v99	0	0.27	0.73	18	1	108	1
B-	v99	0	0.23	0.77	15	1	108	1
B-	v99	1	0.24	0.76	NA	1	108	1
BR	v99	0	0.18	0.82	12	1	109	1
BR	v99	0	0.27	0.73	18	1	109	1
BR	v99	0	0.18	0.82	12	1	109	1
BR	v99	0	0.18	0.82	12	1	109	1
BR	v99	0	0.23	0.77	15	1	109	1
BR	v99	1	0.35	0.65	NA	1	109	1
D-	v99	0	0.06	0.94	4	1	110	1
D-	v99	0	0.05	0.95	3	1	110	1
D-	v99	0	0.15	0.85	10	1	110	1
D-	v99	0	0.14	0.86	9	1	110	1
D-	v99	0	0.15	0.85	10	1	110	1
D-	v99	1	0.21	0.79	NA	1	110	1
DD	v99	0	0.23	0.77	15	0	111	1
DD	v99	0	0.29	0.71	19	0	111	1
DD	v99	0	0.3	0.7	20	0	111	1
DD	v99	0	0.18	0.82	12	0	111	1
DD	v99	0	0.12	0.88	8	0	111	1
DD	v99	1	0.35	0.65	NA	0	111	1
L-	v99	0	0.18	0.82	12	1	112	1
L-	v99	0	0.17	0.83	11	1	112	1
L-	v99	0	0.18	0.82	12	1	112	1
L-	v99	0	0.14	0.86	9	1	112	1
L-	v99	0	0.2	0.8	13	1	112	1
L-	v99	1	0.24	0.76	NA	1	112	1
LL	v99	0	0.33	0.67	22	0	113	1
LL	v99	0	0.27	0.73	18	0	113	1
LL	v99	0	0.27	0.73	18	0	113	1
LL	v99	0	0.3	0.7	20	0	113	1
LL	v99	0	0.27	0.73	18	0	113	1
LL	v99	1	0.21	0.79	NA	0	113	1
O-	v99	0	0	1	0	1	114	1
O-	v99	0	0.12	0.88	8	1	114	1
O-	v99	0	0.08	0.92	5	1	114	1
O-	v99	0	0.08	0.92	5	1	114	1
O-	v99	0	0.05	0.95	3	1	114	1
O-	v99	1	0.02	0.98	NA	1	114	1
PQ	v99	0	0.08	0.92	5	1	115	1
PQ	v99	0	0.05	0.95	3	1	115	1
PQ	v99	0	0.08	0.92	5	1	115	1
PQ	v99	0	0.2	0.8	13	1	115	1
PQ	v99	0	0.15	0.85	10	1	115	1
PQ	v99	1	0.11	0.89	NA	1	115	1
Q	v99	0	0.23	0.77	15	1	116	1
Q	v99	0	0.18	0.82	12	1	116	1
Q	v99	0	0.15	0.85	10	1	116	1
Q	v99	0	0.11	0.89	7	1	116	1
Q	v99	0	0.17	0.83	11	1	116	1
Q	v99	1	0.26	0.74	NA	1	116	1
R-	v99	0	0.2	0.8	13	1	117	1
R-	v99	0	0.18	0.82	12	1	117	1
R-	v99	0	0.26	0.74	17	1	117	1
R-	v99	0	0.08	0.92	5	1	117	1
R-	v99	0	0.29	0.71	19	1	117	1
R-	v99	1	0.15	0.85	NA	1	117	1
RL	v99	0	0.17	0.83	11	1	118	1
RL	v99	0	0.17	0.83	11	1	118	1
RL	v99	0	0.05	0.95	3	1	118	1
RL	v99	0	0.18	0.82	12	1	118	1
RL	v99	0	0.03	0.97	2	1	118	1
RL	v99	1	0.17	0.83	NA	1	118	1
RO	v99	0	0.26	0.74	17	1	119	1
RO	v99	0	0.27	0.73	18	1	119	1
RO	v99	0	0.29	0.71	19	1	119	1
RO	v99	0	0.33	0.67	22	1	119	1
RO	v99	0	0.35	0.65	23	1	119	1
RO	v99	1	0.64	0.36	NA	1	119	1
RR	v99	0	0.09	0.91	6	0	120	1
RR	v99	0	0.08	0.92	5	0	120	1
RR	v99	0	0.2	0.8	13	0	120	1
RR	v99	0	0.23	0.77	15	0	120	1
RR	v99	0	0.3	0.7	20	0	120	1
RR	v99	1	0.36	0.64	NA	0	120	1
RS	v99	0	0.26	0.74	17	1	121	1
RS	v99	0	0.33	0.67	22	1	121	1
RS	v99	0	0.26	0.74	17	1	121	1
RS	v99	0	0.23	0.77	15	1	121	1
RS	v99	0	0.26	0.74	17	1	121	1
RS	v99	1	0.26	0.74	NA	1	121	1
RW	v99	0	0.24	0.76	16	1	122	1
RW	v99	0	0.3	0.7	20	1	122	1
RW	v99	0	0.27	0.73	18	1	122	1
RW	v99	0	0.33	0.67	22	1	122	1
RW	v99	0	0.27	0.73	18	1	122	1
RW	v99	1	0.23	0.77	NA	1	122	1
RX	v99	0	0.33	0.67	22	1	123	1
RX	v99	0	0.3	0.7	20	1	123	1
RX	v99	0	0.36	0.64	24	1	123	1
RX	v99	0	0.32	0.68	21	1	123	1
RX	v99	0	0.27	0.73	18	1	123	1
RX	v99	1	0.39	0.61	NA	1	123	1
RY	v99	0	0.06	0.94	4	1	124	1
RY	v99	0	0.15	0.85	10	1	124	1
RY	v99	0	0.15	0.85	10	1	124	1
RY	v99	0	0.2	0.8	13	1	124	1
RY	v99	0	0.15	0.85	10	1	124	1
RY	v99	1	0.17	0.83	NA	1	124	1
S-	v99	0	0.23	0.77	15	1	125	1
S-	v99	0	0.24	0.76	16	1	125	1
S-	v99	0	0.26	0.74	17	1	125	1
S-	v99	0	0.32	0.68	21	1	125	1
S-	v99	0	0.29	0.71	19	1	125	1
S-	v99	1	0.24	0.76	NA	1	125	1
SS	v99	0	0.35	0.65	23	1	126	1
SS	v99	0	0.32	0.68	21	1	126	1
SS	v99	0	0.32	0.68	21	1	126	1
SS	v99	0	0.32	0.68	21	1	126	1
SS	v99	0	0.24	0.76	16	1	126	1
SS	v99	1	0.36	0.64	NA	1	126	1
W-	v99	0	0.15	0.85	10	1	127	1
W-	v99	0	0.3	0.7	20	1	127	1
W-	v99	0	0.09	0.91	6	1	127	1
W-	v99	0	0.26	0.74	17	1	127	1
W-	v99	0	0.2	0.8	13	1	127	1
W-	v99	1	0.23	0.77	NA	1	127	1
X-	v99	0	0.26	0.74	17	0	128	1
X-	v99	0	0.24	0.76	16	0	128	1
X-	v99	0	0.26	0.74	17	0	128	1
X-	v99	0	0.35	0.65	23	0	128	1
X-	v99	0	0.29	0.71	19	0	128	1
X-	v99	1	0.38	0.62	NA	0	128	1
XX	v99	0	0.02	0.98	1	1	129	1
XX	v99	0	0.05	0.95	3	1	129	1
XX	v99	0	0.17	0.83	11	1	129	1
XX	v99	0	0.14	0.86	9	1	129	1
XX	v99	0	0.09	0.91	6	1	129	1
XX	v99	1	0.06	0.94	NA	1	129	1
Y-	v99	0	0.29	0.71	19	1	130	1
Y-	v99	0	0.3	0.7	20	1	130	1
Y-	v99	0	0.23	0.77	15	1	130	1
Y-	v99	0	0.2	0.8	13	1	130	1
Y-	v99	0	0.29	0.71	19	1	130	1
Y-	v99	1	0.24	0.76	NA	1	130	1
YB	v99	0	0.17	0.83	11	1	131	1
YB	v99	0	0.08	0.92	5	1	131	1
YB	v99	0	0.24	0.76	16	1	131	1
YB	v99	0	0.18	0.82	12	1	131	1
YB	v99	0	0.18	0.82	12	1	131	1
YB	v99	1	0.08	0.92	NA	1	131	1
YD	v99	0	0.12	0.88	8	1	132	1
YD	v99	0	0.09	0.91	6	1	132	1
YD	v99	0	0.05	0.95	3	1	132	1
YD	v99	0	0.18	0.82	12	1	132	1
YD	v99	0	0.17	0.83	11	1	132	1
YD	v99	1	0.17	0.83	NA	1	132	1
YR	v99	0	0.05	0.95	3	1	133	1
YR	v99	0	0.11	0.89	7	1	133	1
YR	v99	0	0	1	0	1	133	1
YR	v99	0	0.08	0.92	5	1	133	1
YR	v99	0	0.12	0.88	8	1	133	1
YR	v99	1	0.02	0.98	NA	1	133	1
YS	v99	0	0.15	0.85	10	1	134	1
YS	v99	0	0.18	0.82	12	1	134	1
YS	v99	0	0.12	0.88	8	1	134	1
YS	v99	0	0.15	0.85	10	1	134	1
YS	v99	0	0.09	0.91	6	1	134	1
YS	v99	1	0.08	0.92	NA	1	134	1
YW	v99	0	0.06	0.94	4	1	135	1
YW	v99	0	0.03	0.97	2	1	135	1
YW	v99	0	0	1	0	1	135	1
YW	v99	0	0	1	0	1	135	1
YW	v99	0	0	1	0	1	135	1
YW	v99	1	0	1	NA	1	135	1
_B	v14	0	0.37	0.63	11	1	136	1
_B	v14	0	0.33	0.67	10	1	136	1
_B	v14	0	0.47	0.53	14	1	136	1
_B	v14	0	0.37	0.63	11	1	136	1
_B	v14	0	0.43	0.57	13	1	136	1
_B	v14	1	0.23	0.77	NA	1	136	1
_D	v14	0	0.5	0.5	15	0	137	1
_D	v14	0	0.43	0.57	13	0	137	1
_D	v14	0	0.6	0.4	18	0	137	1
_D	v14	0	0.53	0.47	16	0	137	1
_D	v14	0	0.47	0.53	14	0	137	1
_D	v14	1	0.37	0.63	NA	0	137	1
_O	v14	0	0.5	0.5	15	1	138	1
_O	v14	0	0.37	0.63	11	1	138	1
_O	v14	0	0.3	0.7	9	1	138	1
_O	v14	0	0.5	0.5	15	1	138	1
_O	v14	0	0.6	0.4	18	1	138	1
_O	v14	1	0.43	0.57	NA	1	138	1
_W	v14	0	0.67	0.33	20	0	139	1
_W	v14	0	0.67	0.33	20	0	139	1
_W	v14	0	0.63	0.37	19	0	139	1
_W	v14	0	0.5	0.5	15	0	139	1
_W	v14	0	0.7	0.3	21	0	139	1
_W	v14	1	0.47	0.53	NA	0	139	1
_X	v14	0	0.37	0.63	11	0	140	1
_X	v14	0	0.5	0.5	15	0	140	1
_X	v14	0	0.4	0.6	12	0	140	1
_X	v14	0	0.4	0.6	12	0	140	1
_X	v14	0	0.5	0.5	15	0	140	1
_X	v14	1	0.33	0.67	NA	0	140	1
DD	v14	0	0.67	0.33	20	0	141	1
DD	v14	0	0.67	0.33	20	0	141	1
DD	v14	0	0.67	0.33	20	0	141	1
DD	v14	0	0.7	0.3	21	0	141	1
DD	v14	0	0.7	0.3	21	0	141	1
DD	v14	1	0.57	0.43	NA	0	141	1
G-	v14	0	0.47	0.53	14	0	142	1
G-	v14	0	0.5	0.5	15	0	142	1
G-	v14	0	0.27	0.73	8	0	142	1
G-	v14	0	0.63	0.37	19	0	142	1
G-	v14	0	0.53	0.47	16	0	142	1
G-	v14	1	0.3	0.7	NA	0	142	1
GG	v14	0	0.27	0.73	8	1	143	1
GG	v14	0	0.27	0.73	8	1	143	1
GG	v14	0	0.27	0.73	8	1	143	1
GG	v14	0	0.27	0.73	8	1	143	1
GG	v14	0	0.23	0.77	7	1	143	1
GG	v14	1	0.2	0.8	NA	1	143	1
L-	v14	0	0.4	0.6	12	1	144	1
L-	v14	0	0.5	0.5	15	1	144	1
L-	v14	0	0.47	0.53	14	1	144	1
L-	v14	0	0.5	0.5	15	1	144	1
L-	v14	0	0.33	0.67	10	1	144	1
L-	v14	1	0.47	0.53	NA	1	144	1
LL	v14	0	0.47	0.53	14	0	145	1
LL	v14	0	0.4	0.6	12	0	145	1
LL	v14	0	0.43	0.57	13	0	145	1
LL	v14	0	0.43	0.57	13	0	145	1
LL	v14	0	0.47	0.53	14	0	145	1
LL	v14	1	0.43	0.57	NA	0	145	1
O-	v14	0	0.5	0.5	15	0	146	1
O-	v14	0	0.67	0.33	20	0	146	1
O-	v14	0	0.5	0.5	15	0	146	1
O-	v14	0	0.63	0.37	19	0	146	1
O-	v14	0	0.57	0.43	17	0	146	1
O-	v14	1	0.37	0.63	NA	0	146	1
OO	v14	0	0.33	0.67	10	0	147	1
OO	v14	0	0.27	0.73	8	0	147	1
OO	v14	0	0.47	0.53	14	0	147	1
OO	v14	0	0.37	0.63	11	0	147	1
OO	v14	0	0.47	0.53	14	0	147	1
OO	v14	1	0.33	0.67	NA	0	147	1
PQ	v14	0	0.87	0.13	26	1	148	1
PQ	v14	0	0.83	0.17	25	1	148	1
PQ	v14	0	0.8	0.2	24	1	148	1
PQ	v14	0	0.8	0.2	24	1	148	1
PQ	v14	0	0.83	0.17	25	1	148	1
PQ	v14	1	0.63	0.37	NA	1	148	1
Q	v14	0	0.6	0.4	18	0	149	1
Q	v14	0	0.57	0.43	17	0	149	1
Q	v14	0	0.77	0.23	23	0	149	1
Q	v14	0	0.47	0.53	14	0	149	1
Q	v14	0	0.7	0.3	21	0	149	1
Q	v14	1	0.47	0.53	NA	0	149	1
RY	v14	0	0.27	0.73	8	1	150	1
RY	v14	0	0.23	0.77	7	1	150	1
RY	v14	0	0.17	0.83	5	1	150	1
RY	v14	0	0.27	0.73	8	1	150	1
RY	v14	0	0.1	0.9	3	1	150	1
RY	v14	1	0.27	0.73	NA	1	150	1
S-	v14	0	0.3	0.7	9	1	151	1
S-	v14	0	0.3	0.7	9	1	151	1
S-	v14	0	0.5	0.5	15	1	151	1
S-	v14	0	0.57	0.43	17	1	151	1
S-	v14	0	0.57	0.43	17	1	151	1
S-	v14	1	0.37	0.63	NA	1	151	1
SS	v14	0	0.37	0.63	11	1	152	1
SS	v14	0	0.33	0.67	10	1	152	1
SS	v14	0	0.3	0.7	9	1	152	1
SS	v14	0	0.37	0.63	11	1	152	1
SS	v14	0	0.2	0.8	6	1	152	1
SS	v14	1	0.4	0.6	NA	1	152	1
X-	v14	0	0.37	0.63	11	1	153	1
X-	v14	0	0.57	0.43	17	1	153	1
X-	v14	0	0.53	0.47	16	1	153	1
X-	v14	0	0.27	0.73	8	1	153	1
X-	v14	0	0.43	0.57	13	1	153	1
X-	v14	1	0.3	0.7	NA	1	153	1
XX	v14	0	0.47	0.53	14	1	154	1
XX	v14	0	0.37	0.63	11	1	154	1
XX	v14	0	0.43	0.57	13	1	154	1
XX	v14	0	0.27	0.73	8	1	154	1
XX	v14	0	0.33	0.67	10	1	154	1
XX	v14	1	0.43	0.57	NA	1	154	1
YY	v14	0	0.63	0.37	19	0	155	1
YY	v14	0	0.53	0.47	16	0	155	1
YY	v14	0	0.57	0.43	17	0	155	1
YY	v14	0	0.43	0.57	13	0	155	1
YY	v14	0	0.53	0.47	16	0	155	1
YY	v14	1	0.33	0.67	NA	0	155	1

## Sheet: ovarian index2
nest	id	Case	OI	OI_bin
v72	YB	1	-2.864	0
v72	O-	2	-2.864	0
v72	_X	3	2.48	1
v72	_D	4	-2.864	0
v72	PQ	5	-2.864	0
v72	RB	6	-2.864	0
v72	RO	7	2.06	1
v72	_Y	8	-2.864	0
v72	_G	9	-2.864	0
v72	_B	10	2.757	1
v72	S-	11	1.441	1
v72	GG	12	-1.68	1
v72	RD	13	-2.864	0
v72	OO	14	-2.864	0
v72	RX	15	-2.864	0
v72	_R	16	2.208	1
v72	RY	17	-2.864	0
v72	_L	18	-2.864	0
v72	L-	19	3.255	1
v72	_S	20	0.575	1
v72	YR	21	-2.864	0
v72	_W	22	-2.864	0
v72	X-	23	-2.864	0
v72	Q	24	8.665	1
v82	D-	25	3.505	1
v82	Y-	26	4.661	1
v82	_L	27	-2.864	0
v82	_X	28	4.249	1
v82	O-	29	9.083	1
v82	_B	30	6.13	1
v82	RR	31	3.053	1
v82	PQ	32	4.223	1
v82	Q	33	14.889	1
v87	_D	34	-2.864	0
v87	_Y	35	-2.864	0
v87	RB	36	-2.864	0
v87	RG	37	1.354	1
v87	_S	38	-1.689	1
v87	DD	39	-2.864	0
v87	B-	40	-2.864	0
v87	_R	41	-2.864	0
v87	_B	42	2.881	1
v87	PQ	43	4.622	1
v87	_G	44	-2.864	0
v87	_L	45	-1.763	1
v87	O-	46	-1.601	1
v87	SS	47	12.733	1
v87	X-	48	-2.864	0
v87	RO	49	-2.864	0
v87	RL	50	-2.864	0
v87	L-	51	1.354	1
v87	OO	52	-2.864	0
v87	RY	53	-2.864	0
v14	RY	54	-2.864	0
v14	O-	55	1.165	1
v14	Q	56	18.895	1
v14	_W	57	1.012	1
v14	PQ	58	1.527	1
v14	L-	59	-2.864	0
v14	SS	60	-2.864	0
v14	_B	61	-2.864	0
v14	_X	62	-2.677	1
v14	XX	63	-2.864	0
v14	_D	64	-2.864	0
v14	LL	65	-2.864	0
v14	G-	66	-2.864	0
v14	_O	67	-0.686	1
v14	X-	68	2.854	1
v14	_G	69	-2.864	0
v14	OO	70	1.636	1
v99	YW	71	-2.864	0
v99	RY	72	-2.864	0
v99	D-	73	4.433	1
v99	PQ	74	4.397	1
v99	B-	75	-1.536	1
v99	Q	76	9.489	1
v99	R-	77	-2.864	0
v99	YS	78	-2.864	0
v99	RR	79	2.768	1
v99	RS	80	-2.864	0
v99	_D	81	-2.864	0
v99	B-2	82	2.693	1
v99	X-	83	3.359	1
v99	BR	84	-2.864	0
v99	_R	85	-2.864	0
v99	_O	86	-2.864	0
v99	SS	87	3.467	1
v99	YD	88	-2.864	0
v99	RX	89	-0.921	1
v99	W-	90	-1.451	1
v99	_X	91	3.319	1
v99	RO	92	-2.864	0
v99	YL	93	-2.864	0
v99	Y-	94	-2.864	0

## Sheet: dist_Q
id	nest	avg_ed
_B	v57	1.99
_D	v57	2.6
_G	v57	2.68
_O	v57	2.63
_W	v57	2.89
_X	v57	2.38
_Y	v57	2.55
BB	v57	2.47
G-	v57	2.66
GG	v57	2.83
L-	v57	1.61
O-	v57	2.65
OO	v57	2.62
PQ	v57	2.67
R-	v57	2.51
W-	v57	2.56
WW	v57	2.65
X-	v57	2.34
XX	v57	2.4
Y-	v57	2.84
_B	v82	3.23
_D	v82	3.39
_L	v82	2.63
_S	v82	2.77
_X	v82	3.01
B-	v82	2.71
BB	v82	2.98
D-	v82	2.86
G-	v82	2.26
GG	v82	2.45
L-	v82	2.49
LL	v82	2.37
OO	v82	2.84
PQ	v82	3.16
R-	v82	2.85
RR	v82	2.95
S-	v82	2.59
SS	v82	2.35
X-	v82	2.36
XX	v82	3.45
Y-	v82	3.04
_B	v87	3.19
_D	v87	3.24
_G	v87	3.25
_L	v87	3.08
_O	v87	3.55
_R	v87	2.8
_S	v87	3.34
_Y	v87	3.31
B-	v87	3.49
BB	v87	3.04
DD	v87	3.47
G-	v87	2.86
GG	v87	3.55
L-	v87	3.23
O-	v87	2.72
OO	v87	3.34
PQ	v87	3.34
RB	v87	2.68
RG	v87	2.99
RL	v87	2.44
RO	v87	3.17
RR	v87	3.07
RY	v87	2.87
X-	v87	2.61
Y-	v87	2.92
_B	v72	2.88
_D	v72	2.92
_G	v72	3.03
_L	v72	2.64
_O	v72	3.71
_R	v72	2.75
_S	v72	2.92
_W	v72	3.14
_X	v72	2.65
B-	v72	2.91
G-	v72	3.02
GG	v72	3.07
O-	v72	2.85
OO	v72	2.86
PQ	v72	2.71
RD	v72	2.73
RG	v72	2.77
RL	v72	2.78
RO	v72	2.9
RR	v72	2.48
RW	v72	3.34
RX	v72	2.8
RY	v72	3.01
S-	v72	3.08
SS	v72	2.94
W-	v72	2.59
XX	v72	3.01
Y-	v72	1.98
YR	v72	2.89
_D	v99	3.09
_G	v99	3.3
_L	v99	3.17
_O	v99	3.15
_R	v99	3.18
_S	v99	3.45
_W	v99	3.48
_X	v99	3.07
B-	v99	3.26
BR	v99	2.77
D-	v99	2.56
DD	v99	3.33
L-	v99	3.06
LL	v99	3.39
O-	v99	3.86
PQ	v99	3.25
R-	v99	3.45
RL	v99	2.82
RO	v99	3.51
RR	v99	3.29
RS	v99	3.49
RW	v99	3.43
RX	v99	3.34
RY	v99	2.83
S-	v99	3.91
SS	v99	3.09
W-	v99	3.11
X-	v99	3.04
XX	v99	3.42
Y-	v99	2.9
YB	v99	2.73
YD	v99	2.76
YR	v99	2.71
YS	v99	3.05
YW	v99	3.08
_B	v14	2.82
_D	v14	2.8
_O	v14	2.74
PQ	v14	2.47
_W	v14	2.84
_X	v14	2.82
DD	v14	2.75
G-	v14	2.6
GG	v14	2.8
L-	v14	2.57
LL	v14	2.89
O-	v14	2.62
OO	v14	2.06
RY	v14	2.73
S-	v14	2.68
SS	v14	2.67
X-	v14	2.64
XX	v14	2.71
YY	v14	3

## Sheet: alldata_activity
	id	nest	step.length
1	BB	v57	0.79
2	G-	v57	1.09
3	GG	v57	1.23
4	L-	v57	1.17
5	O-	v57	1.01
6	OO	v57	0.66
7	PQ	v57	1.45
8	Q	v57	1.51
9	R-	v57	1.33
10	W-	v57	1.42
11	WW	v57	1.39
12	X-	v57	1.04
13	XX	v57	1.12
14	Y-	v57	1.17
15	_B	v57	0.85
16	_D	v57	1.15
17	_G	v57	1.3
18	_O	v57	1.3
19	_W	v57	0.67
20	_X	v57	1.26
21	_Y	v57	1.7
1	B-	v82	1.43
2	BB	v82	1.44
3	D-	v82	2.63
4	G-	v82	0.58
5	GG	v82	0.88
6	L-	v82	0.78
7	LL	v82	0.54
8	OO	v82	1.42
9	PQ	v82	2.2
10	Q	v82	1.94
11	R-	v82	0.98
12	RR	v82	1.93
13	S-	v82	0.8
14	SS	v82	0.59
15	X-	v82	0.65
16	XX	v82	1.07
17	Y-	v82	2.1
18	_B	v82	1.81
19	_D	v82	1.75
20	_L	v82	0.95
21	_S	v82	0.82
22	_X	v82	1.88
1	B-	v87	1.47
2	BB	v87	1.41
3	DD	v87	0.64
4	G-	v87	0.9
5	GG	v87	0.18
6	L-	v87	1.63
7	O-	v87	0.69
8	OO	v87	1.28
9	PQ	v87	1.5
10	Q	v87	1.16
11	RB	v87	1.12
12	RG	v87	0.9
13	RL	v87	0.6
14	RO	v87	1.07
15	RR	v87	0.51
16	RY	v87	0.9
17	X-	v87	0.78
18	Y-	v87	1.04
19	_B	v87	1.11
20	_D	v87	0.64
21	_G	v87	0.75
22	_L	v87	1.28
23	_O	v87	0.8
24	_R	v87	0.75
25	_S	v87	1.36
26	_Y	v87	1.04
1	B-	v72	1.06
2	G-	v72	0.57
3	GG	v72	1.08
4	O-	v72	1.89
5	OO	v72	1.17
6	PQ	v72	1.51
7	Q	v72	1.86
8	RD	v72	1.38
9	RG	v72	0.69
10	RL	v72	1.1
11	RO	v72	1.71
12	RR	v72	1.27
13	RW	v72	1.15
14	RX	v72	0.37
15	RY	v72	1.05
16	S-	v72	1.44
17	SS	v72	NA
18	W-	v72	1.17
19	XX	v72	1.18
20	Y-	v72	1.07
21	YR	v72	1.01
22	_B	v72	1.8
23	_D	v72	1.71
24	_G	v72	1.18
25	_L	v72	1.72
26	_O	v72	0.82
27	_R	v72	1.84
28	_S	v72	1.28
29	_W	v72	0.48
30	_X	v72	1.84
1	B-	v99	0.98
2	BR	v99	0.77
3	D-	v99	0.77
4	DD	v99	NA
5	L-	v99	0.76
6	LL	v99	1.29
7	O-	v99	0.89
8	PQ	v99	1.35
9	Q	v99	2.32
10	R-	v99	1.23
11	RL	v99	0.57
12	RO	v99	0.92
13	RR	v99	1.23
14	RS	v99	1.18
15	RW	v99	0.87
16	RX	v99	1.25
17	RY	v99	0.58
18	S-	v99	1.13
19	SS	v99	1.87
20	W-	v99	1.29
21	X-	v99	1.32
22	XX	v99	NA
23	Y-	v99	0.93
24	YB	v99	0.88
25	YD	v99	0.8
26	YR	v99	0.58
27	YS	v99	0.79
28	YW	v99	0.74
29	_D	v99	1.39
30	_G	v99	1.16
31	_L	v99	0.77
32	_O	v99	1.08
33	_R	v99	1.27
34	_S	v99	1.66
35	_W	v99	1.24
36	_X	v99	1.39
1	DD	v14	0.962554
2	G-	v14	0.937735
3	GG	v14	0.580833
4	L-	v14	1.25085
5	LL	v14	1.07021
6	O-	v14	1.24466
7	OO	v14	1.18541
8	PQ	v14	NA
9	Q	v14	1.15024
10	RY	v14	0.658281
11	S-	v14	0.976524
12	SS	v14	0.847551
13	X-	v14	1.20674
14	XX	v14	0.849473
15	YY	v14	1.09732
16	_B	v14	1.06003
17	_D	v14	1.72697
18	_O	v14	1.18576
19	_W	v14	1.07068
20	_X	v14	1.32534

## Sheet: deg.all_DB
nest	id	DB_deg.all
v57	_B	5
v57	_G	19
v57	_Y	13
v57	_D	9
v57	G-	12
v57	OO	5
v57	_W	6
v57	_X	21
v57	BB	5
v57	L-	5
v57	PQ	23
v57	Q	22
v57	WW	17
v57	XX	10
v57	Y-	7
v57	_O	2
v57	W-	16
v57	O-	11
v57	GG	7
v57	R-	6
v57	X-	5
v72	_B	9
v72	_L	18
v72	_R	16
v72	O-	13
v72	OO	9
v72	Q	18
v72	Y-	1
v72	_D	6
v72	RG	1
v72	_G	3
v72	_O	3
v72	_S	9
v72	_W	5
v72	_X	9
v72	PQ	16
v72	RO	9
v72	RY	4
v72	S-	11
v72	W-	4
v72	B-	5
v72	XX	3
v72	RR	3
v72	RL	1
v72	RW	1
v72	YR	1
v82	_B	6
v82	_D	15
v82	_L	7
v82	D-	12
v82	Q	17
v82	_X	12
v82	BB	5
v82	PQ	15
v82	R-	5
v82	XX	6
v82	Y-	8
v82	B-	4
v82	_S	2
v82	RR	9
v82	X-	1
v82	G-	1
v82	L-	4
v82	LL	1
v82	OO	9
v82	GG	2
v82	S-	1
v87	_B	6
v87	_L	9
v87	OO	8
v87	RB	3
v87	_G	9
v87	B-	6
v87	GG	4
v87	L-	8
v87	RO	9
v87	_S	5
v87	Q	12
v87	_Y	3
v87	BB	20
v87	_D	1
v87	_O	1
v87	_R	1
v87	G-	4
v87	PQ	16
v87	RR	1
v87	O-	1
v87	RY	4
v87	RG	3
v87	X-	3
v87	Y-	1
v99	_D	7
v99	RO	2
v99	RX	5
v99	SS	23
v99	YS	3
v99	_O	5
v99	_S	3
v99	PQ	18
v99	_W	7
v99	_G	3
v99	YR	6
v99	_X	7
v99	_L	2
v99	D-	4
v99	Q	30
v99	B-	4
v99	L-	3
v99	DD	2
v99	LL	3
v99	RL	3
v99	RS	4
v99	S-	1
v99	W-	3
v99	X-	8
v99	R-	4
v99	RW	1
v99	RR	1
v99	BR	1
v99	RY	1
v99	YB	1
v99	Y-	1
v99	YD	1
v99	YW	1

## Sheet: deg.all_SC
nest	id	SC_deg.all
v14	_B	17
v14	_D	6
v14	_O	13
v14	_W	7
v14	_X	7
v14	DD	5
v14	L-	22
v14	LL	16
v14	O-	19
v14	OO	21
v14	PQ	2
v14	S-	20
v14	X-	8
v14	XX	6
v14	RY	4
v14	SS	5
v14	GG	4
v14	G-	3
v14	YY	1
v57	_B	9
v57	_Y	10
v57	G-	18
v57	L-	6
v57	X-	20
v57	Y-	14
v57	_D	11
v57	BB	16
v57	GG	8
v57	O-	22
v57	W-	15
v57	_G	17
v57	_X	18
v57	WW	18
v57	XX	11
v57	_O	4
v57	_W	5
v57	OO	7
v57	PQ	15
v57	Q	1
v57	R-	7
v72	_B	26
v72	_G	12
v72	_L	22
v72	_W	3
v72	_X	28
v72	O-	18
v72	OO	11
v72	PQ	33
v72	RD	9
v72	RO	25
v72	RR	15
v72	RW	8
v72	S-	21
v72	W-	17
v72	_D	16
v72	_R	26
v72	RG	7
v72	XX	14
v72	_S	14
v72	B-	8
v72	GG	10
v72	RL	6
v72	RY	7
v72	_O	1
v72	G-	2
v72	YR	4
v72	Q	1
v82	_B	6
v82	OO	12
v82	S-	7
v82	Y-	16
v82	_D	12
v82	_L	8
v82	_X	6
v82	D-	7
v82	LL	5
v82	PQ	23
v82	_S	7
v82	SS	3
v82	RR	5
v82	BB	1
v82	G-	3
v82	GG	2
v82	L-	2
v82	XX	3
v82	B-	2
v82	Q	3
v82	X-	3
v87	_B	9
v87	_Y	15
v87	L-	16
v87	OO	12
v87	RB	13
v87	RG	15
v87	_G	12
v87	_L	20
v87	_S	14
v87	B-	8
v87	RY	11
v87	DD	2
v87	G-	20
v87	Q	7
v87	X-	21
v87	_R	11
v87	PQ	21
v87	RO	17
v87	_D	1
v87	O-	9
v87	BB	8
v87	_O	1
v87	RR	1
v99	_D	14
v99	_G	16
v99	_L	4
v99	_O	9
v99	_R	1
v99	RS	7
v99	RW	6
v99	Y-	9
v99	_X	15
v99	D-	6
v99	L-	13
v99	PQ	38
v99	SS	26
v99	YD	7
v99	_W	9
v99	DD	4
v99	_S	15
v99	RL	3
v99	RO	4
v99	RY	8
v99	YW	5
v99	B-	5
v99	R-	9
v99	RX	6
v99	W-	13
v99	YB	9
v99	LL	5
v99	BR	1
v99	X-	12
v99	YR	12
v99	YS	3
v99	Q	8
v99	RR	5
v99	S-	1

## Sheet: deg.all_ST
nest	id	ST_deg.all
v57	_G	3
v57	_D	6
v57	Q	8
v57	XX	4
v57	_X	7
v57	_W	1
v57	G-	2
v57	O-	3
v57	OO	3
v57	PQ	6
v57	_Y	3
v57	X-	4
v57	GG	1
v57	L-	1
v57	W-	6
v57	WW	3
v57	Y-	1
v72	_B	37
v72	_G	17
v72	_L	33
v72	_S	24
v72	_W	10
v72	_X	36
v72	O-	31
v72	OO	19
v72	PQ	41
v72	RD	12
v72	RO	33
v72	RR	22
v72	RW	14
v72	S-	31
v72	W-	20
v72	_D	22
v72	_R	33
v72	RG	8
v72	XX	19
v72	_O	3
v72	B-	13
v72	GG	15
v72	RL	11
v72	RY	16
v72	G-	2
v72	YR	5
v72	Q	7
v82	_B	3
v82	_D	8
v82	_S	3
v82	XX	6
v82	D-	8
v82	OO	7
v82	PQ	12
v82	Y-	13
v82	_L	3
v82	_X	2
v82	BB	3
v82	G-	3
v82	GG	5
v82	RR	5
v82	L-	2
v82	LL	2
v82	Q	2
v82	X-	2
v82	S-	1
v87	_B	6
v87	_L	10
v87	B-	10
v87	_G	3
v87	RG	2
v87	L-	9
v87	Q	6
v87	_O	2
v87	PQ	6
v87	_R	3
v87	_S	2
v87	_Y	1
v87	O-	4
v87	OO	9
v87	BB	2
v87	DD	1
v87	RB	3
v87	X-	3
v87	RO	2
v87	RY	2
v87	RR	2
v99	_D	11
v99	Y-	2
v99	YR	7
v99	_G	2
v99	DD	3
v99	_O	3
v99	BR	1
v99	Q	6
v99	X-	3
v99	_X	2
v99	L-	2
v99	_W	5
v99	PQ	5
v99	RO	1
v99	RL	1
v99	RS	3
v99	RX	3
v99	SS	7
v99	YB	1

[truncated: 12 more sheets: v57_day123_raw, nest_v57_1, v72_day123_raw, nest_v72_1, v82_day123_raw, nest_v82_1, v87_day123_raw, nest_v87_1, v99_day123_raw, nest_v99_1, v14_day123_raw, nest_v14_1]
